# Supplementary material for: Detecting differential copy number variation between groups of samples
Source: HighWire-hosted journal article supplement (doi:10.1101/gr.206938.116), 2017-12-11
Supplement: Supplemental_Tables.xlsx [file Supplemental_Tables.xlsx]

## Sheet: tableS4_allMarineFreshCNVs
chrom (gasAcu1)	start (zero-based closed)	end (zero-based open)	name	closest transcription start site	any overlap with protein-coding	any overlap with cross-species conservation	ecotype with greater copy number	deletion or duplication relative to assembly
chrI	271211	271444	mfCnv1	ENSGACG00000004395	noncoding	no	freshGreaterThanMarine	deletion
chrI	310489	310548	mfCnv2	ENSGACG00000004395	noncoding	no	freshGreaterThanMarine	deletion
chrI	312038	312769	mfCnv3	ENSGACG00000004395	noncoding	no	freshGreaterThanMarine	deletion
chrI	315003	315089	mfCnv4	ENSGACG00000004395	noncoding	no	freshGreaterThanMarine	deletion
chrI	542091	542393	mfCnv5	ENSGACG00000004395	noncoding	no	marineGreaterThanFresh	deletion
chrI	603155	603371	mfCnv6	ENSGACG00000004395	noncoding	no	freshGreaterThanMarine	both
chrI	745664	745735	mfCnv7	ENSGACG00000004395	noncoding	no	freshGreaterThanMarine	deletion
chrI	851662	852559	mfCnv8	ENSGACG00000004395	noncoding	no	marineGreaterThanFresh	duplication
chrI	856310	856888	mfCnv9	ENSGACG00000004395	ENSGACG00000005067	yes	marineGreaterThanFresh	duplication
chrI	858202	858515	mfCnv10	ENSGACG00000004395	ENSGACG00000005067	yes	marineGreaterThanFresh	duplication
chrI	859997	860720	mfCnv11	ENSGACG00000004395	ENSGACG00000005067	no	marineGreaterThanFresh	duplication
chrI	863309	863501	mfCnv12	ENSGACG00000004395	ENSGACG00000005067	no	marineGreaterThanFresh	duplication
chrI	863662	863966	mfCnv13	ENSGACG00000004395	ENSGACG00000005067	no	marineGreaterThanFresh	duplication
chrI	864293	865627	mfCnv14	ENSGACG00000004395	ENSGACG00000005067	yes	marineGreaterThanFresh	duplication
chrI	868014	868190	mfCnv15	ENSGACG00000004395	noncoding	no	marineGreaterThanFresh	duplication
chrI	869941	870133	mfCnv16	ENSGACG00000004395	noncoding	no	marineGreaterThanFresh	duplication
chrI	870774	871055	mfCnv17	ENSGACG00000004395	noncoding	no	marineGreaterThanFresh	duplication
chrI	871680	871945	mfCnv18	ENSGACG00000004395	noncoding	no	marineGreaterThanFresh	duplication
chrI	1112340	1112391	mfCnv19	ENSGACG00000004458	noncoding	no	marineGreaterThanFresh	deletion
chrI	1361595	1361648	mfCnv20	ENSGACG00000004631	ENSGACG00000005438	yes	marineGreaterThanFresh	deletion
chrI	1958594	1958647	mfCnv21	ENSGACG00000005228	noncoding	yes	marineGreaterThanFresh	deletion
chrI	2141840	2142301	mfCnv22	ENSGACG00000005285	noncoding	no	freshGreaterThanMarine	duplication
chrI	2193957	2194001	mfCnv23	ENSGACG00000005337	noncoding	yes	marineGreaterThanFresh	deletion
chrI	2892807	2893043	mfCnv24	ENSGACG00000005732	noncoding	no	freshGreaterThanMarine	both
chrI	2893498	2894082	mfCnv25	ENSGACG00000005732	ENSGACG00000006236	yes	freshGreaterThanMarine	both
chrI	2895326	2898127	mfCnv26	ENSGACG00000005732	ENSGACG00000006236	no	freshGreaterThanMarine	duplication
chrI	2898189	2898329	mfCnv27	ENSGACG00000005732	noncoding	no	freshGreaterThanMarine	both
chrI	2898353	2900871	mfCnv28	ENSGACG00000005732	ENSGACG00000006248	no	freshGreaterThanMarine	both
chrI	2901733	2901834	mfCnv29	ENSGACG00000005747	noncoding	no	freshGreaterThanMarine	both
chrI	2922100	2922290	mfCnv30	ENSGACG00000005747	noncoding	no	freshGreaterThanMarine	deletion
chrI	2937283	2939061	mfCnv31	ENSGACG00000005764	noncoding	no	freshGreaterThanMarine	both
chrI	2939061	2939203	mfCnv32	ENSGACG00000005764	noncoding	no	freshGreaterThanMarine	deletion
chrI	2939292	2939799	mfCnv33	ENSGACG00000005764	noncoding	no	freshGreaterThanMarine	both
chrI	2940143	2940731	mfCnv34	ENSGACG00000005764	noncoding	no	freshGreaterThanMarine	both
chrI	2940781	2941054	mfCnv35	ENSGACG00000005764	noncoding	no	freshGreaterThanMarine	both
chrI	2941613	2942023	mfCnv36	ENSGACG00000005764	noncoding	yes	freshGreaterThanMarine	both
chrI	2943197	2943891	mfCnv37	ENSGACG00000005764	noncoding	no	freshGreaterThanMarine	both
chrI	2943891	2944517	mfCnv38	ENSGACG00000005764	ENSGACG00000006248	no	freshGreaterThanMarine	duplication
chrI	2945084	2945285	mfCnv39	ENSGACG00000005764	ENSGACG00000006248	no	freshGreaterThanMarine	both
chrI	2945395	2945485	mfCnv40	ENSGACG00000005764	ENSGACG00000006248	no	freshGreaterThanMarine	deletion
chrI	2945857	2948960	mfCnv41	ENSGACG00000005764	noncoding	yes	freshGreaterThanMarine	both
chrI	2949318	2950362	mfCnv42	ENSGACG00000005764	noncoding	yes	freshGreaterThanMarine	both
chrI	2951890	2952784	mfCnv43	ENSGACG00000005764	noncoding	no	freshGreaterThanMarine	both
chrI	2952825	2953640	mfCnv44	ENSGACG00000005764	noncoding	no	freshGreaterThanMarine	both
chrI	2953863	2954014	mfCnv45	ENSGACG00000005764	noncoding	no	freshGreaterThanMarine	both
chrI	2954349	2954986	mfCnv46	ENSGACG00000005764	ENSGACG00000006254	no	freshGreaterThanMarine	both
chrI	2964318	2964539	mfCnv47	ENSGACG00000005779	ENSGACG00000006254	no	freshGreaterThanMarine	both
chrI	2967322	2967572	mfCnv48	ENSGACG00000005779	noncoding	no	freshGreaterThanMarine	both
chrI	2969047	2969665	mfCnv49	ENSGACG00000005779	noncoding	no	freshGreaterThanMarine	both
chrI	2969786	2970093	mfCnv50	ENSGACG00000005779	noncoding	no	freshGreaterThanMarine	both
chrI	2970817	2971604	mfCnv51	ENSGACG00000005779	noncoding	no	freshGreaterThanMarine	duplication
chrI	2971647	2972238	mfCnv52	ENSGACG00000005793	noncoding	no	freshGreaterThanMarine	both
chrI	2972464	2972678	mfCnv53	ENSGACG00000005793	noncoding	no	freshGreaterThanMarine	both
chrI	2973582	2973928	mfCnv54	ENSGACG00000005793	noncoding	no	freshGreaterThanMarine	both
chrI	2980788	2981351	mfCnv55	ENSGACG00000005793	noncoding	no	freshGreaterThanMarine	deletion
chrI	2981351	2981481	mfCnv56	ENSGACG00000005793	noncoding	no	freshGreaterThanMarine	deletion
chrI	4254041	4254108	mfCnv57	ENSGACG00000006478	noncoding	no	freshGreaterThanMarine	deletion
chrI	6924215	6924285	mfCnv58	ENSGACG00000007672	noncoding	no	freshGreaterThanMarine	deletion
chrI	7045633	7045688	mfCnv59	ENSGACG00000007728	noncoding	no	freshGreaterThanMarine	deletion
chrI	7053730	7053860	mfCnv60	ENSGACG00000007728	noncoding	no	freshGreaterThanMarine	deletion
chrI	7428749	7428882	mfCnv61	ENSGACG00000008066	noncoding	no	freshGreaterThanMarine	deletion
chrI	7601740	7601897	mfCnv62	ENSGACG00000008129	noncoding	no	freshGreaterThanMarine	deletion
chrI	7660357	7660398	mfCnv63	ENSGACG00000008149	noncoding	no	freshGreaterThanMarine	deletion
chrI	7668969	7669052	mfCnv64	ENSGACG00000008149	noncoding	no	freshGreaterThanMarine	deletion
chrI	7682016	7682107	mfCnv65	ENSGACG00000008149	noncoding	no	freshGreaterThanMarine	deletion
chrI	7689785	7689862	mfCnv66	ENSGACG00000008149	noncoding	no	freshGreaterThanMarine	deletion
chrI	7697828	7697902	mfCnv67	ENSGACG00000008149	noncoding	no	freshGreaterThanMarine	deletion
chrI	7698721	7698773	mfCnv68	ENSGACG00000008149	noncoding	no	freshGreaterThanMarine	deletion
chrI	7704927	7705062	mfCnv69	ENSGACG00000008149	noncoding	no	freshGreaterThanMarine	deletion
chrI	7771672	7771738	mfCnv70	ENSGACG00000008165	noncoding	no	freshGreaterThanMarine	deletion
chrI	7829292	7829355	mfCnv71	ENSGACG00000008198	noncoding	yes	freshGreaterThanMarine	deletion
chrI	7861019	7861089	mfCnv72	ENSGACG00000008224	noncoding	no	freshGreaterThanMarine	deletion
chrI	7864218	7864320	mfCnv73	ENSGACG00000008224	noncoding	no	freshGreaterThanMarine	deletion
chrI	7872537	7872656	mfCnv74	ENSGACG00000008224	noncoding	yes	freshGreaterThanMarine	deletion
chrI	7874965	7875061	mfCnv75	ENSGACG00000008224	noncoding	no	freshGreaterThanMarine	deletion
chrI	7879981	7880064	mfCnv76	ENSGACG00000008224	noncoding	no	freshGreaterThanMarine	deletion
chrI	7887271	7887369	mfCnv77	ENSGACG00000008224	noncoding	no	freshGreaterThanMarine	deletion
chrI	7895088	7895238	mfCnv78	ENSGACG00000008228	ENSGACG00000008825	yes	marineGreaterThanFresh	duplication
chrI	7934429	7934764	mfCnv79	ENSGACG00000008263	noncoding	no	freshGreaterThanMarine	deletion
chrI	7942111	7942165	mfCnv80	ENSGACG00000008263	noncoding	no	freshGreaterThanMarine	deletion
chrI	7954173	7954249	mfCnv81	ENSGACG00000008263	noncoding	no	freshGreaterThanMarine	deletion
chrI	7955083	7955145	mfCnv82	ENSGACG00000008263	noncoding	no	freshGreaterThanMarine	deletion
chrI	7957315	7957397	mfCnv83	ENSGACG00000008263	noncoding	no	freshGreaterThanMarine	deletion
chrI	7982385	7982486	mfCnv84	ENSGACG00000008263	noncoding	no	freshGreaterThanMarine	deletion
chrI	7994075	7994122	mfCnv85	ENSGACG00000008318	noncoding	no	freshGreaterThanMarine	deletion
chrI	7997012	7997068	mfCnv86	ENSGACG00000008318	noncoding	no	freshGreaterThanMarine	deletion
chrI	8049536	8049573	mfCnv87	ENSGACG00000008344	noncoding	no	freshGreaterThanMarine	deletion
chrI	8062202	8062282	mfCnv88	ENSGACG00000008344	noncoding	no	freshGreaterThanMarine	deletion
chrI	8092649	8092784	mfCnv89	ENSGACG00000008387	noncoding	no	freshGreaterThanMarine	deletion
chrI	8099509	8099597	mfCnv90	ENSGACG00000008387	noncoding	no	freshGreaterThanMarine	deletion
chrI	8101082	8101131	mfCnv91	ENSGACG00000008387	noncoding	no	freshGreaterThanMarine	deletion
chrI	8103804	8103846	mfCnv92	ENSGACG00000008387	noncoding	no	freshGreaterThanMarine	deletion
chrI	8184260	8185048	mfCnv93	ENSGACG00000008387	noncoding	no	marineGreaterThanFresh	deletion
chrI	8296297	8296429	mfCnv94	ENSGACG00000008387	noncoding	no	freshGreaterThanMarine	deletion
chrI	8296552	8296656	mfCnv95	ENSGACG00000008387	noncoding	no	freshGreaterThanMarine	deletion
chrI	8314189	8314253	mfCnv96	ENSGACG00000008387	noncoding	no	freshGreaterThanMarine	deletion
chrI	8318984	8319125	mfCnv97	ENSGACG00000008387	noncoding	yes	freshGreaterThanMarine	deletion
chrI	8407174	8407216	mfCnv98	ENSGACG00000008387	noncoding	no	freshGreaterThanMarine	deletion
chrI	8414670	8414718	mfCnv99	ENSGACG00000008387	noncoding	no	freshGreaterThanMarine	deletion
chrI	8519500	8519583	mfCnv100	ENSGACG00000008448	noncoding	no	freshGreaterThanMarine	deletion
chrI	8557984	8558085	mfCnv101	ENSGACG00000008584	noncoding	no	freshGreaterThanMarine	deletion
chrI	8561528	8561613	mfCnv102	ENSGACG00000008584	noncoding	no	freshGreaterThanMarine	deletion
chrI	8565544	8565598	mfCnv103	ENSGACG00000008584	noncoding	no	freshGreaterThanMarine	deletion
chrI	8566358	8566408	mfCnv104	ENSGACG00000008584	noncoding	no	freshGreaterThanMarine	deletion
chrI	8577151	8577267	mfCnv105	ENSGACG00000008610	noncoding	no	freshGreaterThanMarine	deletion
chrI	8581333	8581417	mfCnv106	ENSGACG00000008619	noncoding	yes	freshGreaterThanMarine	deletion
chrI	8583196	8583796	mfCnv107	ENSGACG00000008619	noncoding	no	freshGreaterThanMarine	deletion
chrI	8591972	8592046	mfCnv108	ENSGACG00000008625	noncoding	yes	freshGreaterThanMarine	deletion
chrI	8636201	8636251	mfCnv109	ENSGACG00000008718	noncoding	no	freshGreaterThanMarine	deletion
chrI	8676138	8676183	mfCnv110	ENSGACG00000008738	noncoding	no	freshGreaterThanMarine	deletion
chrI	8732017	8732076	mfCnv111	ENSGACG00000008742	noncoding	yes	freshGreaterThanMarine	deletion
chrI	8871887	8871967	mfCnv112	ENSGACG00000008799	noncoding	yes	freshGreaterThanMarine	deletion
chrI	8872877	8872928	mfCnv113	ENSGACG00000008799	noncoding	no	freshGreaterThanMarine	deletion
chrI	8877725	8877780	mfCnv114	ENSGACG00000008799	noncoding	no	freshGreaterThanMarine	deletion
chrI	8880358	8880422	mfCnv115	ENSGACG00000008799	noncoding	no	freshGreaterThanMarine	deletion
chrI	8919891	8920054	mfCnv116	ENSGACG00000008883	noncoding	no	freshGreaterThanMarine	deletion
chrI	8940946	8941032	mfCnv117	ENSGACG00000008883	noncoding	no	freshGreaterThanMarine	deletion
chrI	8944804	8944847	mfCnv118	ENSGACG00000008883	noncoding	no	freshGreaterThanMarine	deletion
chrI	8944950	8945174	mfCnv119	ENSGACG00000008883	noncoding	no	freshGreaterThanMarine	deletion
chrI	8945275	8945341	mfCnv120	ENSGACG00000008883	noncoding	no	freshGreaterThanMarine	deletion
chrI	8948887	8948941	mfCnv121	ENSGACG00000008883	noncoding	no	freshGreaterThanMarine	deletion
chrI	8949719	8949772	mfCnv122	ENSGACG00000008883	noncoding	no	freshGreaterThanMarine	deletion
chrI	8951897	8951959	mfCnv123	ENSGACG00000008883	noncoding	no	freshGreaterThanMarine	deletion
chrI	8965712	8965773	mfCnv124	ENSGACG00000008993	noncoding	no	freshGreaterThanMarine	deletion
chrI	9137297	9137496	mfCnv125	ENSGACG00000009072	noncoding	no	freshGreaterThanMarine	deletion
chrI	9348655	9348721	mfCnv126	ENSGACG00000009084	noncoding	no	freshGreaterThanMarine	deletion
chrI	9377523	9377601	mfCnv127	ENSGACG00000009097	noncoding	no	freshGreaterThanMarine	deletion
chrI	9380527	9380600	mfCnv128	ENSGACG00000009097	noncoding	no	freshGreaterThanMarine	deletion
chrI	9393286	9393332	mfCnv129	ENSGACG00000009097	noncoding	no	freshGreaterThanMarine	deletion
chrI	9397727	9397863	mfCnv130	ENSGACG00000009109	noncoding	no	freshGreaterThanMarine	deletion
chrI	9403908	9403979	mfCnv131	ENSGACG00000009117	noncoding	no	freshGreaterThanMarine	deletion
chrI	9405145	9405192	mfCnv132	ENSGACG00000009117	noncoding	yes	freshGreaterThanMarine	deletion
chrI	9405522	9405576	mfCnv133	ENSGACG00000009117	noncoding	yes	freshGreaterThanMarine	deletion
chrI	9409468	9409600	mfCnv134	ENSGACG00000009117	noncoding	no	freshGreaterThanMarine	deletion
chrI	9410822	9410937	mfCnv135	ENSGACG00000009117	noncoding	no	freshGreaterThanMarine	deletion
chrI	9427913	9428223	mfCnv136	ENSGACG00000009125	noncoding	no	freshGreaterThanMarine	deletion
chrI	9428938	9431467	mfCnv137	ENSGACG00000009125	ENSGACG00000009610	yes	freshGreaterThanMarine	duplication
chrI	9431689	9432354	mfCnv138	ENSGACG00000009125	noncoding	no	freshGreaterThanMarine	deletion
chrI	9453251	9453339	mfCnv139	ENSGACG00000009125	noncoding	no	freshGreaterThanMarine	deletion
chrI	9454811	9455047	mfCnv140	ENSGACG00000009125	noncoding	no	freshGreaterThanMarine	deletion
chrI	9457368	9457473	mfCnv141	ENSGACG00000009125	noncoding	no	freshGreaterThanMarine	deletion
chrI	9457993	9458825	mfCnv142	ENSGACG00000009125	noncoding	no	freshGreaterThanMarine	deletion
chrI	9460116	9460512	mfCnv143	ENSGACG00000009125	noncoding	no	freshGreaterThanMarine	deletion
chrI	9462147	9462203	mfCnv144	ENSGACG00000009125	noncoding	no	freshGreaterThanMarine	deletion
chrI	9465679	9465731	mfCnv145	ENSGACG00000009131	noncoding	no	freshGreaterThanMarine	deletion
chrI	9470616	9471212	mfCnv146	ENSGACG00000009131	noncoding	yes	freshGreaterThanMarine	deletion
chrI	9472643	9472734	mfCnv147	ENSGACG00000009131	noncoding	no	freshGreaterThanMarine	deletion
chrI	9586102	9586547	mfCnv148	ENSGACG00000009176	noncoding	no	marineGreaterThanFresh	deletion
chrI	9658596	9658799	mfCnv149	ENSGACG00000009231	noncoding	no	freshGreaterThanMarine	deletion
chrI	9671033	9671165	mfCnv150	ENSGACG00000009256	noncoding	no	freshGreaterThanMarine	deletion
chrI	9778713	9778791	mfCnv151	ENSGACG00000009256	noncoding	no	freshGreaterThanMarine	deletion
chrI	9778913	9779042	mfCnv152	ENSGACG00000009256	noncoding	no	freshGreaterThanMarine	deletion
chrI	9785336	9785638	mfCnv153	ENSGACG00000009256	noncoding	no	freshGreaterThanMarine	deletion
chrI	9842368	9842423	mfCnv154	ENSGACG00000009257	noncoding	no	freshGreaterThanMarine	deletion
chrI	9860297	9860351	mfCnv155	ENSGACG00000009257	noncoding	no	freshGreaterThanMarine	deletion
chrI	10184462	10184517	mfCnv156	ENSGACG00000009494	noncoding	no	marineGreaterThanFresh	deletion
chrI	10326646	10326764	mfCnv157	ENSGACG00000009566	noncoding	no	freshGreaterThanMarine	deletion
chrI	10328623	10328779	mfCnv158	ENSGACG00000009566	noncoding	no	freshGreaterThanMarine	deletion
chrI	10358136	10358179	mfCnv159	ENSGACG00000009594	noncoding	no	freshGreaterThanMarine	deletion
chrI	10386815	10386883	mfCnv160	ENSGACG00000009600	noncoding	no	freshGreaterThanMarine	deletion
chrI	10398668	10398773	mfCnv161	ENSGACG00000009604	noncoding	no	freshGreaterThanMarine	deletion
chrI	10414314	10414378	mfCnv162	ENSGACG00000009619	noncoding	no	freshGreaterThanMarine	deletion
chrI	10423591	10423793	mfCnv163	ENSGACG00000009619	noncoding	no	freshGreaterThanMarine	deletion
chrI	11665201	11665258	mfCnv164	ENSGACG00000010329	noncoding	no	freshGreaterThanMarine	deletion
chrI	11679031	11679082	mfCnv165	ENSGACG00000010337	noncoding	no	freshGreaterThanMarine	deletion
chrI	11685918	11685960	mfCnv166	ENSGACG00000010337	noncoding	no	freshGreaterThanMarine	deletion
chrI	11689590	11689632	mfCnv167	ENSGACG00000010337	noncoding	no	freshGreaterThanMarine	deletion
chrI	11694043	11694241	mfCnv168	ENSGACG00000010342	noncoding	no	freshGreaterThanMarine	deletion
chrI	11694962	11695035	mfCnv169	ENSGACG00000010342	noncoding	no	freshGreaterThanMarine	deletion
chrI	11718985	11719257	mfCnv170	ENSGACG00000010342	noncoding	no	freshGreaterThanMarine	deletion
chrI	11828119	11828240	mfCnv171	ENSGACG00000010410	noncoding	no	freshGreaterThanMarine	deletion
chrI	11852526	11852578	mfCnv172	ENSGACG00000010429	noncoding	no	freshGreaterThanMarine	deletion
chrI	11866790	11867044	mfCnv173	ENSGACG00000010440	noncoding	no	freshGreaterThanMarine	deletion
chrI	11944051	11944134	mfCnv174	ENSGACG00000010488	noncoding	no	freshGreaterThanMarine	deletion
chrI	11944524	11944589	mfCnv175	ENSGACG00000010488	noncoding	no	freshGreaterThanMarine	deletion
chrI	11946524	11946713	mfCnv176	ENSGACG00000010488	noncoding	no	freshGreaterThanMarine	deletion
chrI	11953147	11953218	mfCnv177	ENSGACG00000010497	noncoding	no	freshGreaterThanMarine	deletion
chrI	11957471	11957581	mfCnv178	ENSGACG00000010497	noncoding	no	freshGreaterThanMarine	deletion
chrI	11957845	11957892	mfCnv179	ENSGACG00000010497	noncoding	no	freshGreaterThanMarine	deletion
chrI	11959787	11959833	mfCnv180	ENSGACG00000010497	ENSGACG00000010917	no	freshGreaterThanMarine	deletion
chrI	12000372	12000659	mfCnv181	ENSGACG00000010555	noncoding	no	freshGreaterThanMarine	deletion
chrI	12001544	12001592	mfCnv182	ENSGACG00000010555	noncoding	no	freshGreaterThanMarine	deletion
chrI	12004568	12004650	mfCnv183	ENSGACG00000010555	noncoding	no	freshGreaterThanMarine	deletion
chrI	12012166	12012341	mfCnv184	ENSGACG00000010555	noncoding	no	freshGreaterThanMarine	deletion
chrI	12027833	12027899	mfCnv185	ENSGACG00000010555	noncoding	no	freshGreaterThanMarine	deletion
chrI	12050163	12050235	mfCnv186	ENSGACG00000010573	noncoding	no	freshGreaterThanMarine	deletion
chrI	12050462	12050724	mfCnv187	ENSGACG00000010573	noncoding	no	freshGreaterThanMarine	deletion
chrI	12110013	12110063	mfCnv188	ENSGACG00000010684	noncoding	no	freshGreaterThanMarine	deletion
chrI	12309136	12309181	mfCnv189	ENSGACG00000010697	noncoding	no	freshGreaterThanMarine	deletion
chrI	12323383	12323442	mfCnv190	ENSGACG00000010697	noncoding	no	freshGreaterThanMarine	deletion
chrI	12326079	12326206	mfCnv191	ENSGACG00000010697	noncoding	no	freshGreaterThanMarine	deletion
chrI	12326505	12326602	mfCnv192	ENSGACG00000010697	noncoding	no	freshGreaterThanMarine	deletion
chrI	12460258	12460403	mfCnv193	ENSGACG00000010795	noncoding	no	freshGreaterThanMarine	deletion
chrI	12461501	12461583	mfCnv194	ENSGACG00000010795	noncoding	no	freshGreaterThanMarine	deletion
chrI	12466492	12466745	mfCnv195	ENSGACG00000010795	noncoding	no	freshGreaterThanMarine	deletion
chrI	12489908	12489962	mfCnv196	ENSGACG00000010795	noncoding	no	freshGreaterThanMarine	deletion
chrI	13184110	13184187	mfCnv197	ENSGACG00000011119	noncoding	no	freshGreaterThanMarine	deletion
chrI	13821378	13822292	mfCnv198	ENSGACG00000011416	noncoding	yes	marineGreaterThanFresh	deletion
chrI	13836502	13836770	mfCnv199	ENSGACG00000011416	noncoding	no	marineGreaterThanFresh	deletion
chrI	14419794	14420020	mfCnv200	ENSGACG00000011579	noncoding	no	marineGreaterThanFresh	both
chrI	14439942	14440001	mfCnv201	ENSGACG00000011579	noncoding	no	marineGreaterThanFresh	deletion
chrI	15626069	15626125	mfCnv202	ENSGACG00000012085	noncoding	no	freshGreaterThanMarine	deletion
chrI	15626180	15626291	mfCnv203	ENSGACG00000012085	noncoding	no	marineGreaterThanFresh	deletion
chrI	15721868	15721924	mfCnv204	ENSGACG00000012128	noncoding	no	freshGreaterThanMarine	deletion
chrI	16503235	16503298	mfCnv205	ENSGACG00000012293	noncoding	no	freshGreaterThanMarine	deletion
chrI	16506168	16506252	mfCnv206	ENSGACG00000012293	noncoding	no	freshGreaterThanMarine	deletion
chrI	16783720	16784308	mfCnv207	ENSGACG00000012342	noncoding	no	freshGreaterThanMarine	duplication
chrI	17128030	17128446	mfCnv208	ENSGACG00000012605	noncoding	no	marineGreaterThanFresh	duplication
chrI	17404320	17404885	mfCnv209	ENSGACG00000012689	noncoding	no	freshGreaterThanMarine	both
chrI	17405023	17406287	mfCnv210	ENSGACG00000012689	noncoding	no	freshGreaterThanMarine	both
chrI	17406367	17406663	mfCnv211	ENSGACG00000012689	noncoding	no	freshGreaterThanMarine	both
chrI	17408162	17408239	mfCnv212	ENSGACG00000012689	noncoding	no	freshGreaterThanMarine	deletion
chrI	18128144	18128201	mfCnv213	ENSGACG00000013228	noncoding	no	marineGreaterThanFresh	deletion
chrI	18263567	18263637	mfCnv214	ENSGACG00000013269	noncoding	no	marineGreaterThanFresh	deletion
chrI	19948491	19948559	mfCnv215	ENSGACG00000013605	noncoding	no	marineGreaterThanFresh	deletion
chrI	20053653	20053728	mfCnv216	ENSGACG00000013605	noncoding	no	marineGreaterThanFresh	deletion
chrI	20252726	20252810	mfCnv217	ENSGACG00000013614	noncoding	no	marineGreaterThanFresh	deletion
chrI	20265616	20265654	mfCnv218	ENSGACG00000013614	noncoding	no	marineGreaterThanFresh	deletion
chrI	20373248	20373323	mfCnv219	ENSGACG00000013614	noncoding	yes	marineGreaterThanFresh	deletion
chrI	21136040	21136130	mfCnv220	ENSGACG00000013831	noncoding	no	freshGreaterThanMarine	deletion
chrI	21272442	21272524	mfCnv221	ENSGACG00000013914	noncoding	no	freshGreaterThanMarine	deletion
chrI	21400460	21400506	mfCnv222	ENSGACG00000013923	noncoding	yes	freshGreaterThanMarine	deletion
chrI	21493197	21493342	mfCnv223	ENSGACG00000013934	noncoding	no	freshGreaterThanMarine	deletion
chrI	21493392	21493476	mfCnv224	ENSGACG00000013934	noncoding	no	freshGreaterThanMarine	deletion
chrI	21496771	21497310	mfCnv225	ENSGACG00000013934	noncoding	no	freshGreaterThanMarine	deletion
chrI	21502502	21502541	mfCnv226	ENSGACG00000013934	noncoding	no	freshGreaterThanMarine	both
chrI	21528130	21528183	mfCnv227	ENSGACG00000013934	noncoding	no	freshGreaterThanMarine	deletion
chrI	21529082	21529690	mfCnv228	ENSGACG00000013934	noncoding	no	freshGreaterThanMarine	deletion
chrI	21539359	21539438	mfCnv229	ENSGACG00000013934	noncoding	no	freshGreaterThanMarine	deletion
chrI	21542061	21542130	mfCnv230	ENSGACG00000013934	noncoding	no	freshGreaterThanMarine	deletion
chrI	21547590	21547649	mfCnv231	ENSGACG00000013934	noncoding	yes	freshGreaterThanMarine	deletion
chrI	21547999	21548180	mfCnv232	ENSGACG00000013934	noncoding	no	freshGreaterThanMarine	deletion
chrI	21549768	21550015	mfCnv233	ENSGACG00000013934	noncoding	yes	freshGreaterThanMarine	deletion
chrI	21561142	21561637	mfCnv234	ENSGACG00000013934	ENSGACG00000014268	yes	freshGreaterThanMarine	deletion
chrI	21563751	21563794	mfCnv235	ENSGACG00000013934	noncoding	no	freshGreaterThanMarine	deletion
chrI	21568666	21568888	mfCnv236	ENSGACG00000013934	noncoding	no	freshGreaterThanMarine	deletion
chrI	21570178	21570317	mfCnv237	ENSGACG00000013934	noncoding	no	freshGreaterThanMarine	deletion
chrI	21571941	21572020	mfCnv238	ENSGACG00000013934	noncoding	yes	freshGreaterThanMarine	deletion
chrI	21574900	21575019	mfCnv239	ENSGACG00000013935	noncoding	no	freshGreaterThanMarine	deletion
chrI	21578623	21578668	mfCnv240	ENSGACG00000013935	noncoding	no	freshGreaterThanMarine	both
chrI	21582532	21582987	mfCnv241	ENSGACG00000013935	noncoding	no	freshGreaterThanMarine	deletion
chrI	21589049	21589139	mfCnv242	ENSGACG00000013935	noncoding	no	freshGreaterThanMarine	deletion
chrI	21590574	21591085	mfCnv243	ENSGACG00000013935	noncoding	no	freshGreaterThanMarine	deletion
chrI	21595091	21595190	mfCnv244	ENSGACG00000013935	noncoding	no	freshGreaterThanMarine	deletion
chrI	21602807	21603535	mfCnv245	ENSGACG00000013941	ENSGACG00000014289	yes	freshGreaterThanMarine	deletion
chrI	21606013	21606501	mfCnv246	ENSGACG00000013952	ENSGACG00000014289	no	freshGreaterThanMarine	deletion
chrI	21606988	21607133	mfCnv247	ENSGACG00000013952	noncoding	no	freshGreaterThanMarine	deletion
chrI	21615393	21615460	mfCnv248	ENSGACG00000013961	noncoding	no	freshGreaterThanMarine	deletion
chrI	21622137	21622219	mfCnv249	ENSGACG00000013975	noncoding	no	freshGreaterThanMarine	both
chrI	21622958	21623016	mfCnv250	ENSGACG00000013975	noncoding	no	freshGreaterThanMarine	deletion
chrI	21624115	21624255	mfCnv251	ENSGACG00000013975	ENSGACG00000014296	yes	freshGreaterThanMarine	deletion
chrI	21624863	21625205	mfCnv252	ENSGACG00000013975	noncoding	no	freshGreaterThanMarine	deletion
chrI	21629027	21629432	mfCnv253	ENSGACG00000013975	noncoding	yes	freshGreaterThanMarine	deletion
chrI	21632351	21632654	mfCnv254	ENSGACG00000013975	noncoding	no	freshGreaterThanMarine	deletion
chrI	21644928	21645011	mfCnv255	ENSGACG00000013975	noncoding	no	freshGreaterThanMarine	deletion
chrI	21646361	21646407	mfCnv256	ENSGACG00000013976	noncoding	no	freshGreaterThanMarine	both
chrI	21656164	21656229	mfCnv257	ENSGACG00000013976	noncoding	no	freshGreaterThanMarine	deletion
chrI	21667689	21668017	mfCnv258	ENSGACG00000013980	noncoding	no	freshGreaterThanMarine	deletion
chrI	21669279	21669401	mfCnv259	ENSGACG00000013980	noncoding	no	freshGreaterThanMarine	deletion
chrI	21673014	21673438	mfCnv260	ENSGACG00000013980	noncoding	no	freshGreaterThanMarine	deletion
chrI	21673870	21674384	mfCnv261	ENSGACG00000013980	noncoding	no	freshGreaterThanMarine	deletion
chrI	21676778	21676927	mfCnv262	ENSGACG00000013980	noncoding	no	freshGreaterThanMarine	both
chrI	21692084	21692183	mfCnv263	ENSGACG00000013985	noncoding	no	freshGreaterThanMarine	deletion
chrI	21695469	21695857	mfCnv264	ENSGACG00000013989	noncoding	no	freshGreaterThanMarine	deletion
chrI	21704178	21704238	mfCnv265	ENSGACG00000013999	noncoding	no	freshGreaterThanMarine	deletion
chrI	21710520	21710693	mfCnv266	ENSGACG00000013999	noncoding	yes	freshGreaterThanMarine	deletion
chrI	21714541	21714693	mfCnv267	ENSGACG00000013999	noncoding	no	freshGreaterThanMarine	deletion
chrI	21715421	21715858	mfCnv268	ENSGACG00000013999	noncoding	no	freshGreaterThanMarine	deletion
chrI	21716574	21716650	mfCnv269	ENSGACG00000013999	noncoding	no	freshGreaterThanMarine	deletion
chrI	21720310	21720775	mfCnv270	ENSGACG00000013999	noncoding	no	freshGreaterThanMarine	deletion
chrI	21721160	21721215	mfCnv271	ENSGACG00000013999	noncoding	yes	freshGreaterThanMarine	deletion
chrI	21721445	21721512	mfCnv272	ENSGACG00000013999	noncoding	no	freshGreaterThanMarine	deletion
chrI	21721659	21721766	mfCnv273	ENSGACG00000013999	noncoding	yes	freshGreaterThanMarine	deletion
chrI	21728261	21728324	mfCnv274	ENSGACG00000013999	noncoding	no	freshGreaterThanMarine	deletion
chrI	21731078	21731133	mfCnv275	ENSGACG00000013999	noncoding	no	freshGreaterThanMarine	deletion
chrI	21740323	21740367	mfCnv276	ENSGACG00000014013	noncoding	no	freshGreaterThanMarine	deletion
chrI	21743344	21743414	mfCnv277	ENSGACG00000014031	noncoding	no	freshGreaterThanMarine	deletion
chrI	21744668	21744716	mfCnv278	ENSGACG00000014031	noncoding	no	freshGreaterThanMarine	deletion
chrI	21761410	21761478	mfCnv279	ENSGACG00000014050	noncoding	yes	freshGreaterThanMarine	deletion
chrI	21787924	21788009	mfCnv280	ENSGACG00000014054	noncoding	no	freshGreaterThanMarine	deletion
chrI	21795949	21795999	mfCnv281	ENSGACG00000014054	noncoding	no	freshGreaterThanMarine	deletion
chrI	21797199	21797263	mfCnv282	ENSGACG00000014054	noncoding	no	freshGreaterThanMarine	deletion
chrI	21808500	21808537	mfCnv283	ENSGACG00000014054	noncoding	no	freshGreaterThanMarine	both
chrI	21827195	21827370	mfCnv284	ENSGACG00000014074	noncoding	no	marineGreaterThanFresh	both
chrI	21846770	21847064	mfCnv285	ENSGACG00000014091	noncoding	no	freshGreaterThanMarine	deletion
chrI	21853578	21853683	mfCnv286	ENSGACG00000014091	noncoding	no	freshGreaterThanMarine	deletion
chrI	21860264	21860840	mfCnv287	ENSGACG00000014091	noncoding	no	freshGreaterThanMarine	deletion
chrI	21868207	21868358	mfCnv288	ENSGACG00000014091	noncoding	no	freshGreaterThanMarine	deletion
chrI	21881723	21881827	mfCnv289	ENSGACG00000014108	noncoding	no	freshGreaterThanMarine	deletion
chrI	21892249	21892613	mfCnv290	ENSGACG00000014108	noncoding	no	freshGreaterThanMarine	deletion
chrI	21911772	21911887	mfCnv291	ENSGACG00000014119	noncoding	no	freshGreaterThanMarine	deletion
chrI	21914770	21914850	mfCnv292	ENSGACG00000014119	noncoding	no	freshGreaterThanMarine	deletion
chrI	21915759	21916634	mfCnv293	ENSGACG00000014119	ENSGACG00000014371	yes	freshGreaterThanMarine	deletion
chrI	21918162	21918218	mfCnv294	ENSGACG00000014119	noncoding	no	freshGreaterThanMarine	both
chrI	21918301	21918365	mfCnv295	ENSGACG00000014119	noncoding	no	freshGreaterThanMarine	deletion
chrI	21929332	21929409	mfCnv296	ENSGACG00000014135	noncoding	no	freshGreaterThanMarine	deletion
chrI	21937102	21937260	mfCnv297	ENSGACG00000014135	noncoding	no	freshGreaterThanMarine	deletion
chrI	21940536	21940627	mfCnv298	ENSGACG00000014135	noncoding	no	freshGreaterThanMarine	deletion
chrI	21942965	21943525	mfCnv299	ENSGACG00000014135	noncoding	no	freshGreaterThanMarine	deletion
chrI	21943793	21943903	mfCnv300	ENSGACG00000014135	noncoding	no	freshGreaterThanMarine	deletion
chrI	21968649	21968734	mfCnv301	ENSGACG00000014143	noncoding	no	freshGreaterThanMarine	deletion
chrI	22120642	22121068	mfCnv302	ENSGACG00000014203	noncoding	no	marineGreaterThanFresh	deletion
chrI	22452431	22452496	mfCnv303	ENSGACG00000014244	noncoding	no	marineGreaterThanFresh	deletion
chrI	22911879	22911958	mfCnv304	ENSGACG00000014373	noncoding	no	marineGreaterThanFresh	duplication
chrI	23039489	23039555	mfCnv305	ENSGACG00000014436	noncoding	no	marineGreaterThanFresh	deletion
chrI	23568150	23568191	mfCnv306	ENSGACG00000014727	noncoding	no	freshGreaterThanMarine	deletion
chrI	23569567	23569639	mfCnv307	ENSGACG00000014727	ENSGACG00000014964	no	freshGreaterThanMarine	deletion
chrI	24075735	24075779	mfCnv308	ENSGACG00000014859	noncoding	no	freshGreaterThanMarine	deletion
chrI	24904885	24904938	mfCnv309	ENSGACG00000015026	noncoding	no	freshGreaterThanMarine	deletion
chrI	25342420	25342527	mfCnv310	ENSGACG00000015030	noncoding	yes	freshGreaterThanMarine	deletion
chrI	25849710	25849774	mfCnv311	ENSGACG00000015061	noncoding	no	marineGreaterThanFresh	deletion
chrI	26457656	26457700	mfCnv312	ENSGACG00000015126	noncoding	no	marineGreaterThanFresh	deletion
chrI	26598325	26598456	mfCnv313	ENSGACG00000015180	noncoding	no	freshGreaterThanMarine	deletion
chrI	26601883	26602474	mfCnv314	ENSGACG00000015180	noncoding	no	freshGreaterThanMarine	deletion
chrI	27604444	27604492	mfCnv315	ENSGACG00000015240	noncoding	no	marineGreaterThanFresh	deletion
chrI	27660243	27661065	mfCnv316	ENSGACG00000015253	noncoding	no	freshGreaterThanMarine	duplication
chrI	27661212	27661524	mfCnv317	ENSGACG00000015253	noncoding	no	freshGreaterThanMarine	duplication
chrI	27778046	27778371	mfCnv318	ENSGACG00000015276	ENSGACG00000015574	no	freshGreaterThanMarine	deletion
chrII	346281	346361	mfCnv319	ENSGACG00000013947	noncoding	no	freshGreaterThanMarine	deletion
chrII	384694	384764	mfCnv320	ENSGACG00000013947	noncoding	yes	freshGreaterThanMarine	deletion
chrII	400361	400402	mfCnv321	ENSGACG00000013947	noncoding	no	marineGreaterThanFresh	deletion
chrII	402521	402606	mfCnv322	ENSGACG00000013947	noncoding	no	freshGreaterThanMarine	deletion
chrII	403114	403205	mfCnv323	ENSGACG00000013947	noncoding	no	freshGreaterThanMarine	deletion
chrII	410035	410198	mfCnv324	ENSGACG00000013947	ENSGACG00000014095	no	freshGreaterThanMarine	duplication
chrII	411068	411127	mfCnv325	ENSGACG00000013947	ENSGACG00000014095	yes	freshGreaterThanMarine	both
chrII	412543	412584	mfCnv326	ENSGACG00000013947	ENSGACG00000014095	no	freshGreaterThanMarine	both
chrII	922536	922827	mfCnv327	ENSGACG00000013947	noncoding	no	freshGreaterThanMarine	both
chrII	928070	928215	mfCnv328	ENSGACG00000013947	noncoding	no	freshGreaterThanMarine	deletion
chrII	1127199	1128067	mfCnv329	ENSGACG00000013947	noncoding	no	freshGreaterThanMarine	deletion
chrII	2161321	2161407	mfCnv330	ENSGACG00000014234	noncoding	no	freshGreaterThanMarine	deletion
chrII	2421022	2421134	mfCnv331	ENSGACG00000014236	noncoding	no	freshGreaterThanMarine	deletion
chrII	2440323	2440513	mfCnv332	ENSGACG00000014236	noncoding	no	freshGreaterThanMarine	deletion
chrII	2490851	2490909	mfCnv333	ENSGACG00000014236	noncoding	no	marineGreaterThanFresh	deletion
chrII	2574471	2574581	mfCnv334	ENSGACG00000014236	noncoding	no	marineGreaterThanFresh	deletion
chrII	3181688	3181736	mfCnv335	ENSGACG00000014257	noncoding	no	freshGreaterThanMarine	deletion
chrII	3353759	3353822	mfCnv336	ENSGACG00000014272	ENSGACG00000014379	no	marineGreaterThanFresh	deletion
chrII	3363337	3363506	mfCnv337	ENSGACG00000014272	noncoding	no	freshGreaterThanMarine	deletion
chrII	3410134	3410189	mfCnv338	ENSGACG00000014281	noncoding	no	freshGreaterThanMarine	deletion
chrII	3503109	3503200	mfCnv339	ENSGACG00000014319	ENSGACG00000014420	no	freshGreaterThanMarine	deletion
chrII	3616473	3616707	mfCnv340	ENSGACG00000014322	noncoding	no	freshGreaterThanMarine	duplication
chrII	3627826	3628378	mfCnv341	ENSGACG00000014322	noncoding	no	freshGreaterThanMarine	both
chrII	3636947	3637880	mfCnv342	ENSGACG00000014322	noncoding	no	marineGreaterThanFresh	duplication
chrII	3641296	3641656	mfCnv343	ENSGACG00000014322	noncoding	no	marineGreaterThanFresh	both
chrII	3673721	3674178	mfCnv344	ENSGACG00000014347	ENSGACG00000014526	no	marineGreaterThanFresh	duplication
chrII	3869830	3869918	mfCnv345	ENSGACG00000014347	noncoding	yes	freshGreaterThanMarine	deletion
chrII	3928045	3928142	mfCnv346	ENSGACG00000014347	noncoding	yes	freshGreaterThanMarine	deletion
chrII	4585013	4585069	mfCnv347	ENSGACG00000014507	noncoding	no	freshGreaterThanMarine	deletion
chrII	4760533	4760579	mfCnv348	ENSGACG00000014552	noncoding	no	marineGreaterThanFresh	deletion
chrII	6001587	6001631	mfCnv349	ENSGACG00000014795	noncoding	no	marineGreaterThanFresh	deletion
chrII	6108925	6109018	mfCnv350	ENSGACG00000014828	noncoding	no	freshGreaterThanMarine	deletion
chrII	7850002	7850054	mfCnv351	ENSGACG00000015262	noncoding	no	freshGreaterThanMarine	deletion
chrII	7851745	7851813	mfCnv352	ENSGACG00000015262	noncoding	no	freshGreaterThanMarine	deletion
chrII	8083879	8084026	mfCnv353	ENSGACG00000015262	noncoding	no	freshGreaterThanMarine	deletion
chrII	8099373	8099495	mfCnv354	ENSGACG00000015262	noncoding	no	freshGreaterThanMarine	deletion
chrII	8102714	8102765	mfCnv355	ENSGACG00000015264	noncoding	no	freshGreaterThanMarine	deletion
chrII	8112962	8113023	mfCnv356	ENSGACG00000015264	noncoding	no	freshGreaterThanMarine	deletion
chrII	8856449	8856488	mfCnv357	ENSGACG00000015374	noncoding	no	freshGreaterThanMarine	deletion
chrII	8954104	8954197	mfCnv358	ENSGACG00000015374	noncoding	no	freshGreaterThanMarine	deletion
chrII	9318788	9318849	mfCnv359	ENSGACG00000015424	noncoding	no	freshGreaterThanMarine	deletion
chrII	9773964	9774068	mfCnv360	ENSGACG00000015514	noncoding	no	freshGreaterThanMarine	deletion
chrII	10106476	10106519	mfCnv361	ENSGACG00000015573	noncoding	no	freshGreaterThanMarine	deletion
chrII	10108220	10108274	mfCnv362	ENSGACG00000015573	noncoding	no	freshGreaterThanMarine	deletion
chrII	10116474	10116517	mfCnv363	ENSGACG00000015573	noncoding	no	freshGreaterThanMarine	deletion
chrII	10325741	10325815	mfCnv364	ENSGACG00000015595	noncoding	no	freshGreaterThanMarine	deletion
chrII	10382624	10382712	mfCnv365	ENSGACG00000015616	noncoding	no	freshGreaterThanMarine	deletion
chrII	10509023	10509067	mfCnv366	ENSGACG00000015635	noncoding	no	freshGreaterThanMarine	deletion
chrII	10509591	10509665	mfCnv367	ENSGACG00000015635	noncoding	no	freshGreaterThanMarine	deletion
chrII	10611507	10611615	mfCnv368	ENSGACG00000015637	noncoding	no	freshGreaterThanMarine	deletion
chrII	10614074	10614146	mfCnv369	ENSGACG00000015637	noncoding	no	freshGreaterThanMarine	deletion
chrII	10615348	10615500	mfCnv370	ENSGACG00000015637	noncoding	no	freshGreaterThanMarine	deletion
chrII	10618789	10618913	mfCnv371	ENSGACG00000015637	noncoding	no	freshGreaterThanMarine	deletion
chrII	10630249	10630322	mfCnv372	ENSGACG00000015637	noncoding	no	freshGreaterThanMarine	deletion
chrII	10634600	10634675	mfCnv373	ENSGACG00000015637	noncoding	no	freshGreaterThanMarine	deletion
chrII	10635062	10635109	mfCnv374	ENSGACG00000015637	noncoding	no	freshGreaterThanMarine	deletion
chrII	11610354	11610779	mfCnv375	ENSGACG00000015773	noncoding	no	freshGreaterThanMarine	deletion
chrII	11661878	11661928	mfCnv376	ENSGACG00000015779	noncoding	no	freshGreaterThanMarine	deletion
chrII	11955080	11955127	mfCnv377	ENSGACG00000015782	noncoding	no	freshGreaterThanMarine	deletion
chrII	12108787	12108849	mfCnv378	ENSGACG00000015786	noncoding	no	freshGreaterThanMarine	deletion
chrII	12247004	12247050	mfCnv379	ENSGACG00000015811	noncoding	no	marineGreaterThanFresh	deletion
chrII	12913186	12913258	mfCnv380	ENSGACG00000015936	noncoding	yes	marineGreaterThanFresh	deletion
chrII	13156492	13156642	mfCnv381	ENSGACG00000015973	noncoding	no	freshGreaterThanMarine	deletion
chrII	13338962	13339015	mfCnv382	ENSGACG00000015980	noncoding	no	freshGreaterThanMarine	deletion
chrII	13372779	13373041	mfCnv383	ENSGACG00000015980	noncoding	no	freshGreaterThanMarine	deletion
chrII	13428352	13428470	mfCnv384	ENSGACG00000015980	noncoding	no	freshGreaterThanMarine	deletion
chrII	13459965	13460073	mfCnv385	ENSGACG00000015980	noncoding	no	freshGreaterThanMarine	deletion
chrII	14431717	14431863	mfCnv386	ENSGACG00000016084	noncoding	no	freshGreaterThanMarine	deletion
chrII	14469538	14469582	mfCnv387	ENSGACG00000016111	noncoding	no	freshGreaterThanMarine	deletion
chrII	14492600	14492662	mfCnv388	ENSGACG00000016118	noncoding	no	freshGreaterThanMarine	deletion
chrII	14528607	14528708	mfCnv389	ENSGACG00000016129	noncoding	no	freshGreaterThanMarine	deletion
chrII	14542071	14542152	mfCnv390	ENSGACG00000016129	noncoding	no	freshGreaterThanMarine	deletion
chrII	14544041	14544755	mfCnv391	ENSGACG00000016129	noncoding	yes	freshGreaterThanMarine	deletion
chrII	14546126	14546235	mfCnv392	ENSGACG00000016129	ENSGACG00000016295	no	freshGreaterThanMarine	deletion
chrII	14546707	14546804	mfCnv393	ENSGACG00000016129	noncoding	no	freshGreaterThanMarine	deletion
chrII	14551549	14551731	mfCnv394	ENSGACG00000016129	ENSGACG00000016298	no	freshGreaterThanMarine	deletion
chrII	14552490	14553319	mfCnv395	ENSGACG00000016129	ENSGACG00000016298	no	freshGreaterThanMarine	deletion
chrII	14553432	14553945	mfCnv396	ENSGACG00000016131	noncoding	no	freshGreaterThanMarine	deletion
chrII	14556746	14556826	mfCnv397	ENSGACG00000016131	noncoding	yes	freshGreaterThanMarine	deletion
chrII	14557442	14557513	mfCnv398	ENSGACG00000016131	noncoding	no	freshGreaterThanMarine	deletion
chrII	14558773	14558994	mfCnv399	ENSGACG00000016131	noncoding	no	freshGreaterThanMarine	deletion
chrII	14559275	14559516	mfCnv400	ENSGACG00000016131	noncoding	no	freshGreaterThanMarine	deletion
chrII	14562625	14563076	mfCnv401	ENSGACG00000016137	noncoding	yes	freshGreaterThanMarine	deletion
chrII	14563886	14564010	mfCnv402	ENSGACG00000016137	noncoding	no	freshGreaterThanMarine	deletion
chrII	14566467	14566749	mfCnv403	ENSGACG00000016137	noncoding	no	freshGreaterThanMarine	deletion
chrII	14566802	14567555	mfCnv404	ENSGACG00000016137	ENSGACG00000016298	no	freshGreaterThanMarine	deletion
chrII	14567715	14567814	mfCnv405	ENSGACG00000016137	ENSGACG00000016298	no	freshGreaterThanMarine	deletion
chrII	14567906	14568362	mfCnv406	ENSGACG00000016137	ENSGACG00000016298	yes	freshGreaterThanMarine	deletion
chrII	14568612	14569304	mfCnv407	ENSGACG00000016137	ENSGACG00000016298	no	freshGreaterThanMarine	deletion
chrII	14570553	14570803	mfCnv408	ENSGACG00000016137	noncoding	no	freshGreaterThanMarine	deletion
chrII	14570908	14571377	mfCnv409	ENSGACG00000016137	noncoding	no	freshGreaterThanMarine	deletion
chrII	14808024	14808187	mfCnv410	ENSGACG00000016215	noncoding	no	freshGreaterThanMarine	deletion
chrII	14896346	14896470	mfCnv411	ENSGACG00000016241	noncoding	no	freshGreaterThanMarine	deletion
chrII	14897951	14898278	mfCnv412	ENSGACG00000016241	noncoding	no	freshGreaterThanMarine	deletion
chrII	14899065	14899257	mfCnv413	ENSGACG00000016241	noncoding	no	freshGreaterThanMarine	deletion
chrII	14899504	14899590	mfCnv414	ENSGACG00000016241	noncoding	no	freshGreaterThanMarine	deletion
chrII	14908267	14908315	mfCnv415	ENSGACG00000016241	noncoding	no	freshGreaterThanMarine	deletion
chrII	14970677	14970759	mfCnv416	ENSGACG00000016241	noncoding	no	freshGreaterThanMarine	deletion
chrII	14976678	14976747	mfCnv417	ENSGACG00000016247	noncoding	no	freshGreaterThanMarine	deletion
chrII	14981266	14981346	mfCnv418	ENSGACG00000016247	noncoding	no	freshGreaterThanMarine	deletion
chrII	15003358	15003443	mfCnv419	ENSGACG00000016247	ENSGACG00000016365	yes	freshGreaterThanMarine	deletion
chrII	15312064	15312136	mfCnv420	ENSGACG00000016288	noncoding	no	freshGreaterThanMarine	deletion
chrII	15312250	15312327	mfCnv421	ENSGACG00000016288	noncoding	no	freshGreaterThanMarine	deletion
chrII	15523986	15524061	mfCnv422	ENSGACG00000016298	noncoding	no	freshGreaterThanMarine	deletion
chrII	15524107	15524160	mfCnv423	ENSGACG00000016298	noncoding	no	freshGreaterThanMarine	deletion
chrII	15561389	15561449	mfCnv424	ENSGACG00000016299	noncoding	no	freshGreaterThanMarine	deletion
chrII	15585693	15585741	mfCnv425	ENSGACG00000016307	noncoding	no	freshGreaterThanMarine	deletion
chrII	15779832	15779891	mfCnv426	ENSGACG00000016339	noncoding	no	freshGreaterThanMarine	deletion
chrII	15791320	15791378	mfCnv427	ENSGACG00000016339	noncoding	no	freshGreaterThanMarine	deletion
chrII	16367097	16367330	mfCnv428	ENSGACG00000016457	noncoding	no	freshGreaterThanMarine	deletion
chrII	16368714	16368899	mfCnv429	ENSGACG00000016457	noncoding	no	freshGreaterThanMarine	deletion
chrII	16369520	16369771	mfCnv430	ENSGACG00000016457	noncoding	yes	freshGreaterThanMarine	deletion
chrII	16370086	16370238	mfCnv431	ENSGACG00000016457	noncoding	yes	freshGreaterThanMarine	deletion
chrII	16370350	16370769	mfCnv432	ENSGACG00000016457	noncoding	no	freshGreaterThanMarine	deletion
chrII	16377606	16378023	mfCnv433	ENSGACG00000016467	noncoding	no	freshGreaterThanMarine	deletion
chrII	16378023	16378075	mfCnv434	ENSGACG00000016467	noncoding	no	marineGreaterThanFresh	deletion
chrII	16380752	16380942	mfCnv435	ENSGACG00000016467	noncoding	no	freshGreaterThanMarine	deletion
chrII	16381744	16381872	mfCnv436	ENSGACG00000016467	noncoding	no	freshGreaterThanMarine	deletion
chrII	16382028	16382222	mfCnv437	ENSGACG00000016467	noncoding	no	freshGreaterThanMarine	deletion
chrII	16382539	16382759	mfCnv438	ENSGACG00000016467	noncoding	no	freshGreaterThanMarine	deletion
chrII	16383872	16384228	mfCnv439	ENSGACG00000016467	noncoding	no	freshGreaterThanMarine	deletion
chrII	16384487	16386731	mfCnv440	ENSGACG00000016467	noncoding	yes	freshGreaterThanMarine	deletion
chrII	16399128	16399469	mfCnv441	ENSGACG00000016476	noncoding	yes	freshGreaterThanMarine	deletion
chrII	16399813	16399937	mfCnv442	ENSGACG00000016476	noncoding	no	freshGreaterThanMarine	deletion
chrII	16400174	16400223	mfCnv443	ENSGACG00000016476	noncoding	no	freshGreaterThanMarine	deletion
chrII	16400442	16400548	mfCnv444	ENSGACG00000016476	noncoding	no	freshGreaterThanMarine	deletion
chrII	16400616	16400748	mfCnv445	ENSGACG00000016476	noncoding	no	freshGreaterThanMarine	deletion
chrII	16401184	16401264	mfCnv446	ENSGACG00000016476	noncoding	no	freshGreaterThanMarine	deletion
chrII	16402637	16403006	mfCnv447	ENSGACG00000016481	noncoding	no	freshGreaterThanMarine	deletion
chrII	16403252	16403343	mfCnv448	ENSGACG00000016481	noncoding	no	freshGreaterThanMarine	deletion
chrII	16403651	16403806	mfCnv449	ENSGACG00000016481	noncoding	no	freshGreaterThanMarine	deletion
chrII	16413841	16414075	mfCnv450	ENSGACG00000016484	noncoding	no	freshGreaterThanMarine	deletion
chrII	16414292	16414518	mfCnv451	ENSGACG00000016484	noncoding	no	freshGreaterThanMarine	deletion
chrII	16414631	16414804	mfCnv452	ENSGACG00000016484	noncoding	no	freshGreaterThanMarine	deletion
chrII	16414978	16415524	mfCnv453	ENSGACG00000016484	noncoding	no	freshGreaterThanMarine	deletion
chrII	16418041	16419641	mfCnv454	ENSGACG00000016484	noncoding	yes	marineGreaterThanFresh	deletion
chrII	16420323	16420869	mfCnv455	ENSGACG00000016484	noncoding	no	marineGreaterThanFresh	deletion
chrII	17408142	17408214	mfCnv456	ENSGACG00000016583	noncoding	yes	marineGreaterThanFresh	deletion
chrII	18664071	18664142	mfCnv457	ENSGACG00000016702	noncoding	yes	marineGreaterThanFresh	deletion
chrII	19207281	19207342	mfCnv458	ENSGACG00000016752	noncoding	no	marineGreaterThanFresh	deletion
chrII	19341602	19341671	mfCnv459	ENSGACG00000016770	noncoding	no	marineGreaterThanFresh	deletion
chrII	19381040	19381122	mfCnv460	ENSGACG00000016773	noncoding	no	marineGreaterThanFresh	deletion
chrII	19526391	19526474	mfCnv461	ENSGACG00000016871	noncoding	no	freshGreaterThanMarine	deletion
chrII	19711630	19711740	mfCnv462	ENSGACG00000016895	ENSGACG00000017073	yes	marineGreaterThanFresh	deletion
chrII	20200336	20200392	mfCnv463	ENSGACG00000016992	noncoding	no	marineGreaterThanFresh	deletion
chrII	20927362	20927508	mfCnv464	ENSGACG00000017094	noncoding	no	marineGreaterThanFresh	deletion
chrII	21005247	21005464	mfCnv465	ENSGACG00000017096	noncoding	no	freshGreaterThanMarine	deletion
chrII	21490459	21490607	mfCnv466	ENSGACG00000017115	noncoding	no	marineGreaterThanFresh	deletion
chrII	21494320	21494860	mfCnv467	ENSGACG00000017115	noncoding	no	marineGreaterThanFresh	deletion
chrII	21523210	21523524	mfCnv468	ENSGACG00000017116	noncoding	no	marineGreaterThanFresh	deletion
chrII	21524403	21525644	mfCnv469	ENSGACG00000017116	noncoding	no	marineGreaterThanFresh	deletion
chrII	21935111	21935192	mfCnv470	ENSGACG00000017161	noncoding	no	freshGreaterThanMarine	deletion
chrII	21997384	21997454	mfCnv471	ENSGACG00000017161	noncoding	no	marineGreaterThanFresh	deletion
chrII	22013147	22013292	mfCnv472	ENSGACG00000017161	noncoding	no	marineGreaterThanFresh	deletion
chrII	22134224	22134262	mfCnv473	ENSGACG00000017167	noncoding	no	marineGreaterThanFresh	deletion
chrII	22157529	22157593	mfCnv474	ENSGACG00000017167	noncoding	yes	freshGreaterThanMarine	deletion
chrII	22446361	22446428	mfCnv475	ENSGACG00000017254	noncoding	no	marineGreaterThanFresh	deletion
chrII	22917244	22917315	mfCnv476	ENSGACG00000017350	noncoding	yes	marineGreaterThanFresh	deletion
chrII	23141166	23141230	mfCnv477	ENSGACG00000017436	noncoding	no	marineGreaterThanFresh	deletion
chrII	23173463	23173724	mfCnv478	ENSGACG00000017448	noncoding	no	freshGreaterThanMarine	deletion
chrIII	96115	96169	mfCnv479	ENSGACG00000012369	noncoding	no	freshGreaterThanMarine	deletion
chrIII	101441	101619	mfCnv480	ENSGACG00000012369	noncoding	no	freshGreaterThanMarine	deletion
chrIII	101842	101940	mfCnv481	ENSGACG00000012369	noncoding	no	freshGreaterThanMarine	deletion
chrIII	102154	102315	mfCnv482	ENSGACG00000012369	noncoding	no	freshGreaterThanMarine	deletion
chrIII	102909	103076	mfCnv483	ENSGACG00000012369	noncoding	no	freshGreaterThanMarine	deletion
chrIII	106216	106281	mfCnv484	ENSGACG00000012369	noncoding	no	freshGreaterThanMarine	deletion
chrIII	111576	111667	mfCnv485	ENSGACG00000012369	noncoding	no	freshGreaterThanMarine	deletion
chrIII	112037	112230	mfCnv486	ENSGACG00000012369	noncoding	no	freshGreaterThanMarine	deletion
chrIII	112757	112911	mfCnv487	ENSGACG00000012369	noncoding	no	freshGreaterThanMarine	deletion
chrIII	113043	113308	mfCnv488	ENSGACG00000012369	noncoding	no	freshGreaterThanMarine	deletion
chrIII	116506	116637	mfCnv489	ENSGACG00000012369	noncoding	yes	freshGreaterThanMarine	deletion
chrIII	121917	122098	mfCnv490	ENSGACG00000012369	noncoding	no	freshGreaterThanMarine	deletion
chrIII	221444	221511	mfCnv491	ENSGACG00000012369	noncoding	no	freshGreaterThanMarine	deletion
chrIII	250416	250506	mfCnv492	ENSGACG00000012369	noncoding	yes	freshGreaterThanMarine	deletion
chrIII	251570	251693	mfCnv493	ENSGACG00000012369	noncoding	no	freshGreaterThanMarine	deletion
chrIII	312189	312310	mfCnv494	ENSGACG00000012369	noncoding	no	freshGreaterThanMarine	deletion
chrIII	373910	373958	mfCnv495	ENSGACG00000012369	noncoding	yes	marineGreaterThanFresh	deletion
chrIII	408495	409236	mfCnv496	ENSGACG00000012369	noncoding	no	marineGreaterThanFresh	deletion
chrIII	716143	716214	mfCnv497	ENSGACG00000012369	noncoding	no	freshGreaterThanMarine	deletion
chrIII	718393	718707	mfCnv498	ENSGACG00000012369	noncoding	no	freshGreaterThanMarine	deletion
chrIII	977470	977525	mfCnv499	ENSGACG00000012369	noncoding	no	marineGreaterThanFresh	deletion
chrIII	1529898	1531352	mfCnv500	ENSGACG00000013017	noncoding	no	marineGreaterThanFresh	deletion
chrIII	2056160	2056204	mfCnv501	ENSGACG00000013253	noncoding	no	marineGreaterThanFresh	deletion
chrIII	4187307	4187792	mfCnv502	ENSGACG00000014265	ENSGACG00000014413	no	marineGreaterThanFresh	deletion
chrIII	4326406	4326710	mfCnv503	ENSGACG00000014303	noncoding	no	marineGreaterThanFresh	deletion
chrIII	4327120	4327176	mfCnv504	ENSGACG00000014303	noncoding	no	marineGreaterThanFresh	deletion
chrIII	4327568	4327675	mfCnv505	ENSGACG00000014303	noncoding	no	marineGreaterThanFresh	deletion
chrIII	4503420	4503775	mfCnv506	ENSGACG00000014303	noncoding	no	marineGreaterThanFresh	deletion
chrIII	4505000	4505716	mfCnv507	ENSGACG00000014303	noncoding	no	marineGreaterThanFresh	deletion
chrIII	4506298	4509142	mfCnv508	ENSGACG00000014303	noncoding	no	marineGreaterThanFresh	deletion
chrIII	4511104	4512287	mfCnv509	ENSGACG00000014303	noncoding	no	marineGreaterThanFresh	deletion
chrIII	4514499	4515915	mfCnv510	ENSGACG00000014303	noncoding	no	marineGreaterThanFresh	deletion
chrIII	4705270	4705334	mfCnv511	ENSGACG00000014317	noncoding	yes	marineGreaterThanFresh	deletion
chrIII	4901009	4901104	mfCnv512	ENSGACG00000014339	noncoding	no	marineGreaterThanFresh	deletion
chrIII	5035865	5036214	mfCnv513	ENSGACG00000014381	noncoding	no	freshGreaterThanMarine	deletion
chrIII	5870183	5870364	mfCnv514	ENSGACG00000014494	noncoding	no	freshGreaterThanMarine	deletion
chrIII	5872827	5873013	mfCnv515	ENSGACG00000014494	noncoding	no	freshGreaterThanMarine	deletion
chrIII	5875286	5875439	mfCnv516	ENSGACG00000014494	noncoding	no	freshGreaterThanMarine	deletion
chrIII	5875587	5875708	mfCnv517	ENSGACG00000014494	noncoding	no	freshGreaterThanMarine	deletion
chrIII	5879529	5879602	mfCnv518	ENSGACG00000014494	noncoding	no	freshGreaterThanMarine	deletion
chrIII	5904113	5904980	mfCnv519	ENSGACG00000014494	noncoding	no	marineGreaterThanFresh	deletion
chrIII	6381177	6381219	mfCnv520	ENSGACG00000014678	noncoding	no	freshGreaterThanMarine	deletion
chrIII	6722828	6723150	mfCnv521	ENSGACG00000014766	noncoding	no	freshGreaterThanMarine	duplication
chrIII	7781320	7781401	mfCnv522	ENSGACG00000015049	noncoding	no	marineGreaterThanFresh	deletion
chrIII	8160567	8160617	mfCnv523	ENSGACG00000015189	noncoding	no	freshGreaterThanMarine	deletion
chrIII	8226412	8226549	mfCnv524	ENSGACG00000015219	noncoding	no	freshGreaterThanMarine	deletion
chrIII	8279650	8279939	mfCnv525	ENSGACG00000015231	noncoding	no	marineGreaterThanFresh	deletion
chrIII	9251351	9251425	mfCnv526	ENSGACG00000015479	noncoding	no	marineGreaterThanFresh	deletion
chrIII	10158025	10158269	mfCnv527	ENSGACG00000016007	noncoding	no	freshGreaterThanMarine	both
chrIII	10868016	10868067	mfCnv528	ENSGACG00000016242	noncoding	no	marineGreaterThanFresh	deletion
chrIII	11648857	11648975	mfCnv529	ENSGACG00000016497	noncoding	yes	freshGreaterThanMarine	deletion
chrIII	11990599	11990713	mfCnv530	ENSGACG00000016612	noncoding	no	freshGreaterThanMarine	deletion
chrIII	12645838	12645987	mfCnv531	ENSGACG00000016730	noncoding	no	freshGreaterThanMarine	deletion
chrIII	12649656	12649705	mfCnv532	ENSGACG00000016730	noncoding	no	marineGreaterThanFresh	deletion
chrIII	12653206	12653432	mfCnv533	ENSGACG00000016740	noncoding	no	freshGreaterThanMarine	deletion
chrIII	12812745	12812803	mfCnv534	ENSGACG00000016795	noncoding	yes	freshGreaterThanMarine	deletion
chrIII	13770874	13770960	mfCnv535	ENSGACG00000017058	noncoding	no	marineGreaterThanFresh	deletion
chrIII	13834918	13835056	mfCnv536	ENSGACG00000017090	noncoding	no	freshGreaterThanMarine	deletion
chrIII	14150833	14152294	mfCnv537	ENSGACG00000017188	ENSGACG00000017481	yes	marineGreaterThanFresh	duplication
chrIII	14152915	14153577	mfCnv538	ENSGACG00000017188	ENSGACG00000017481	yes	marineGreaterThanFresh	duplication
chrIII	14153611	14154360	mfCnv539	ENSGACG00000017188	ENSGACG00000017481	yes	marineGreaterThanFresh	duplication
chrIII	14408154	14408219	mfCnv540	ENSGACG00000017269	noncoding	yes	freshGreaterThanMarine	deletion
chrIII	14534121	14534214	mfCnv541	ENSGACG00000017300	noncoding	no	freshGreaterThanMarine	deletion
chrIII	14537830	14537916	mfCnv542	ENSGACG00000017300	noncoding	no	marineGreaterThanFresh	deletion
chrIII	14598287	14599103	mfCnv543	ENSGACG00000017309	noncoding	no	marineGreaterThanFresh	duplication
chrIII	14599777	14600718	mfCnv544	ENSGACG00000017309	noncoding	no	marineGreaterThanFresh	duplication
chrIII	14613034	14614276	mfCnv545	ENSGACG00000017309	noncoding	yes	marineGreaterThanFresh	duplication
chrIII	14615115	14616952	mfCnv546	ENSGACG00000017309	noncoding	yes	marineGreaterThanFresh	duplication
chrIII	14623359	14624443	mfCnv547	ENSGACG00000017327	noncoding	yes	marineGreaterThanFresh	duplication
chrIII	14628537	14630222	mfCnv548	ENSGACG00000017327	noncoding	yes	marineGreaterThanFresh	duplication
chrIII	14634691	14635050	mfCnv549	ENSGACG00000017327	noncoding	no	marineGreaterThanFresh	duplication
chrIII	14687597	14687643	mfCnv550	ENSGACG00000017336	noncoding	no	marineGreaterThanFresh	deletion
chrIII	14704830	14705203	mfCnv551	ENSGACG00000017361	ENSGACG00000017590	yes	marineGreaterThanFresh	both
chrIII	14709992	14710543	mfCnv552	ENSGACG00000017380	ENSGACG00000017590	yes	marineGreaterThanFresh	duplication
chrIII	14710581	14712927	mfCnv553	ENSGACG00000017380	noncoding	yes	marineGreaterThanFresh	duplication
chrIII	14713080	14713366	mfCnv554	ENSGACG00000017380	noncoding	yes	marineGreaterThanFresh	duplication
chrIII	14713520	14713817	mfCnv555	ENSGACG00000017380	noncoding	yes	marineGreaterThanFresh	duplication
chrIII	14714006	14714594	mfCnv556	ENSGACG00000017380	noncoding	no	marineGreaterThanFresh	duplication
chrIII	14714664	14715239	mfCnv557	ENSGACG00000017380	noncoding	no	marineGreaterThanFresh	duplication
chrIII	14715443	14715624	mfCnv558	ENSGACG00000017380	noncoding	no	marineGreaterThanFresh	duplication
chrIII	14715690	14716929	mfCnv559	ENSGACG00000017380	noncoding	yes	marineGreaterThanFresh	duplication
chrIII	14717031	14718072	mfCnv560	ENSGACG00000017380	noncoding	yes	marineGreaterThanFresh	duplication
chrIII	14718277	14718433	mfCnv561	ENSGACG00000017380	noncoding	no	marineGreaterThanFresh	duplication
chrIII	14718596	14718745	mfCnv562	ENSGACG00000017380	noncoding	no	marineGreaterThanFresh	duplication
chrIII	14718914	14719194	mfCnv563	ENSGACG00000017380	noncoding	no	marineGreaterThanFresh	duplication
chrIII	14719265	14719700	mfCnv564	ENSGACG00000017380	noncoding	yes	marineGreaterThanFresh	duplication
chrIII	14720285	14720542	mfCnv565	ENSGACG00000017380	noncoding	no	marineGreaterThanFresh	both
chrIII	14720809	14721038	mfCnv566	ENSGACG00000017380	noncoding	no	marineGreaterThanFresh	duplication
chrIII	14721078	14721309	mfCnv567	ENSGACG00000017380	noncoding	no	marineGreaterThanFresh	duplication
chrIII	14722743	14722922	mfCnv568	ENSGACG00000017380	noncoding	no	marineGreaterThanFresh	both
chrIII	14723084	14723550	mfCnv569	ENSGACG00000017380	noncoding	yes	marineGreaterThanFresh	both
chrIII	14723722	14724720	mfCnv570	ENSGACG00000017380	noncoding	no	marineGreaterThanFresh	both
chrIII	14724765	14725272	mfCnv571	ENSGACG00000017380	noncoding	no	marineGreaterThanFresh	both
chrIII	14729914	14731697	mfCnv572	ENSGACG00000017380	noncoding	no	marineGreaterThanFresh	duplication
chrIII	14732756	14733137	mfCnv573	ENSGACG00000017383	noncoding	no	marineGreaterThanFresh	duplication
chrIII	14945552	14945606	mfCnv574	ENSGACG00000017431	noncoding	no	marineGreaterThanFresh	deletion
chrIII	15016449	15016926	mfCnv575	ENSGACG00000017437	noncoding	no	marineGreaterThanFresh	deletion
chrIII	15038754	15039249	mfCnv576	ENSGACG00000017446	noncoding	no	marineGreaterThanFresh	deletion
chrIII	15042809	15043106	mfCnv577	ENSGACG00000017446	noncoding	no	marineGreaterThanFresh	both
chrIII	15047707	15047955	mfCnv578	ENSGACG00000017451	noncoding	no	marineGreaterThanFresh	deletion
chrIII	15097827	15098290	mfCnv579	ENSGACG00000017473	noncoding	no	marineGreaterThanFresh	deletion
chrIII	15365258	15365391	mfCnv580	ENSGACG00000017560	noncoding	no	freshGreaterThanMarine	deletion
chrIII	15410187	15410294	mfCnv581	ENSGACG00000017565	noncoding	no	freshGreaterThanMarine	deletion
chrIII	15442416	15442652	mfCnv582	ENSGACG00000017568	noncoding	no	freshGreaterThanMarine	deletion
chrIII	15443260	15443552	mfCnv583	ENSGACG00000017575	noncoding	no	freshGreaterThanMarine	deletion
chrIII	15456795	15457014	mfCnv584	ENSGACG00000017575	ENSGACG00000017688	no	freshGreaterThanMarine	deletion
chrIII	15485677	15485732	mfCnv585	ENSGACG00000017582	noncoding	no	freshGreaterThanMarine	deletion
chrIII	15513095	15513205	mfCnv586	ENSGACG00000017582	noncoding	no	freshGreaterThanMarine	deletion
chrIII	15556200	15556297	mfCnv587	ENSGACG00000017584	noncoding	no	marineGreaterThanFresh	duplication
chrIII	15571022	15571153	mfCnv588	ENSGACG00000017584	noncoding	no	freshGreaterThanMarine	deletion
chrIII	15571275	15571456	mfCnv589	ENSGACG00000017584	noncoding	no	freshGreaterThanMarine	deletion
chrIII	15582118	15582191	mfCnv590	ENSGACG00000017584	noncoding	no	freshGreaterThanMarine	deletion
chrIII	15594925	15595782	mfCnv591	ENSGACG00000017584	ENSGACG00000017700	no	marineGreaterThanFresh	both
chrIII	15595782	15595944	mfCnv592	ENSGACG00000017584	ENSGACG00000017700	no	marineGreaterThanFresh	both
chrIII	15608779	15609315	mfCnv593	ENSGACG00000017584	noncoding	no	freshGreaterThanMarine	deletion
chrIII	15610565	15610675	mfCnv594	ENSGACG00000017584	noncoding	no	freshGreaterThanMarine	deletion
chrIII	15620437	15620609	mfCnv595	ENSGACG00000017584	noncoding	no	freshGreaterThanMarine	deletion
chrIII	15670279	15670485	mfCnv596	ENSGACG00000017584	noncoding	no	freshGreaterThanMarine	deletion
chrIII	15697111	15697423	mfCnv597	ENSGACG00000017590	noncoding	no	marineGreaterThanFresh	deletion
chrIII	15722356	15722543	mfCnv598	ENSGACG00000017595	noncoding	no	freshGreaterThanMarine	deletion
chrIII	15727733	15728005	mfCnv599	ENSGACG00000017595	noncoding	no	freshGreaterThanMarine	deletion
chrIII	15959471	15959610	mfCnv600	ENSGACG00000017648	noncoding	no	marineGreaterThanFresh	deletion
chrIII	15971778	15971957	mfCnv601	ENSGACG00000017648	noncoding	no	freshGreaterThanMarine	deletion
chrIII	15972142	15972227	mfCnv602	ENSGACG00000017648	noncoding	no	freshGreaterThanMarine	deletion
chrIII	16009533	16010625	mfCnv603	ENSGACG00000017656	noncoding	no	freshGreaterThanMarine	duplication
chrIII	16012303	16012868	mfCnv604	ENSGACG00000017656	noncoding	no	freshGreaterThanMarine	duplication
chrIII	16013349	16013618	mfCnv605	ENSGACG00000017656	noncoding	no	freshGreaterThanMarine	duplication
chrIII	16773326	16773381	mfCnv606	ENSGACG00000017705	noncoding	no	freshGreaterThanMarine	deletion
chrIII	16773507	16773978	mfCnv607	ENSGACG00000017705	noncoding	no	freshGreaterThanMarine	deletion
chrIII	16774177	16774816	mfCnv608	ENSGACG00000017705	noncoding	no	freshGreaterThanMarine	deletion
chrIII	16777441	16777535	mfCnv609	ENSGACG00000017705	noncoding	no	freshGreaterThanMarine	deletion
chrIII	16778143	16778224	mfCnv610	ENSGACG00000017705	ENSGACG00000018003	no	freshGreaterThanMarine	deletion
chrIII	16778587	16778898	mfCnv611	ENSGACG00000017705	ENSGACG00000018003	no	freshGreaterThanMarine	deletion
chrIII	16778998	16779411	mfCnv612	ENSGACG00000017705	noncoding	no	freshGreaterThanMarine	deletion
chrIII	16783718	16784727	mfCnv613	ENSGACG00000017710	ENSGACG00000018003	no	freshGreaterThanMarine	deletion
chrIII	16784956	16785036	mfCnv614	ENSGACG00000017710	noncoding	no	freshGreaterThanMarine	deletion
chrIV	201084	201151	mfCnv615	ENSGACG00000016217	noncoding	no	freshGreaterThanMarine	deletion
chrIV	643164	643207	mfCnv616	ENSGACG00000016217	noncoding	yes	marineGreaterThanFresh	deletion
chrIV	952152	952208	mfCnv617	ENSGACG00000016217	noncoding	no	freshGreaterThanMarine	deletion
chrIV	2021826	2021896	mfCnv618	ENSGACG00000016411	noncoding	no	freshGreaterThanMarine	deletion
chrIV	2337934	2337987	mfCnv619	ENSGACG00000016437	noncoding	no	freshGreaterThanMarine	deletion
chrIV	2796543	2797118	mfCnv620	ENSGACG00000016483	noncoding	no	freshGreaterThanMarine	duplication
chrIV	2798170	2798944	mfCnv621	ENSGACG00000016483	noncoding	no	freshGreaterThanMarine	duplication
chrIV	2799990	2800246	mfCnv622	ENSGACG00000016483	noncoding	no	freshGreaterThanMarine	duplication
chrIV	2996139	2996274	mfCnv623	ENSGACG00000016498	noncoding	no	marineGreaterThanFresh	deletion
chrIV	2996324	2996403	mfCnv624	ENSGACG00000016498	noncoding	no	marineGreaterThanFresh	deletion
chrIV	2996507	2997097	mfCnv625	ENSGACG00000016498	noncoding	no	marineGreaterThanFresh	deletion
chrIV	2997190	2997490	mfCnv626	ENSGACG00000016498	noncoding	no	marineGreaterThanFresh	deletion
chrIV	2998222	2998290	mfCnv627	ENSGACG00000016498	noncoding	no	marineGreaterThanFresh	deletion
chrIV	3243650	3243752	mfCnv628	ENSGACG00000016550	noncoding	yes	marineGreaterThanFresh	deletion
chrIV	3400797	3400877	mfCnv629	ENSGACG00000016587	noncoding	no	freshGreaterThanMarine	deletion
chrIV	4135188	4135291	mfCnv630	ENSGACG00000016693	noncoding	no	marineGreaterThanFresh	deletion
chrIV	4944849	4944944	mfCnv631	ENSGACG00000016796	noncoding	no	marineGreaterThanFresh	deletion
chrIV	6834525	6834957	mfCnv632	ENSGACG00000017183	noncoding	no	marineGreaterThanFresh	both
chrIV	7447016	7447067	mfCnv633	ENSGACG00000017349	noncoding	no	freshGreaterThanMarine	deletion
chrIV	7451074	7451274	mfCnv634	ENSGACG00000017349	noncoding	no	freshGreaterThanMarine	deletion
chrIV	7546235	7546337	mfCnv635	ENSGACG00000017367	noncoding	no	freshGreaterThanMarine	deletion
chrIV	7652245	7652296	mfCnv636	ENSGACG00000017424	noncoding	no	freshGreaterThanMarine	deletion
chrIV	7768300	7768519	mfCnv637	ENSGACG00000017467	noncoding	no	marineGreaterThanFresh	deletion
chrIV	7778621	7778997	mfCnv638	ENSGACG00000017467	noncoding	yes	marineGreaterThanFresh	deletion
chrIV	7805834	7806277	mfCnv639	ENSGACG00000017467	noncoding	no	marineGreaterThanFresh	deletion
chrIV	7814986	7815160	mfCnv640	ENSGACG00000017467	noncoding	no	marineGreaterThanFresh	deletion
chrIV	7815626	7816038	mfCnv641	ENSGACG00000017467	noncoding	no	marineGreaterThanFresh	deletion
chrIV	7846930	7846980	mfCnv642	ENSGACG00000017467	noncoding	no	freshGreaterThanMarine	deletion
chrIV	7847634	7847682	mfCnv643	ENSGACG00000017467	noncoding	no	freshGreaterThanMarine	deletion
chrIV	7848882	7848936	mfCnv644	ENSGACG00000017467	noncoding	no	freshGreaterThanMarine	deletion
chrIV	7855273	7855317	mfCnv645	ENSGACG00000017467	noncoding	yes	freshGreaterThanMarine	deletion
chrIV	7855994	7856056	mfCnv646	ENSGACG00000017467	noncoding	no	freshGreaterThanMarine	deletion
chrIV	7857127	7857177	mfCnv647	ENSGACG00000017467	noncoding	no	freshGreaterThanMarine	deletion
chrIV	7857217	7857328	mfCnv648	ENSGACG00000017467	noncoding	no	freshGreaterThanMarine	deletion
chrIV	7860716	7860827	mfCnv649	ENSGACG00000017467	noncoding	no	freshGreaterThanMarine	deletion
chrIV	7861738	7861915	mfCnv650	ENSGACG00000017467	noncoding	no	freshGreaterThanMarine	deletion
chrIV	7862457	7862526	mfCnv651	ENSGACG00000017467	noncoding	no	freshGreaterThanMarine	deletion
chrIV	7863610	7863700	mfCnv652	ENSGACG00000017467	noncoding	no	freshGreaterThanMarine	deletion
chrIV	7864304	7864376	mfCnv653	ENSGACG00000017467	noncoding	no	freshGreaterThanMarine	deletion
chrIV	7865021	7865088	mfCnv654	ENSGACG00000017467	noncoding	no	freshGreaterThanMarine	deletion
chrIV	7865213	7865280	mfCnv655	ENSGACG00000017467	noncoding	no	freshGreaterThanMarine	deletion
chrIV	7867487	7867536	mfCnv656	ENSGACG00000017467	noncoding	no	freshGreaterThanMarine	deletion
chrIV	7867593	7867708	mfCnv657	ENSGACG00000017467	noncoding	no	freshGreaterThanMarine	deletion
chrIV	7868123	7868268	mfCnv658	ENSGACG00000017467	noncoding	no	freshGreaterThanMarine	deletion
chrIV	7870694	7870865	mfCnv659	ENSGACG00000017467	noncoding	no	freshGreaterThanMarine	deletion
chrIV	7871812	7871889	mfCnv660	ENSGACG00000017467	noncoding	no	freshGreaterThanMarine	deletion
chrIV	7872216	7872259	mfCnv661	ENSGACG00000017467	noncoding	no	freshGreaterThanMarine	deletion
chrIV	7875104	7875166	mfCnv662	ENSGACG00000017467	noncoding	no	freshGreaterThanMarine	deletion
chrIV	7877657	7877706	mfCnv663	ENSGACG00000017467	noncoding	no	freshGreaterThanMarine	deletion
chrIV	7888386	7888440	mfCnv664	ENSGACG00000017467	noncoding	no	freshGreaterThanMarine	deletion
chrIV	7908216	7908266	mfCnv665	ENSGACG00000017470	noncoding	no	freshGreaterThanMarine	deletion
chrIV	7912252	7912311	mfCnv666	ENSGACG00000017470	noncoding	no	freshGreaterThanMarine	deletion
chrIV	7976139	7976180	mfCnv667	ENSGACG00000017470	noncoding	no	freshGreaterThanMarine	deletion
chrIV	7977343	7977472	mfCnv668	ENSGACG00000017470	noncoding	no	freshGreaterThanMarine	deletion
chrIV	7978529	7978580	mfCnv669	ENSGACG00000017470	noncoding	no	freshGreaterThanMarine	deletion
chrIV	7986297	7986372	mfCnv670	ENSGACG00000017470	noncoding	no	freshGreaterThanMarine	deletion
chrIV	7992162	7992212	mfCnv671	ENSGACG00000017470	noncoding	yes	freshGreaterThanMarine	deletion
chrIV	8010369	8010461	mfCnv672	ENSGACG00000017470	noncoding	no	freshGreaterThanMarine	deletion
chrIV	8010873	8010923	mfCnv673	ENSGACG00000017470	noncoding	no	freshGreaterThanMarine	deletion
chrIV	8013062	8013119	mfCnv674	ENSGACG00000017470	noncoding	no	freshGreaterThanMarine	deletion
chrIV	8013220	8013282	mfCnv675	ENSGACG00000017470	noncoding	no	freshGreaterThanMarine	deletion
chrIV	8013879	8013944	mfCnv676	ENSGACG00000017470	noncoding	no	freshGreaterThanMarine	deletion
chrIV	8030964	8031015	mfCnv677	ENSGACG00000017470	noncoding	no	freshGreaterThanMarine	deletion
chrIV	8050056	8050227	mfCnv678	ENSGACG00000017470	noncoding	no	freshGreaterThanMarine	deletion
chrIV	8071819	8071900	mfCnv679	ENSGACG00000017470	noncoding	no	freshGreaterThanMarine	deletion
chrIV	8072789	8072857	mfCnv680	ENSGACG00000017470	noncoding	no	freshGreaterThanMarine	deletion
chrIV	8132648	8132729	mfCnv681	ENSGACG00000017470	noncoding	no	freshGreaterThanMarine	deletion
chrIV	8133782	8133849	mfCnv682	ENSGACG00000017470	noncoding	no	freshGreaterThanMarine	deletion
chrIV	8138129	8138182	mfCnv683	ENSGACG00000017470	noncoding	no	freshGreaterThanMarine	deletion
chrIV	8140732	8140800	mfCnv684	ENSGACG00000017470	noncoding	no	freshGreaterThanMarine	deletion
chrIV	8140881	8140936	mfCnv685	ENSGACG00000017470	noncoding	no	freshGreaterThanMarine	deletion
chrIV	8144879	8144934	mfCnv686	ENSGACG00000017470	noncoding	no	freshGreaterThanMarine	deletion
chrIV	8293366	8293415	mfCnv687	ENSGACG00000017470	noncoding	no	freshGreaterThanMarine	deletion
chrIV	8329370	8329606	mfCnv688	ENSGACG00000017470	noncoding	no	freshGreaterThanMarine	deletion
chrIV	8332930	8333016	mfCnv689	ENSGACG00000017470	noncoding	no	freshGreaterThanMarine	deletion
chrIV	8342060	8342315	mfCnv690	ENSGACG00000017470	noncoding	yes	freshGreaterThanMarine	deletion
chrIV	8356978	8357022	mfCnv691	ENSGACG00000017470	noncoding	no	freshGreaterThanMarine	deletion
chrIV	8398553	8398596	mfCnv692	ENSGACG00000017470	noncoding	no	freshGreaterThanMarine	deletion
chrIV	8417194	8417236	mfCnv693	ENSGACG00000017470	noncoding	no	freshGreaterThanMarine	deletion
chrIV	8418004	8418064	mfCnv694	ENSGACG00000017470	noncoding	no	freshGreaterThanMarine	deletion
chrIV	8426120	8426302	mfCnv695	ENSGACG00000017470	noncoding	no	freshGreaterThanMarine	deletion
chrIV	8426409	8426486	mfCnv696	ENSGACG00000017470	noncoding	no	freshGreaterThanMarine	deletion
chrIV	8510277	8510356	mfCnv697	ENSGACG00000017493	noncoding	no	freshGreaterThanMarine	deletion
chrIV	8518463	8518516	mfCnv698	ENSGACG00000017493	noncoding	no	freshGreaterThanMarine	deletion
chrIV	8540106	8540272	mfCnv699	ENSGACG00000017497	noncoding	no	freshGreaterThanMarine	deletion
chrIV	8935775	8935823	mfCnv700	ENSGACG00000017524	noncoding	no	freshGreaterThanMarine	deletion
chrIV	8950824	8950922	mfCnv701	ENSGACG00000017530	noncoding	no	freshGreaterThanMarine	deletion
chrIV	9027084	9027175	mfCnv702	ENSGACG00000017532	noncoding	no	freshGreaterThanMarine	deletion
chrIV	9038359	9038432	mfCnv703	ENSGACG00000017551	noncoding	no	freshGreaterThanMarine	deletion
chrIV	9231610	9231674	mfCnv704	ENSGACG00000017605	noncoding	no	freshGreaterThanMarine	deletion
chrIV	9243216	9243329	mfCnv705	ENSGACG00000017618	noncoding	no	freshGreaterThanMarine	deletion
chrIV	9262753	9262814	mfCnv706	ENSGACG00000017628	noncoding	yes	freshGreaterThanMarine	deletion
chrIV	9274407	9274526	mfCnv707	ENSGACG00000017637	noncoding	no	freshGreaterThanMarine	deletion
chrIV	9328378	9328422	mfCnv708	ENSGACG00000017671	noncoding	no	freshGreaterThanMarine	deletion
chrIV	9341066	9341130	mfCnv709	ENSGACG00000017671	noncoding	no	freshGreaterThanMarine	deletion
chrIV	9346639	9346862	mfCnv710	ENSGACG00000017671	ENSGACG00000017837	no	freshGreaterThanMarine	deletion
chrIV	9420781	9420839	mfCnv711	ENSGACG00000017686	noncoding	no	freshGreaterThanMarine	deletion
chrIV	9507538	9507601	mfCnv712	ENSGACG00000017689	noncoding	no	freshGreaterThanMarine	deletion
chrIV	10330682	10330752	mfCnv713	ENSGACG00000017836	noncoding	no	freshGreaterThanMarine	deletion
chrIV	10347947	10347991	mfCnv714	ENSGACG00000017837	noncoding	no	freshGreaterThanMarine	deletion
chrIV	10412022	10412098	mfCnv715	ENSGACG00000017863	noncoding	no	freshGreaterThanMarine	deletion
chrIV	10450135	10450231	mfCnv716	ENSGACG00000017869	noncoding	no	freshGreaterThanMarine	deletion
chrIV	10453001	10453089	mfCnv717	ENSGACG00000017869	noncoding	no	freshGreaterThanMarine	deletion
chrIV	10458665	10458724	mfCnv718	ENSGACG00000017869	noncoding	no	freshGreaterThanMarine	deletion
chrIV	10501314	10501490	mfCnv719	ENSGACG00000017874	noncoding	no	freshGreaterThanMarine	deletion
chrIV	10502122	10502173	mfCnv720	ENSGACG00000017874	noncoding	no	freshGreaterThanMarine	deletion
chrIV	10573310	10573383	mfCnv721	ENSGACG00000017882	noncoding	no	freshGreaterThanMarine	deletion
chrIV	10672555	10672654	mfCnv722	ENSGACG00000017891	noncoding	no	freshGreaterThanMarine	deletion
chrIV	10716436	10718008	mfCnv723	ENSGACG00000017896	noncoding	yes	marineGreaterThanFresh	duplication
chrIV	10718130	10719328	mfCnv724	ENSGACG00000017896	noncoding	no	marineGreaterThanFresh	duplication
chrIV	10896402	10896474	mfCnv725	ENSGACG00000017910	noncoding	no	freshGreaterThanMarine	deletion
chrIV	10932239	10932448	mfCnv726	ENSGACG00000017913	noncoding	no	freshGreaterThanMarine	deletion
chrIV	10956421	10956592	mfCnv727	ENSGACG00000017914	noncoding	no	freshGreaterThanMarine	deletion
chrIV	11039545	11039592	mfCnv728	ENSGACG00000017915	noncoding	no	freshGreaterThanMarine	deletion
chrIV	11280065	11280128	mfCnv729	ENSGACG00000017921	noncoding	no	freshGreaterThanMarine	deletion
chrIV	11326239	11326329	mfCnv730	ENSGACG00000017928	noncoding	no	freshGreaterThanMarine	deletion
chrIV	11375622	11375685	mfCnv731	ENSGACG00000017934	noncoding	no	freshGreaterThanMarine	deletion
chrIV	11409549	11409612	mfCnv732	ENSGACG00000017934	noncoding	no	freshGreaterThanMarine	deletion
chrIV	11438107	11438183	mfCnv733	ENSGACG00000017934	noncoding	no	freshGreaterThanMarine	deletion
chrIV	11455220	11455301	mfCnv734	ENSGACG00000017939	noncoding	no	freshGreaterThanMarine	deletion
chrIV	11460939	11461048	mfCnv735	ENSGACG00000017939	ENSGACG00000018098	no	freshGreaterThanMarine	deletion
chrIV	11503715	11503771	mfCnv736	ENSGACG00000017939	noncoding	no	marineGreaterThanFresh	deletion
chrIV	11622896	11622949	mfCnv737	ENSGACG00000017963	noncoding	no	freshGreaterThanMarine	deletion
chrIV	11623325	11623377	mfCnv738	ENSGACG00000017963	noncoding	no	freshGreaterThanMarine	deletion
chrIV	11655060	11655118	mfCnv739	ENSGACG00000017976	noncoding	no	freshGreaterThanMarine	deletion
chrIV	11678962	11679155	mfCnv740	ENSGACG00000017981	noncoding	no	freshGreaterThanMarine	deletion
chrIV	11681396	11681738	mfCnv741	ENSGACG00000017981	noncoding	no	freshGreaterThanMarine	deletion
chrIV	11691565	11692063	mfCnv742	ENSGACG00000017988	noncoding	no	freshGreaterThanMarine	deletion
chrIV	11805562	11805769	mfCnv743	ENSGACG00000018004	noncoding	no	freshGreaterThanMarine	deletion
chrIV	11859927	11860002	mfCnv744	ENSGACG00000018004	noncoding	no	freshGreaterThanMarine	deletion
chrIV	11878176	11878420	mfCnv745	ENSGACG00000018004	noncoding	no	freshGreaterThanMarine	deletion
chrIV	11892556	11892605	mfCnv746	ENSGACG00000018004	noncoding	no	freshGreaterThanMarine	deletion
chrIV	11902846	11902947	mfCnv747	ENSGACG00000018005	noncoding	no	freshGreaterThanMarine	deletion
chrIV	11915520	11915571	mfCnv748	ENSGACG00000018007	noncoding	yes	freshGreaterThanMarine	deletion
chrIV	11925956	11926010	mfCnv749	ENSGACG00000018011	noncoding	no	freshGreaterThanMarine	deletion
chrIV	11928782	11929001	mfCnv750	ENSGACG00000018011	noncoding	no	freshGreaterThanMarine	deletion
chrIV	11943438	11943497	mfCnv751	ENSGACG00000018015	noncoding	yes	freshGreaterThanMarine	deletion
chrIV	12001032	12001562	mfCnv752	ENSGACG00000018029	noncoding	no	marineGreaterThanFresh	deletion
chrIV	12140384	12140931	mfCnv753	ENSGACG00000018050	noncoding	no	marineGreaterThanFresh	deletion
chrIV	12144349	12144774	mfCnv754	ENSGACG00000018050	noncoding	no	marineGreaterThanFresh	deletion
chrIV	12217312	12217358	mfCnv755	ENSGACG00000018050	noncoding	no	freshGreaterThanMarine	deletion
chrIV	12231427	12231889	mfCnv756	ENSGACG00000018050	noncoding	no	marineGreaterThanFresh	deletion
chrIV	12328005	12328224	mfCnv757	ENSGACG00000018083	noncoding	no	freshGreaterThanMarine	deletion
chrIV	12390399	12390486	mfCnv758	ENSGACG00000018115	noncoding	no	freshGreaterThanMarine	deletion
chrIV	12433627	12433704	mfCnv759	ENSGACG00000018115	noncoding	no	freshGreaterThanMarine	deletion
chrIV	12751366	12751472	mfCnv760	ENSGACG00000018161	noncoding	no	freshGreaterThanMarine	deletion
chrIV	12761674	12761747	mfCnv761	ENSGACG00000018161	noncoding	no	freshGreaterThanMarine	deletion
chrIV	12773935	12774023	mfCnv762	ENSGACG00000018167	noncoding	no	freshGreaterThanMarine	deletion
chrIV	12776223	12776287	mfCnv763	ENSGACG00000018167	noncoding	no	freshGreaterThanMarine	deletion
chrIV	12776356	12776414	mfCnv764	ENSGACG00000018167	noncoding	no	freshGreaterThanMarine	deletion
chrIV	12776777	12776846	mfCnv765	ENSGACG00000018167	noncoding	no	freshGreaterThanMarine	deletion
chrIV	12789826	12789890	mfCnv766	ENSGACG00000018167	noncoding	no	freshGreaterThanMarine	deletion
chrIV	12790042	12790110	mfCnv767	ENSGACG00000018167	noncoding	no	freshGreaterThanMarine	deletion
chrIV	12802506	12802563	mfCnv768	ENSGACG00000018167	noncoding	no	freshGreaterThanMarine	deletion
chrIV	12804142	12804190	mfCnv769	ENSGACG00000018167	noncoding	no	freshGreaterThanMarine	deletion
chrIV	12806079	12806139	mfCnv770	ENSGACG00000018167	noncoding	yes	freshGreaterThanMarine	deletion
chrIV	12817825	12817855	mfCnv771	ENSGACG00000018169	noncoding	no	freshGreaterThanMarine	both
chrIV	12818087	12818221	mfCnv772	ENSGACG00000018169	noncoding	no	freshGreaterThanMarine	deletion
chrIV	12818453	12818840	mfCnv773	ENSGACG00000018169	noncoding	no	freshGreaterThanMarine	deletion
chrIV	12821218	12821269	mfCnv774	ENSGACG00000018169	noncoding	no	freshGreaterThanMarine	deletion
chrIV	12822518	12822558	mfCnv775	ENSGACG00000018169	noncoding	no	freshGreaterThanMarine	deletion
chrIV	12823020	12823081	mfCnv776	ENSGACG00000018175	noncoding	no	freshGreaterThanMarine	deletion
chrIV	12825003	12825090	mfCnv777	ENSGACG00000018175	noncoding	no	freshGreaterThanMarine	deletion
chrIV	12827681	12827750	mfCnv778	ENSGACG00000018175	noncoding	no	freshGreaterThanMarine	deletion
chrIV	12828075	12828154	mfCnv779	ENSGACG00000018175	noncoding	no	freshGreaterThanMarine	deletion
chrIV	12828879	12828925	mfCnv780	ENSGACG00000018175	noncoding	no	freshGreaterThanMarine	deletion
chrIV	12845790	12845913	mfCnv781	ENSGACG00000018187	noncoding	no	freshGreaterThanMarine	deletion
chrIV	12847242	12847295	mfCnv782	ENSGACG00000018188	noncoding	no	freshGreaterThanMarine	deletion
chrIV	12852303	12852394	mfCnv783	ENSGACG00000018200	noncoding	no	freshGreaterThanMarine	deletion
chrIV	12863162	12863207	mfCnv784	ENSGACG00000018209	noncoding	no	freshGreaterThanMarine	deletion
chrIV	12871122	12871180	mfCnv785	ENSGACG00000018209	noncoding	no	freshGreaterThanMarine	deletion
chrIV	12891231	12891311	mfCnv786	ENSGACG00000018213	noncoding	no	freshGreaterThanMarine	deletion
chrIV	12894128	12894197	mfCnv787	ENSGACG00000018213	noncoding	no	freshGreaterThanMarine	deletion
chrIV	12894353	12894492	mfCnv788	ENSGACG00000018213	noncoding	no	freshGreaterThanMarine	deletion
chrIV	12901161	12901227	mfCnv789	ENSGACG00000018213	noncoding	no	freshGreaterThanMarine	deletion
chrIV	12902588	12902670	mfCnv790	ENSGACG00000018213	noncoding	no	freshGreaterThanMarine	deletion
chrIV	12908273	12908729	mfCnv791	ENSGACG00000018213	noncoding	no	freshGreaterThanMarine	deletion
chrIV	12916088	12916138	mfCnv792	ENSGACG00000018213	noncoding	yes	freshGreaterThanMarine	deletion
chrIV	12933128	12933182	mfCnv793	ENSGACG00000018218	noncoding	no	freshGreaterThanMarine	deletion
chrIV	12954671	12954782	mfCnv794	ENSGACG00000018221	noncoding	no	freshGreaterThanMarine	deletion
chrIV	12982367	12982463	mfCnv795	ENSGACG00000018224	noncoding	no	freshGreaterThanMarine	deletion
chrIV	12988292	12988342	mfCnv796	ENSGACG00000018224	noncoding	no	freshGreaterThanMarine	deletion
chrIV	12989579	12989703	mfCnv797	ENSGACG00000018224	noncoding	no	freshGreaterThanMarine	deletion
chrIV	12994263	12994401	mfCnv798	ENSGACG00000018224	noncoding	no	freshGreaterThanMarine	deletion
chrIV	12995847	12996338	mfCnv799	ENSGACG00000018224	noncoding	no	freshGreaterThanMarine	deletion
chrIV	12996674	12996750	mfCnv800	ENSGACG00000018224	noncoding	no	freshGreaterThanMarine	deletion
chrIV	13066152	13066248	mfCnv801	ENSGACG00000018242	noncoding	no	freshGreaterThanMarine	deletion
chrIV	13164952	13165004	mfCnv802	ENSGACG00000018253	noncoding	no	freshGreaterThanMarine	deletion
chrIV	13167212	13167267	mfCnv803	ENSGACG00000018253	noncoding	no	freshGreaterThanMarine	deletion
chrIV	13172818	13173372	mfCnv804	ENSGACG00000018253	noncoding	no	freshGreaterThanMarine	deletion
chrIV	13234496	13234565	mfCnv805	ENSGACG00000018256	noncoding	no	freshGreaterThanMarine	deletion
chrIV	13237215	13237273	mfCnv806	ENSGACG00000018256	noncoding	no	freshGreaterThanMarine	deletion
chrIV	13243186	13243231	mfCnv807	ENSGACG00000018256	noncoding	no	freshGreaterThanMarine	deletion
chrIV	13264165	13264392	mfCnv808	ENSGACG00000018256	noncoding	no	freshGreaterThanMarine	deletion
chrIV	13280894	13281072	mfCnv809	ENSGACG00000018256	noncoding	no	freshGreaterThanMarine	deletion
chrIV	13305418	13305457	mfCnv810	ENSGACG00000018258	noncoding	no	freshGreaterThanMarine	deletion
chrIV	13308142	13308206	mfCnv811	ENSGACG00000018258	noncoding	no	freshGreaterThanMarine	deletion
chrIV	13309096	13309143	mfCnv812	ENSGACG00000018258	noncoding	no	freshGreaterThanMarine	deletion
chrIV	13309434	13309487	mfCnv813	ENSGACG00000018258	noncoding	no	freshGreaterThanMarine	deletion
chrIV	13332483	13332540	mfCnv814	ENSGACG00000018264	noncoding	no	freshGreaterThanMarine	deletion
chrIV	13335524	13335622	mfCnv815	ENSGACG00000018264	noncoding	no	freshGreaterThanMarine	deletion
chrIV	13356415	13356537	mfCnv816	ENSGACG00000018271	noncoding	no	freshGreaterThanMarine	deletion
chrIV	13357987	13358125	mfCnv817	ENSGACG00000018271	noncoding	no	freshGreaterThanMarine	deletion
chrIV	13405283	13405344	mfCnv818	ENSGACG00000018281	noncoding	no	freshGreaterThanMarine	deletion
chrIV	13420776	13420875	mfCnv819	ENSGACG00000018281	noncoding	no	freshGreaterThanMarine	deletion
chrIV	13468611	13468689	mfCnv820	ENSGACG00000018292	noncoding	no	freshGreaterThanMarine	deletion
chrIV	13469703	13469767	mfCnv821	ENSGACG00000018292	noncoding	no	freshGreaterThanMarine	deletion
chrIV	13476471	13476527	mfCnv822	ENSGACG00000018292	noncoding	no	freshGreaterThanMarine	deletion
chrIV	13476882	13476956	mfCnv823	ENSGACG00000018296	noncoding	no	freshGreaterThanMarine	deletion
chrIV	13477330	13477382	mfCnv824	ENSGACG00000018296	noncoding	no	freshGreaterThanMarine	deletion
chrIV	13479114	13479310	mfCnv825	ENSGACG00000018296	noncoding	no	freshGreaterThanMarine	deletion
chrIV	13480048	13480220	mfCnv826	ENSGACG00000018296	noncoding	no	freshGreaterThanMarine	deletion
chrIV	13539674	13539730	mfCnv827	ENSGACG00000018296	noncoding	no	freshGreaterThanMarine	deletion
chrIV	13545187	13545262	mfCnv828	ENSGACG00000018296	noncoding	no	freshGreaterThanMarine	deletion
chrIV	13622975	13623704	mfCnv829	ENSGACG00000018300	noncoding	no	freshGreaterThanMarine	deletion
chrIV	13632848	13632909	mfCnv830	ENSGACG00000018300	noncoding	no	freshGreaterThanMarine	deletion
chrIV	13642720	13642803	mfCnv831	ENSGACG00000018300	noncoding	no	freshGreaterThanMarine	deletion
chrIV	13809657	13809719	mfCnv832	ENSGACG00000018312	noncoding	no	freshGreaterThanMarine	deletion
chrIV	13879751	13879837	mfCnv833	ENSGACG00000018318	noncoding	no	freshGreaterThanMarine	deletion
chrIV	13880093	13880142	mfCnv834	ENSGACG00000018318	noncoding	no	freshGreaterThanMarine	deletion
chrIV	13887482	13887567	mfCnv835	ENSGACG00000018318	noncoding	no	freshGreaterThanMarine	deletion
chrIV	13912783	13912860	mfCnv836	ENSGACG00000018320	noncoding	no	freshGreaterThanMarine	deletion
chrIV	13920241	13920333	mfCnv837	ENSGACG00000018320	noncoding	no	freshGreaterThanMarine	deletion
chrIV	13944895	13944974	mfCnv838	ENSGACG00000018324	noncoding	no	freshGreaterThanMarine	deletion
chrIV	13957410	13957566	mfCnv839	ENSGACG00000018334	noncoding	no	freshGreaterThanMarine	deletion
chrIV	13957798	13957902	mfCnv840	ENSGACG00000018334	noncoding	no	freshGreaterThanMarine	deletion
chrIV	13958539	13959027	mfCnv841	ENSGACG00000018334	noncoding	no	freshGreaterThanMarine	deletion
chrIV	13959289	13959386	mfCnv842	ENSGACG00000018334	noncoding	no	freshGreaterThanMarine	deletion
chrIV	13969477	13969532	mfCnv843	ENSGACG00000018334	noncoding	no	freshGreaterThanMarine	deletion
chrIV	13976890	13976938	mfCnv844	ENSGACG00000018337	noncoding	no	freshGreaterThanMarine	deletion
chrIV	13980062	13980198	mfCnv845	ENSGACG00000018337	noncoding	no	freshGreaterThanMarine	deletion
chrIV	13982236	13982354	mfCnv846	ENSGACG00000018337	noncoding	no	freshGreaterThanMarine	deletion
chrIV	13984793	13984873	mfCnv847	ENSGACG00000018337	noncoding	no	freshGreaterThanMarine	deletion
chrIV	13993466	13993793	mfCnv848	ENSGACG00000018337	noncoding	no	freshGreaterThanMarine	deletion
chrIV	13996268	13996334	mfCnv849	ENSGACG00000018337	noncoding	no	freshGreaterThanMarine	deletion
chrIV	14065917	14066224	mfCnv850	ENSGACG00000018337	noncoding	yes	freshGreaterThanMarine	deletion
chrIV	14080855	14080955	mfCnv851	ENSGACG00000018337	noncoding	no	freshGreaterThanMarine	deletion
chrIV	14158616	14158671	mfCnv852	ENSGACG00000018337	noncoding	no	freshGreaterThanMarine	deletion
chrIV	14171677	14171725	mfCnv853	ENSGACG00000018344	noncoding	no	freshGreaterThanMarine	deletion
chrIV	14179545	14180150	mfCnv854	ENSGACG00000018344	noncoding	no	freshGreaterThanMarine	deletion
chrIV	14187226	14187273	mfCnv855	ENSGACG00000018344	noncoding	no	freshGreaterThanMarine	deletion
chrIV	14191518	14191688	mfCnv856	ENSGACG00000018344	noncoding	no	freshGreaterThanMarine	deletion
chrIV	14192906	14192988	mfCnv857	ENSGACG00000018344	noncoding	no	freshGreaterThanMarine	deletion
chrIV	14193043	14193127	mfCnv858	ENSGACG00000018344	noncoding	no	freshGreaterThanMarine	deletion
chrIV	14195304	14195369	mfCnv859	ENSGACG00000018344	noncoding	no	freshGreaterThanMarine	deletion
chrIV	14198858	14198920	mfCnv860	ENSGACG00000018344	noncoding	no	freshGreaterThanMarine	deletion
chrIV	14199059	14199200	mfCnv861	ENSGACG00000018344	noncoding	no	freshGreaterThanMarine	deletion
chrIV	14214548	14214623	mfCnv862	ENSGACG00000018344	noncoding	no	freshGreaterThanMarine	deletion
chrIV	14216094	14216176	mfCnv863	ENSGACG00000018344	noncoding	no	freshGreaterThanMarine	deletion
chrIV	14323471	14323564	mfCnv864	ENSGACG00000018362	noncoding	no	freshGreaterThanMarine	deletion
chrIV	14324096	14324155	mfCnv865	ENSGACG00000018362	noncoding	no	freshGreaterThanMarine	deletion
chrIV	14327676	14327834	mfCnv866	ENSGACG00000018362	noncoding	no	freshGreaterThanMarine	deletion
chrIV	14328268	14328340	mfCnv867	ENSGACG00000018362	noncoding	no	freshGreaterThanMarine	deletion
chrIV	14328543	14328741	mfCnv868	ENSGACG00000018362	noncoding	no	freshGreaterThanMarine	deletion
chrIV	14329010	14329244	mfCnv869	ENSGACG00000018362	noncoding	no	freshGreaterThanMarine	deletion
chrIV	14329379	14329476	mfCnv870	ENSGACG00000018362	noncoding	no	freshGreaterThanMarine	deletion
chrIV	14365578	14366048	mfCnv871	ENSGACG00000018362	noncoding	no	marineGreaterThanFresh	deletion
chrIV	14384808	14384908	mfCnv872	ENSGACG00000018379	noncoding	no	marineGreaterThanFresh	deletion
chrIV	14386210	14386938	mfCnv873	ENSGACG00000018379	noncoding	no	marineGreaterThanFresh	deletion
chrIV	14437015	14437085	mfCnv874	ENSGACG00000018387	noncoding	no	freshGreaterThanMarine	deletion
chrIV	14456038	14456203	mfCnv875	ENSGACG00000018390	noncoding	no	freshGreaterThanMarine	deletion
chrIV	14467068	14467133	mfCnv876	ENSGACG00000018390	noncoding	no	freshGreaterThanMarine	deletion
chrIV	14469139	14469195	mfCnv877	ENSGACG00000018390	noncoding	no	freshGreaterThanMarine	deletion
chrIV	14473812	14473871	mfCnv878	ENSGACG00000018390	noncoding	no	freshGreaterThanMarine	deletion
chrIV	14474011	14474134	mfCnv879	ENSGACG00000018390	noncoding	no	freshGreaterThanMarine	deletion
chrIV	14500690	14500921	mfCnv880	ENSGACG00000018391	noncoding	no	freshGreaterThanMarine	deletion
chrIV	14501600	14501664	mfCnv881	ENSGACG00000018391	noncoding	no	freshGreaterThanMarine	deletion
chrIV	14503160	14503372	mfCnv882	ENSGACG00000018391	noncoding	no	freshGreaterThanMarine	deletion
chrIV	14519626	14519713	mfCnv883	ENSGACG00000018391	noncoding	no	freshGreaterThanMarine	deletion
chrIV	14545053	14545445	mfCnv884	ENSGACG00000018408	noncoding	no	freshGreaterThanMarine	deletion
chrIV	14545591	14546006	mfCnv885	ENSGACG00000018408	noncoding	no	freshGreaterThanMarine	deletion
chrIV	14546248	14547061	mfCnv886	ENSGACG00000018408	noncoding	no	freshGreaterThanMarine	deletion
chrIV	14547863	14548457	mfCnv887	ENSGACG00000018408	noncoding	no	freshGreaterThanMarine	deletion
chrIV	14548707	14548926	mfCnv888	ENSGACG00000018408	noncoding	no	freshGreaterThanMarine	deletion
chrIV	14549026	14549463	mfCnv889	ENSGACG00000018408	noncoding	no	freshGreaterThanMarine	deletion
chrIV	14549955	14550256	mfCnv890	ENSGACG00000018408	noncoding	no	freshGreaterThanMarine	deletion
chrIV	14550381	14550574	mfCnv891	ENSGACG00000018408	noncoding	no	freshGreaterThanMarine	deletion
chrIV	14550638	14550784	mfCnv892	ENSGACG00000018408	noncoding	no	freshGreaterThanMarine	deletion
chrIV	14550972	14551103	mfCnv893	ENSGACG00000018408	noncoding	no	freshGreaterThanMarine	deletion
chrIV	14551348	14551481	mfCnv894	ENSGACG00000018408	noncoding	no	freshGreaterThanMarine	deletion
chrIV	14551546	14551670	mfCnv895	ENSGACG00000018408	noncoding	no	freshGreaterThanMarine	deletion
chrIV	14552473	14552529	mfCnv896	ENSGACG00000018408	noncoding	no	freshGreaterThanMarine	deletion
chrIV	14753581	14754630	mfCnv897	ENSGACG00000018408	noncoding	no	marineGreaterThanFresh	deletion
chrIV	14814728	14815482	mfCnv898	ENSGACG00000018408	noncoding	no	marineGreaterThanFresh	deletion
chrIV	14872495	14872639	mfCnv899	ENSGACG00000018418	noncoding	no	freshGreaterThanMarine	deletion
chrIV	14945824	14945978	mfCnv900	ENSGACG00000018433	noncoding	yes	freshGreaterThanMarine	deletion
chrIV	15041529	15041588	mfCnv901	ENSGACG00000018445	noncoding	no	freshGreaterThanMarine	deletion
chrIV	15053584	15053651	mfCnv902	ENSGACG00000018450	noncoding	no	freshGreaterThanMarine	deletion
chrIV	15060928	15060991	mfCnv903	ENSGACG00000018450	noncoding	no	freshGreaterThanMarine	deletion
chrIV	15061082	15061304	mfCnv904	ENSGACG00000018450	noncoding	no	freshGreaterThanMarine	deletion
chrIV	15061665	15061721	mfCnv905	ENSGACG00000018450	noncoding	no	freshGreaterThanMarine	deletion
chrIV	15084939	15085012	mfCnv906	ENSGACG00000018450	noncoding	no	freshGreaterThanMarine	deletion
chrIV	15085091	15085280	mfCnv907	ENSGACG00000018450	noncoding	no	freshGreaterThanMarine	deletion
chrIV	15348599	15348901	mfCnv908	ENSGACG00000018480	noncoding	no	freshGreaterThanMarine	deletion
chrIV	15351356	15351474	mfCnv909	ENSGACG00000018480	noncoding	no	freshGreaterThanMarine	deletion
chrIV	15468349	15468391	mfCnv910	ENSGACG00000018483	noncoding	no	freshGreaterThanMarine	deletion
chrIV	15480855	15480934	mfCnv911	ENSGACG00000018483	noncoding	no	freshGreaterThanMarine	deletion
chrIV	15493733	15493780	mfCnv912	ENSGACG00000018483	noncoding	no	freshGreaterThanMarine	deletion
chrIV	15515422	15515466	mfCnv913	ENSGACG00000018484	noncoding	no	freshGreaterThanMarine	deletion
chrIV	15522767	15522872	mfCnv914	ENSGACG00000018487	noncoding	no	freshGreaterThanMarine	deletion
chrIV	15546942	15547014	mfCnv915	ENSGACG00000018490	noncoding	no	freshGreaterThanMarine	deletion
chrIV	15574066	15574161	mfCnv916	ENSGACG00000018493	noncoding	no	freshGreaterThanMarine	deletion
chrIV	15674482	15674605	mfCnv917	ENSGACG00000018493	noncoding	no	freshGreaterThanMarine	deletion
chrIV	15696509	15696576	mfCnv918	ENSGACG00000018493	noncoding	no	freshGreaterThanMarine	deletion
chrIV	15710561	15710614	mfCnv919	ENSGACG00000018493	noncoding	no	freshGreaterThanMarine	deletion
chrIV	15736526	15736575	mfCnv920	ENSGACG00000018493	noncoding	yes	freshGreaterThanMarine	deletion
chrIV	15749941	15750435	mfCnv921	ENSGACG00000018493	noncoding	no	freshGreaterThanMarine	deletion
chrIV	15750502	15751734	mfCnv922	ENSGACG00000018493	noncoding	no	freshGreaterThanMarine	deletion
chrIV	15752033	15752167	mfCnv923	ENSGACG00000018493	noncoding	no	freshGreaterThanMarine	deletion
chrIV	15752446	15753978	mfCnv924	ENSGACG00000018493	noncoding	no	freshGreaterThanMarine	deletion
chrIV	15755204	15755330	mfCnv925	ENSGACG00000018493	noncoding	no	freshGreaterThanMarine	deletion
chrIV	15783392	15783513	mfCnv926	ENSGACG00000018493	noncoding	no	freshGreaterThanMarine	deletion
chrIV	15787364	15787415	mfCnv927	ENSGACG00000018493	noncoding	no	freshGreaterThanMarine	deletion
chrIV	15788279	15788323	mfCnv928	ENSGACG00000018493	noncoding	no	freshGreaterThanMarine	deletion
chrIV	15792037	15792130	mfCnv929	ENSGACG00000018493	noncoding	no	freshGreaterThanMarine	deletion
chrIV	15793515	15793615	mfCnv930	ENSGACG00000018493	noncoding	no	freshGreaterThanMarine	deletion
chrIV	15820160	15820226	mfCnv931	ENSGACG00000018493	noncoding	no	freshGreaterThanMarine	deletion
chrIV	15861458	15861517	mfCnv932	ENSGACG00000018493	noncoding	no	freshGreaterThanMarine	deletion
chrIV	15862010	15862404	mfCnv933	ENSGACG00000018493	noncoding	yes	freshGreaterThanMarine	deletion
chrIV	15864669	15864744	mfCnv934	ENSGACG00000018493	noncoding	no	freshGreaterThanMarine	deletion
chrIV	15873162	15873257	mfCnv935	ENSGACG00000018493	noncoding	no	freshGreaterThanMarine	deletion
chrIV	15924471	15924661	mfCnv936	ENSGACG00000018498	noncoding	no	freshGreaterThanMarine	deletion
chrIV	15926117	15926175	mfCnv937	ENSGACG00000018498	noncoding	no	freshGreaterThanMarine	deletion
chrIV	15927042	15927255	mfCnv938	ENSGACG00000018498	noncoding	no	freshGreaterThanMarine	deletion
chrIV	15937866	15937940	mfCnv939	ENSGACG00000018498	noncoding	yes	freshGreaterThanMarine	deletion
chrIV	15961078	15961139	mfCnv940	ENSGACG00000018498	noncoding	no	freshGreaterThanMarine	deletion
chrIV	15961310	15961608	mfCnv941	ENSGACG00000018498	noncoding	no	freshGreaterThanMarine	deletion
chrIV	16002639	16002713	mfCnv942	ENSGACG00000018498	noncoding	no	freshGreaterThanMarine	deletion
chrIV	16005846	16005963	mfCnv943	ENSGACG00000018498	noncoding	no	freshGreaterThanMarine	deletion
chrIV	16012131	16012390	mfCnv944	ENSGACG00000018498	noncoding	no	freshGreaterThanMarine	deletion
chrIV	16034991	16035195	mfCnv945	ENSGACG00000018498	noncoding	no	freshGreaterThanMarine	deletion
chrIV	16043027	16043086	mfCnv946	ENSGACG00000018498	noncoding	no	freshGreaterThanMarine	deletion
chrIV	16154775	16154835	mfCnv947	ENSGACG00000018525	noncoding	no	freshGreaterThanMarine	deletion
chrIV	16183573	16183658	mfCnv948	ENSGACG00000018525	noncoding	no	freshGreaterThanMarine	deletion
chrIV	16243861	16243936	mfCnv949	ENSGACG00000018534	noncoding	no	marineGreaterThanFresh	deletion
chrIV	16346954	16347367	mfCnv950	ENSGACG00000018534	noncoding	no	freshGreaterThanMarine	deletion
chrIV	16403649	16404181	mfCnv951	ENSGACG00000018540	noncoding	yes	marineGreaterThanFresh	deletion
chrIV	16722906	16722966	mfCnv952	ENSGACG00000018571	noncoding	no	freshGreaterThanMarine	deletion
chrIV	16737607	16737714	mfCnv953	ENSGACG00000018574	noncoding	no	freshGreaterThanMarine	deletion
chrIV	16745029	16745207	mfCnv954	ENSGACG00000018574	ENSGACG00000018748	no	freshGreaterThanMarine	deletion
chrIV	16757060	16757156	mfCnv955	ENSGACG00000018579	noncoding	no	freshGreaterThanMarine	deletion
chrIV	16783241	16783939	mfCnv956	ENSGACG00000018580	noncoding	no	marineGreaterThanFresh	deletion
chrIV	16865552	16865837	mfCnv957	ENSGACG00000018605	noncoding	no	marineGreaterThanFresh	deletion
chrIV	17365255	17365383	mfCnv958	ENSGACG00000018696	noncoding	no	marineGreaterThanFresh	both
chrIV	17650133	17651348	mfCnv959	ENSGACG00000018742	ENSGACG00000018765	yes	marineGreaterThanFresh	duplication
chrIV	17653195	17653739	mfCnv960	ENSGACG00000018742	ENSGACG00000018765	no	marineGreaterThanFresh	duplication
chrIV	17656612	17657325	mfCnv961	ENSGACG00000018742	noncoding	no	marineGreaterThanFresh	both
chrIV	17659641	17660098	mfCnv962	ENSGACG00000018742	noncoding	no	marineGreaterThanFresh	both
chrIV	17660538	17661005	mfCnv963	ENSGACG00000018742	noncoding	no	marineGreaterThanFresh	duplication
chrIV	17663974	17665258	mfCnv964	ENSGACG00000018742	noncoding	no	marineGreaterThanFresh	both
chrIV	17665406	17665662	mfCnv965	ENSGACG00000018742	noncoding	no	marineGreaterThanFresh	duplication
chrIV	17666240	17667500	mfCnv966	ENSGACG00000018742	noncoding	no	marineGreaterThanFresh	duplication
chrIV	17690065	17691217	mfCnv967	ENSGACG00000018742	noncoding	no	marineGreaterThanFresh	deletion
chrIV	18052494	18052645	mfCnv968	ENSGACG00000018760	noncoding	no	freshGreaterThanMarine	deletion
chrIV	18102700	18102775	mfCnv969	ENSGACG00000018760	noncoding	no	freshGreaterThanMarine	deletion
chrIV	18118692	18118787	mfCnv970	ENSGACG00000018760	noncoding	no	freshGreaterThanMarine	deletion
chrIV	18150906	18151095	mfCnv971	ENSGACG00000018760	noncoding	no	freshGreaterThanMarine	deletion
chrIV	18158504	18158548	mfCnv972	ENSGACG00000018760	noncoding	no	freshGreaterThanMarine	deletion
chrIV	18194384	18194935	mfCnv973	ENSGACG00000018760	noncoding	no	freshGreaterThanMarine	deletion
chrIV	18227263	18227328	mfCnv974	ENSGACG00000018760	noncoding	no	freshGreaterThanMarine	deletion
chrIV	18258183	18258224	mfCnv975	ENSGACG00000018760	noncoding	no	freshGreaterThanMarine	deletion
chrIV	18311230	18311282	mfCnv976	ENSGACG00000018760	noncoding	no	freshGreaterThanMarine	deletion
chrIV	18311394	18311461	mfCnv977	ENSGACG00000018760	noncoding	no	freshGreaterThanMarine	deletion
chrIV	18317130	18317249	mfCnv978	ENSGACG00000018760	noncoding	no	freshGreaterThanMarine	deletion
chrIV	18319345	18319429	mfCnv979	ENSGACG00000018760	noncoding	no	freshGreaterThanMarine	deletion
chrIV	18336158	18336218	mfCnv980	ENSGACG00000018760	noncoding	no	freshGreaterThanMarine	deletion
chrIV	18396556	18396635	mfCnv981	ENSGACG00000018760	noncoding	no	freshGreaterThanMarine	deletion
chrIV	18405236	18405359	mfCnv982	ENSGACG00000018760	noncoding	no	freshGreaterThanMarine	deletion
chrIV	18435625	18435689	mfCnv983	ENSGACG00000018763	noncoding	no	freshGreaterThanMarine	deletion
chrIV	18443353	18443415	mfCnv984	ENSGACG00000018763	noncoding	no	freshGreaterThanMarine	deletion
chrIV	18449829	18449900	mfCnv985	ENSGACG00000018763	noncoding	no	freshGreaterThanMarine	deletion
chrIV	18499660	18499773	mfCnv986	ENSGACG00000018763	noncoding	no	freshGreaterThanMarine	deletion
chrIV	18516712	18516984	mfCnv987	ENSGACG00000018763	noncoding	no	freshGreaterThanMarine	deletion
chrIV	18528711	18528786	mfCnv988	ENSGACG00000018763	noncoding	no	freshGreaterThanMarine	deletion
chrIV	18741403	18741453	mfCnv989	ENSGACG00000018789	noncoding	no	freshGreaterThanMarine	deletion
chrIV	18749367	18749431	mfCnv990	ENSGACG00000018789	noncoding	no	freshGreaterThanMarine	deletion
chrIV	18820857	18820904	mfCnv991	ENSGACG00000018803	noncoding	no	freshGreaterThanMarine	deletion
chrIV	18852391	18852656	mfCnv992	ENSGACG00000018803	noncoding	no	freshGreaterThanMarine	deletion
chrIV	18853340	18853508	mfCnv993	ENSGACG00000018803	noncoding	no	freshGreaterThanMarine	deletion
chrIV	19156396	19156493	mfCnv994	ENSGACG00000018829	noncoding	no	freshGreaterThanMarine	deletion
chrIV	19247356	19247704	mfCnv995	ENSGACG00000018829	noncoding	no	freshGreaterThanMarine	deletion
chrIV	19258210	19258268	mfCnv996	ENSGACG00000018829	noncoding	no	freshGreaterThanMarine	deletion
chrIV	19258639	19258761	mfCnv997	ENSGACG00000018829	noncoding	no	freshGreaterThanMarine	deletion
chrIV	19475415	19475556	mfCnv998	ENSGACG00000018847	noncoding	yes	freshGreaterThanMarine	deletion
chrIV	19661427	19661479	mfCnv999	ENSGACG00000018882	noncoding	no	freshGreaterThanMarine	deletion
chrIV	19686709	19686827	mfCnv1000	ENSGACG00000018882	noncoding	no	freshGreaterThanMarine	deletion
chrIV	19709406	19709636	mfCnv1001	ENSGACG00000018882	noncoding	no	freshGreaterThanMarine	deletion
chrIV	19710450	19710640	mfCnv1002	ENSGACG00000018882	noncoding	no	freshGreaterThanMarine	deletion
chrIV	19710823	19711112	mfCnv1003	ENSGACG00000018882	noncoding	no	freshGreaterThanMarine	deletion
chrIV	19713083	19713146	mfCnv1004	ENSGACG00000018882	noncoding	no	freshGreaterThanMarine	deletion
chrIV	19720262	19720335	mfCnv1005	ENSGACG00000018882	noncoding	no	freshGreaterThanMarine	deletion
chrIV	19738351	19738416	mfCnv1006	ENSGACG00000018882	noncoding	no	freshGreaterThanMarine	deletion
chrIV	19768127	19768187	mfCnv1007	ENSGACG00000018882	noncoding	no	freshGreaterThanMarine	deletion
chrIV	19769689	19769763	mfCnv1008	ENSGACG00000018882	noncoding	no	freshGreaterThanMarine	deletion
chrIV	19778156	19778235	mfCnv1009	ENSGACG00000018882	noncoding	no	freshGreaterThanMarine	deletion
chrIV	19797601	19797712	mfCnv1010	ENSGACG00000018882	noncoding	no	freshGreaterThanMarine	deletion
chrIV	19808005	19808169	mfCnv1011	ENSGACG00000018887	noncoding	no	freshGreaterThanMarine	deletion
chrIV	19813374	19813457	mfCnv1012	ENSGACG00000018891	noncoding	no	freshGreaterThanMarine	deletion
chrIV	19815012	19815069	mfCnv1013	ENSGACG00000018891	noncoding	no	freshGreaterThanMarine	deletion
chrIV	19821678	19821747	mfCnv1014	ENSGACG00000018891	noncoding	no	freshGreaterThanMarine	deletion
chrIV	19833021	19833190	mfCnv1015	ENSGACG00000018910	noncoding	no	freshGreaterThanMarine	deletion
chrIV	19836524	19836680	mfCnv1016	ENSGACG00000018910	noncoding	no	freshGreaterThanMarine	deletion
chrIV	19838820	19838885	mfCnv1017	ENSGACG00000018910	noncoding	no	freshGreaterThanMarine	deletion
chrIV	19841539	19841675	mfCnv1018	ENSGACG00000018910	noncoding	no	freshGreaterThanMarine	deletion
chrIV	19845962	19846786	mfCnv1019	ENSGACG00000018910	noncoding	no	freshGreaterThanMarine	deletion
chrIV	19847228	19847363	mfCnv1020	ENSGACG00000018910	noncoding	no	freshGreaterThanMarine	deletion
chrIV	19847825	19848258	mfCnv1021	ENSGACG00000018910	noncoding	no	freshGreaterThanMarine	deletion
chrIV	19853462	19853542	mfCnv1022	ENSGACG00000018910	noncoding	no	freshGreaterThanMarine	deletion
chrIV	19858359	19858475	mfCnv1023	ENSGACG00000018910	noncoding	no	freshGreaterThanMarine	deletion
chrIV	19870202	19870252	mfCnv1024	ENSGACG00000018911	noncoding	no	freshGreaterThanMarine	deletion
chrIV	19888185	19888260	mfCnv1025	ENSGACG00000018911	noncoding	no	freshGreaterThanMarine	deletion
chrIV	19906658	19906748	mfCnv1026	ENSGACG00000018911	noncoding	no	freshGreaterThanMarine	deletion
chrIV	19921541	19921591	mfCnv1027	ENSGACG00000018911	noncoding	no	freshGreaterThanMarine	deletion
chrIV	19922990	19923158	mfCnv1028	ENSGACG00000018911	noncoding	no	freshGreaterThanMarine	deletion
chrIV	19923526	19923857	mfCnv1029	ENSGACG00000018911	noncoding	no	freshGreaterThanMarine	deletion
chrIV	19925538	19925653	mfCnv1030	ENSGACG00000018911	noncoding	no	freshGreaterThanMarine	deletion
chrIV	19930414	19930502	mfCnv1031	ENSGACG00000018911	noncoding	no	freshGreaterThanMarine	deletion
chrIV	19930661	19930708	mfCnv1032	ENSGACG00000018911	noncoding	no	freshGreaterThanMarine	deletion
chrIV	19932606	19932708	mfCnv1033	ENSGACG00000018911	noncoding	no	freshGreaterThanMarine	deletion
chrIV	19932937	19933541	mfCnv1034	ENSGACG00000018911	noncoding	no	freshGreaterThanMarine	deletion
chrIV	19942237	19942331	mfCnv1035	ENSGACG00000018911	noncoding	no	freshGreaterThanMarine	deletion
chrIV	19943540	19943601	mfCnv1036	ENSGACG00000018911	noncoding	no	freshGreaterThanMarine	deletion
chrIV	19944077	19944498	mfCnv1037	ENSGACG00000018911	noncoding	no	freshGreaterThanMarine	deletion
chrIV	19946555	19946659	mfCnv1038	ENSGACG00000018911	noncoding	no	freshGreaterThanMarine	deletion
chrIV	19946979	19947080	mfCnv1039	ENSGACG00000018911	noncoding	no	freshGreaterThanMarine	deletion
chrIV	19947299	19947400	mfCnv1040	ENSGACG00000018911	noncoding	no	freshGreaterThanMarine	deletion
chrIV	19948527	19948582	mfCnv1041	ENSGACG00000018911	ENSGACG00000018964	no	freshGreaterThanMarine	deletion
chrIV	19955302	19955531	mfCnv1042	ENSGACG00000018911	noncoding	no	freshGreaterThanMarine	deletion
chrIV	19956508	19956578	mfCnv1043	ENSGACG00000018911	noncoding	no	freshGreaterThanMarine	deletion
chrIV	19957298	19957404	mfCnv1044	ENSGACG00000018911	noncoding	no	freshGreaterThanMarine	deletion
chrIV	19957637	19957684	mfCnv1045	ENSGACG00000018911	noncoding	no	freshGreaterThanMarine	deletion
chrIV	19958868	19958917	mfCnv1046	ENSGACG00000018911	noncoding	no	freshGreaterThanMarine	deletion
chrIV	19959089	19959147	mfCnv1047	ENSGACG00000018911	noncoding	no	freshGreaterThanMarine	deletion
chrIV	19960340	19960525	mfCnv1048	ENSGACG00000018911	noncoding	yes	freshGreaterThanMarine	deletion
chrIV	19970255	19970325	mfCnv1049	ENSGACG00000018911	noncoding	no	freshGreaterThanMarine	deletion
chrIV	19970649	19970852	mfCnv1050	ENSGACG00000018911	noncoding	no	freshGreaterThanMarine	deletion
chrIV	19981786	19981840	mfCnv1051	ENSGACG00000018911	noncoding	no	freshGreaterThanMarine	deletion
chrIV	19982075	19982203	mfCnv1052	ENSGACG00000018911	noncoding	no	freshGreaterThanMarine	deletion
chrIV	19984306	19984364	mfCnv1053	ENSGACG00000018911	noncoding	yes	freshGreaterThanMarine	deletion
chrIV	20007672	20007734	mfCnv1054	ENSGACG00000018911	noncoding	no	freshGreaterThanMarine	deletion
chrIV	20027420	20027470	mfCnv1055	ENSGACG00000018911	noncoding	no	freshGreaterThanMarine	deletion
chrIV	20032687	20032745	mfCnv1056	ENSGACG00000018911	noncoding	no	freshGreaterThanMarine	deletion
chrIV	20033649	20033704	mfCnv1057	ENSGACG00000018911	noncoding	yes	freshGreaterThanMarine	deletion
chrIV	20044348	20044428	mfCnv1058	ENSGACG00000018911	noncoding	no	freshGreaterThanMarine	deletion
chrIV	20068279	20068343	mfCnv1059	ENSGACG00000018911	noncoding	no	freshGreaterThanMarine	deletion
chrIV	20079629	20079688	mfCnv1060	ENSGACG00000018911	noncoding	no	freshGreaterThanMarine	deletion
chrIV	20091436	20092129	mfCnv1061	ENSGACG00000018917	noncoding	no	marineGreaterThanFresh	deletion
chrIV	20138768	20138820	mfCnv1062	ENSGACG00000018917	noncoding	no	freshGreaterThanMarine	deletion
chrIV	20158653	20158756	mfCnv1063	ENSGACG00000018917	noncoding	no	freshGreaterThanMarine	deletion
chrIV	20160865	20160927	mfCnv1064	ENSGACG00000018917	noncoding	yes	freshGreaterThanMarine	deletion
chrIV	20164526	20164599	mfCnv1065	ENSGACG00000018917	noncoding	no	freshGreaterThanMarine	deletion
chrIV	20186017	20186090	mfCnv1066	ENSGACG00000018923	noncoding	no	freshGreaterThanMarine	deletion
chrIV	20196439	20196516	mfCnv1067	ENSGACG00000018923	noncoding	no	freshGreaterThanMarine	deletion
chrIV	20196641	20196714	mfCnv1068	ENSGACG00000018923	noncoding	no	freshGreaterThanMarine	deletion
chrIV	20199092	20199381	mfCnv1069	ENSGACG00000018923	noncoding	no	freshGreaterThanMarine	deletion
chrIV	20202872	20202938	mfCnv1070	ENSGACG00000018923	noncoding	no	freshGreaterThanMarine	deletion
chrIV	20208828	20208913	mfCnv1071	ENSGACG00000018923	noncoding	no	freshGreaterThanMarine	deletion
chrIV	20212095	20212138	mfCnv1072	ENSGACG00000018923	noncoding	no	freshGreaterThanMarine	deletion
chrIV	20262211	20262331	mfCnv1073	ENSGACG00000018923	noncoding	no	marineGreaterThanFresh	both
chrIV	20280766	20280819	mfCnv1074	ENSGACG00000018923	noncoding	no	freshGreaterThanMarine	deletion
chrIV	20305808	20305862	mfCnv1075	ENSGACG00000018923	noncoding	no	freshGreaterThanMarine	deletion
chrIV	20470762	20470932	mfCnv1076	ENSGACG00000018929	noncoding	no	marineGreaterThanFresh	deletion
chrIV	20530499	20530549	mfCnv1077	ENSGACG00000018929	noncoding	no	freshGreaterThanMarine	deletion
chrIV	20531893	20531964	mfCnv1078	ENSGACG00000018929	noncoding	no	freshGreaterThanMarine	deletion
chrIV	20538658	20538704	mfCnv1079	ENSGACG00000018929	noncoding	no	freshGreaterThanMarine	deletion
chrIV	20626130	20626190	mfCnv1080	ENSGACG00000018929	noncoding	no	freshGreaterThanMarine	deletion
chrIV	20630683	20630735	mfCnv1081	ENSGACG00000018930	noncoding	no	freshGreaterThanMarine	deletion
chrIV	20634167	20634236	mfCnv1082	ENSGACG00000018930	noncoding	no	freshGreaterThanMarine	deletion
chrIV	20634557	20634605	mfCnv1083	ENSGACG00000018930	noncoding	no	freshGreaterThanMarine	deletion
chrIV	20640132	20640187	mfCnv1084	ENSGACG00000018930	noncoding	no	freshGreaterThanMarine	deletion
chrIV	20661781	20661927	mfCnv1085	ENSGACG00000018930	noncoding	no	freshGreaterThanMarine	deletion
chrIV	20667768	20667834	mfCnv1086	ENSGACG00000018930	noncoding	no	freshGreaterThanMarine	deletion
chrIV	20696805	20696857	mfCnv1087	ENSGACG00000018942	noncoding	no	freshGreaterThanMarine	deletion
chrIV	20698189	20698238	mfCnv1088	ENSGACG00000018942	noncoding	no	freshGreaterThanMarine	deletion
chrIV	20704984	20705049	mfCnv1089	ENSGACG00000018942	noncoding	no	freshGreaterThanMarine	deletion
chrIV	20824420	20824523	mfCnv1090	ENSGACG00000018958	noncoding	no	freshGreaterThanMarine	deletion
chrIV	20859111	20859171	mfCnv1091	ENSGACG00000018958	noncoding	no	freshGreaterThanMarine	deletion
chrIV	20861332	20861411	mfCnv1092	ENSGACG00000018959	noncoding	no	freshGreaterThanMarine	deletion
chrIV	20897057	20897202	mfCnv1093	ENSGACG00000018959	noncoding	no	freshGreaterThanMarine	deletion
chrIV	20925199	20925247	mfCnv1094	ENSGACG00000018964	noncoding	no	freshGreaterThanMarine	deletion
chrIV	20925285	20925416	mfCnv1095	ENSGACG00000018964	ENSGACG00000019033	no	freshGreaterThanMarine	deletion
chrIV	20927477	20927541	mfCnv1096	ENSGACG00000018964	noncoding	no	freshGreaterThanMarine	deletion
chrIV	20929314	20929408	mfCnv1097	ENSGACG00000018964	noncoding	no	freshGreaterThanMarine	deletion
chrIV	20966162	20966379	mfCnv1098	ENSGACG00000018967	noncoding	no	freshGreaterThanMarine	deletion
chrIV	20995894	20996151	mfCnv1099	ENSGACG00000018969	noncoding	no	freshGreaterThanMarine	deletion
chrIV	20996537	20996606	mfCnv1100	ENSGACG00000018969	noncoding	no	freshGreaterThanMarine	deletion
chrIV	20999327	20999389	mfCnv1101	ENSGACG00000018969	noncoding	no	freshGreaterThanMarine	deletion
chrIV	21002757	21002893	mfCnv1102	ENSGACG00000018981	noncoding	no	freshGreaterThanMarine	deletion
chrIV	21007639	21007706	mfCnv1103	ENSGACG00000018983	noncoding	no	freshGreaterThanMarine	deletion
chrIV	21017113	21017406	mfCnv1104	ENSGACG00000018983	noncoding	no	freshGreaterThanMarine	deletion
chrIV	21018420	21018929	mfCnv1105	ENSGACG00000018983	noncoding	no	freshGreaterThanMarine	deletion
chrIV	21019940	21020309	mfCnv1106	ENSGACG00000018996	ENSGACG00000019037	yes	freshGreaterThanMarine	deletion
chrIV	21038257	21038344	mfCnv1107	ENSGACG00000018997	noncoding	no	freshGreaterThanMarine	deletion
chrIV	21040108	21040376	mfCnv1108	ENSGACG00000018997	noncoding	no	freshGreaterThanMarine	deletion
chrIV	21045369	21045505	mfCnv1109	ENSGACG00000018997	noncoding	no	freshGreaterThanMarine	deletion
chrIV	21045627	21045794	mfCnv1110	ENSGACG00000018997	noncoding	no	freshGreaterThanMarine	deletion
chrIV	21045943	21046009	mfCnv1111	ENSGACG00000018997	noncoding	no	freshGreaterThanMarine	deletion
chrIV	21060607	21060697	mfCnv1112	ENSGACG00000018997	noncoding	no	freshGreaterThanMarine	deletion
chrIV	21063204	21063252	mfCnv1113	ENSGACG00000018998	noncoding	no	freshGreaterThanMarine	deletion
chrIV	21064600	21064649	mfCnv1114	ENSGACG00000019001	noncoding	no	freshGreaterThanMarine	deletion
chrIV	21069849	21070030	mfCnv1115	ENSGACG00000019001	noncoding	no	freshGreaterThanMarine	deletion
chrIV	21070112	21070484	mfCnv1116	ENSGACG00000019001	noncoding	no	freshGreaterThanMarine	deletion
chrIV	21078218	21078569	mfCnv1117	ENSGACG00000019001	noncoding	no	freshGreaterThanMarine	deletion
chrIV	21078678	21078884	mfCnv1118	ENSGACG00000019001	noncoding	no	freshGreaterThanMarine	deletion
chrIV	21079088	21079768	mfCnv1119	ENSGACG00000019001	noncoding	no	freshGreaterThanMarine	deletion
chrIV	21080118	21080302	mfCnv1120	ENSGACG00000019001	noncoding	no	freshGreaterThanMarine	deletion
chrIV	21084591	21084861	mfCnv1121	ENSGACG00000019001	noncoding	no	freshGreaterThanMarine	deletion
chrIV	21086633	21086736	mfCnv1122	ENSGACG00000019001	noncoding	no	freshGreaterThanMarine	deletion
chrIV	21090775	21091092	mfCnv1123	ENSGACG00000019001	noncoding	no	freshGreaterThanMarine	deletion
chrIV	21091349	21091412	mfCnv1124	ENSGACG00000019001	noncoding	no	freshGreaterThanMarine	deletion
chrIV	21094191	21094288	mfCnv1125	ENSGACG00000019001	noncoding	no	freshGreaterThanMarine	deletion
chrIV	21094667	21095852	mfCnv1126	ENSGACG00000019001	noncoding	no	freshGreaterThanMarine	deletion
chrIV	21096327	21096370	mfCnv1127	ENSGACG00000019001	noncoding	no	freshGreaterThanMarine	deletion
chrIV	21097924	21097983	mfCnv1128	ENSGACG00000019001	noncoding	no	freshGreaterThanMarine	deletion
chrIV	21102117	21102282	mfCnv1129	ENSGACG00000019001	noncoding	no	freshGreaterThanMarine	deletion
chrIV	21103147	21103225	mfCnv1130	ENSGACG00000019001	noncoding	no	freshGreaterThanMarine	deletion
chrIV	21105380	21105482	mfCnv1131	ENSGACG00000019001	noncoding	no	freshGreaterThanMarine	deletion
chrIV	21112931	21113030	mfCnv1132	ENSGACG00000019001	noncoding	no	freshGreaterThanMarine	deletion
chrIV	21115054	21115130	mfCnv1133	ENSGACG00000019001	noncoding	no	freshGreaterThanMarine	deletion
chrIV	21118735	21118784	mfCnv1134	ENSGACG00000019001	noncoding	no	freshGreaterThanMarine	deletion
chrIV	21123166	21123227	mfCnv1135	ENSGACG00000019001	noncoding	no	freshGreaterThanMarine	deletion
chrIV	21132663	21132865	mfCnv1136	ENSGACG00000019001	noncoding	no	freshGreaterThanMarine	deletion
chrIV	21134800	21135040	mfCnv1137	ENSGACG00000019001	noncoding	no	freshGreaterThanMarine	deletion
chrIV	21137934	21138164	mfCnv1138	ENSGACG00000019001	ENSGACG00000019061	no	freshGreaterThanMarine	deletion
chrIV	21139729	21139788	mfCnv1139	ENSGACG00000019001	noncoding	no	freshGreaterThanMarine	deletion
chrIV	21140181	21140291	mfCnv1140	ENSGACG00000019001	noncoding	yes	freshGreaterThanMarine	deletion
chrIV	21140432	21140603	mfCnv1141	ENSGACG00000019001	ENSGACG00000019061	yes	freshGreaterThanMarine	deletion
chrIV	21142576	21142692	mfCnv1142	ENSGACG00000019001	noncoding	yes	freshGreaterThanMarine	deletion
chrIV	21156423	21156551	mfCnv1143	ENSGACG00000019001	noncoding	no	freshGreaterThanMarine	deletion
chrIV	21157831	21158058	mfCnv1144	ENSGACG00000019001	noncoding	no	freshGreaterThanMarine	deletion
chrIV	21159561	21159661	mfCnv1145	ENSGACG00000019001	noncoding	no	freshGreaterThanMarine	deletion
chrIV	21165475	21165551	mfCnv1146	ENSGACG00000019001	noncoding	no	freshGreaterThanMarine	deletion
chrIV	21167299	21167418	mfCnv1147	ENSGACG00000019001	ENSGACG00000019063	no	freshGreaterThanMarine	deletion
chrIV	21170830	21170931	mfCnv1148	ENSGACG00000019001	ENSGACG00000019063	no	freshGreaterThanMarine	deletion
chrIV	21173338	21173576	mfCnv1149	ENSGACG00000019001	ENSGACG00000019063	no	freshGreaterThanMarine	deletion
chrIV	21174405	21174523	mfCnv1150	ENSGACG00000019001	noncoding	no	freshGreaterThanMarine	deletion
chrIV	21175699	21175752	mfCnv1151	ENSGACG00000019001	noncoding	no	freshGreaterThanMarine	deletion
chrIV	21176000	21176290	mfCnv1152	ENSGACG00000019001	noncoding	no	freshGreaterThanMarine	deletion
chrIV	21179168	21179313	mfCnv1153	ENSGACG00000019001	noncoding	no	freshGreaterThanMarine	deletion
chrIV	21179791	21179845	mfCnv1154	ENSGACG00000019005	noncoding	no	freshGreaterThanMarine	deletion
chrIV	21183311	21183538	mfCnv1155	ENSGACG00000019005	noncoding	no	freshGreaterThanMarine	deletion
chrIV	21183787	21183830	mfCnv1156	ENSGACG00000019005	noncoding	no	freshGreaterThanMarine	deletion
chrIV	21184583	21185033	mfCnv1157	ENSGACG00000019005	noncoding	no	freshGreaterThanMarine	deletion
chrIV	21188383	21188473	mfCnv1158	ENSGACG00000019005	noncoding	no	freshGreaterThanMarine	deletion
chrIV	21201930	21201980	mfCnv1159	ENSGACG00000019005	noncoding	no	freshGreaterThanMarine	deletion
chrIV	21202252	21202315	mfCnv1160	ENSGACG00000019005	noncoding	no	freshGreaterThanMarine	deletion
chrIV	21203165	21203279	mfCnv1161	ENSGACG00000019005	noncoding	no	freshGreaterThanMarine	both
chrIV	21203415	21203558	mfCnv1162	ENSGACG00000019005	noncoding	no	freshGreaterThanMarine	both
chrIV	21210914	21210987	mfCnv1163	ENSGACG00000019008	noncoding	no	freshGreaterThanMarine	deletion
chrIV	21224740	21224785	mfCnv1164	ENSGACG00000019014	noncoding	no	freshGreaterThanMarine	deletion
chrIV	21229618	21229752	mfCnv1165	ENSGACG00000019014	noncoding	no	freshGreaterThanMarine	deletion
chrIV	21230879	21230946	mfCnv1166	ENSGACG00000019014	noncoding	no	freshGreaterThanMarine	deletion
chrIV	21256122	21256185	mfCnv1167	ENSGACG00000019014	noncoding	no	freshGreaterThanMarine	deletion
chrIV	21267902	21267970	mfCnv1168	ENSGACG00000019014	noncoding	no	freshGreaterThanMarine	deletion
chrIV	21511186	21511250	mfCnv1169	ENSGACG00000019014	noncoding	no	freshGreaterThanMarine	deletion
chrIV	21596725	21596786	mfCnv1170	ENSGACG00000019014	noncoding	no	freshGreaterThanMarine	deletion
chrIV	21624082	21624180	mfCnv1171	ENSGACG00000019014	noncoding	no	freshGreaterThanMarine	deletion
chrIV	21632829	21632911	mfCnv1172	ENSGACG00000019014	ENSGACG00000019115	yes	freshGreaterThanMarine	deletion
chrIV	21646762	21646846	mfCnv1173	ENSGACG00000019016	noncoding	yes	freshGreaterThanMarine	deletion
chrIV	21649359	21649413	mfCnv1174	ENSGACG00000019016	noncoding	no	freshGreaterThanMarine	deletion
chrIV	21657738	21657843	mfCnv1175	ENSGACG00000019020	noncoding	no	freshGreaterThanMarine	deletion
chrIV	21661927	21661983	mfCnv1176	ENSGACG00000019020	noncoding	no	freshGreaterThanMarine	deletion
chrIV	21663250	21663318	mfCnv1177	ENSGACG00000019020	noncoding	no	freshGreaterThanMarine	deletion
chrIV	21670061	21670138	mfCnv1178	ENSGACG00000019020	noncoding	no	freshGreaterThanMarine	deletion
chrIV	21676712	21676783	mfCnv1179	ENSGACG00000019020	noncoding	no	freshGreaterThanMarine	deletion
chrIV	21679977	21680022	mfCnv1180	ENSGACG00000019020	noncoding	no	freshGreaterThanMarine	deletion
chrIV	21686366	21686419	mfCnv1181	ENSGACG00000019020	noncoding	no	freshGreaterThanMarine	deletion
chrIV	21706035	21706086	mfCnv1182	ENSGACG00000019020	noncoding	no	freshGreaterThanMarine	deletion
chrIV	21716551	21716638	mfCnv1183	ENSGACG00000019020	noncoding	no	freshGreaterThanMarine	deletion
chrIV	21717633	21717690	mfCnv1184	ENSGACG00000019020	noncoding	no	freshGreaterThanMarine	deletion
chrIV	21719010	21719084	mfCnv1185	ENSGACG00000019020	noncoding	no	freshGreaterThanMarine	deletion
chrIV	21725785	21726172	mfCnv1186	ENSGACG00000019020	noncoding	no	freshGreaterThanMarine	deletion
chrIV	21729091	21729173	mfCnv1187	ENSGACG00000019020	noncoding	no	freshGreaterThanMarine	deletion
chrIV	21755064	21755233	mfCnv1188	ENSGACG00000019020	noncoding	no	freshGreaterThanMarine	deletion
chrIV	21756047	21756110	mfCnv1189	ENSGACG00000019020	noncoding	no	freshGreaterThanMarine	deletion
chrIV	21758274	21758330	mfCnv1190	ENSGACG00000019020	noncoding	no	freshGreaterThanMarine	deletion
chrIV	21758957	21759086	mfCnv1191	ENSGACG00000019020	noncoding	no	freshGreaterThanMarine	deletion
chrIV	22126935	22127768	mfCnv1192	ENSGACG00000019066	noncoding	no	marineGreaterThanFresh	both
chrIV	22129029	22129406	mfCnv1193	ENSGACG00000019066	noncoding	no	marineGreaterThanFresh	deletion
chrIV	22162400	22163848	mfCnv1194	ENSGACG00000019066	noncoding	no	marineGreaterThanFresh	deletion
chrIV	22194301	22194451	mfCnv1195	ENSGACG00000019066	noncoding	no	marineGreaterThanFresh	both
chrIV	22279860	22279895	mfCnv1196	ENSGACG00000019077	noncoding	no	marineGreaterThanFresh	deletion
chrIV	22582486	22582529	mfCnv1197	ENSGACG00000019108	noncoding	no	freshGreaterThanMarine	deletion
chrIV	22615069	22615129	mfCnv1198	ENSGACG00000019116	noncoding	no	freshGreaterThanMarine	deletion
chrIV	22660883	22661006	mfCnv1199	ENSGACG00000019116	noncoding	no	freshGreaterThanMarine	deletion
chrIV	22785570	22786282	mfCnv1200	ENSGACG00000019121	noncoding	no	freshGreaterThanMarine	deletion
chrIV	22826398	22826795	mfCnv1201	ENSGACG00000019129	noncoding	no	freshGreaterThanMarine	deletion
chrIV	22826901	22827224	mfCnv1202	ENSGACG00000019129	noncoding	no	freshGreaterThanMarine	deletion
chrIV	22827360	22827850	mfCnv1203	ENSGACG00000019129	noncoding	no	freshGreaterThanMarine	deletion
chrIV	22828019	22828542	mfCnv1204	ENSGACG00000019129	noncoding	no	freshGreaterThanMarine	deletion
chrIV	22828809	22829057	mfCnv1205	ENSGACG00000019129	noncoding	yes	freshGreaterThanMarine	deletion
chrIV	23642172	23644109	mfCnv1206	ENSGACG00000019218	noncoding	no	marineGreaterThanFresh	duplication
chrIV	23766821	23767512	mfCnv1207	ENSGACG00000019221	noncoding	no	marineGreaterThanFresh	deletion
chrIV	23785717	23786150	mfCnv1208	ENSGACG00000019221	noncoding	no	marineGreaterThanFresh	deletion
chrIV	23798605	23799537	mfCnv1209	ENSGACG00000019221	noncoding	no	marineGreaterThanFresh	deletion
chrIV	23801568	23801712	mfCnv1210	ENSGACG00000019221	noncoding	no	freshGreaterThanMarine	deletion
chrIV	23807299	23807671	mfCnv1211	ENSGACG00000019221	ENSGACG00000019282	no	freshGreaterThanMarine	deletion
chrIV	23836927	23837010	mfCnv1212	ENSGACG00000019227	noncoding	no	freshGreaterThanMarine	deletion
chrIV	23884404	23884505	mfCnv1213	ENSGACG00000019227	noncoding	no	freshGreaterThanMarine	deletion
chrIV	23892739	23892811	mfCnv1214	ENSGACG00000019227	noncoding	no	freshGreaterThanMarine	deletion
chrIV	23897898	23897944	mfCnv1215	ENSGACG00000019227	noncoding	no	freshGreaterThanMarine	deletion
chrIV	23898156	23898213	mfCnv1216	ENSGACG00000019227	noncoding	no	freshGreaterThanMarine	deletion
chrIV	23898463	23898549	mfCnv1217	ENSGACG00000019227	noncoding	no	freshGreaterThanMarine	deletion
chrIV	23899281	23900037	mfCnv1218	ENSGACG00000019227	noncoding	no	freshGreaterThanMarine	deletion
chrIV	23912865	23912918	mfCnv1219	ENSGACG00000019227	noncoding	no	freshGreaterThanMarine	deletion
chrIV	23913232	23913279	mfCnv1220	ENSGACG00000019227	noncoding	no	freshGreaterThanMarine	both
chrIV	23913362	23913411	mfCnv1221	ENSGACG00000019227	noncoding	no	freshGreaterThanMarine	deletion
chrIV	23915672	23915836	mfCnv1222	ENSGACG00000019230	noncoding	no	freshGreaterThanMarine	deletion
chrIV	23917600	23917638	mfCnv1223	ENSGACG00000019230	noncoding	no	freshGreaterThanMarine	deletion
chrIV	23929924	23931153	mfCnv1224	ENSGACG00000019230	noncoding	no	freshGreaterThanMarine	deletion
chrIV	23934961	23935647	mfCnv1225	ENSGACG00000019230	noncoding	no	freshGreaterThanMarine	deletion
chrIV	23959518	23959983	mfCnv1226	ENSGACG00000019230	noncoding	no	freshGreaterThanMarine	deletion
chrIV	23966253	23966924	mfCnv1227	ENSGACG00000019236	noncoding	no	freshGreaterThanMarine	deletion
chrIV	23973601	23973935	mfCnv1228	ENSGACG00000019236	noncoding	no	freshGreaterThanMarine	deletion
chrIV	23974133	23974496	mfCnv1229	ENSGACG00000019236	noncoding	no	freshGreaterThanMarine	deletion
chrIV	23975160	23975245	mfCnv1230	ENSGACG00000019236	noncoding	no	freshGreaterThanMarine	deletion
chrIV	23975965	23976038	mfCnv1231	ENSGACG00000019236	noncoding	no	freshGreaterThanMarine	deletion
chrIV	23976861	23976991	mfCnv1232	ENSGACG00000019236	noncoding	no	freshGreaterThanMarine	deletion
chrIV	23977102	23977476	mfCnv1233	ENSGACG00000019236	noncoding	no	freshGreaterThanMarine	deletion
chrIV	23992566	23992660	mfCnv1234	ENSGACG00000019236	noncoding	no	freshGreaterThanMarine	deletion
chrIV	23993700	23993754	mfCnv1235	ENSGACG00000019236	noncoding	no	freshGreaterThanMarine	deletion
chrIV	24011558	24011864	mfCnv1236	ENSGACG00000019238	noncoding	no	freshGreaterThanMarine	deletion
chrIV	24011864	24012020	mfCnv1237	ENSGACG00000019238	noncoding	no	freshGreaterThanMarine	deletion
chrIV	24012083	24013815	mfCnv1238	ENSGACG00000019238	noncoding	no	freshGreaterThanMarine	deletion
chrIV	24013876	24014057	mfCnv1239	ENSGACG00000019238	noncoding	no	freshGreaterThanMarine	deletion
chrIV	24015011	24015159	mfCnv1240	ENSGACG00000019238	noncoding	no	freshGreaterThanMarine	deletion
chrIV	24040336	24041399	mfCnv1241	ENSGACG00000019238	noncoding	no	marineGreaterThanFresh	deletion
chrIV	24126310	24126940	mfCnv1242	ENSGACG00000019242	noncoding	no	marineGreaterThanFresh	deletion
chrIV	24211651	24212053	mfCnv1243	ENSGACG00000019253	noncoding	no	freshGreaterThanMarine	deletion
chrIV	24217841	24217926	mfCnv1244	ENSGACG00000019253	noncoding	no	freshGreaterThanMarine	deletion
chrIV	24225488	24225766	mfCnv1245	ENSGACG00000019253	noncoding	no	freshGreaterThanMarine	deletion
chrIV	24237744	24238252	mfCnv1246	ENSGACG00000019253	noncoding	no	freshGreaterThanMarine	deletion
chrIV	24238567	24238657	mfCnv1247	ENSGACG00000019253	noncoding	no	freshGreaterThanMarine	deletion
chrIV	24245614	24245661	mfCnv1248	ENSGACG00000019253	noncoding	no	freshGreaterThanMarine	deletion
chrIV	24249823	24250102	mfCnv1249	ENSGACG00000019253	noncoding	no	freshGreaterThanMarine	deletion
chrIV	24254915	24255200	mfCnv1250	ENSGACG00000019257	noncoding	no	freshGreaterThanMarine	deletion
chrIV	24256698	24256799	mfCnv1251	ENSGACG00000019257	noncoding	no	freshGreaterThanMarine	deletion
chrIV	24267522	24267641	mfCnv1252	ENSGACG00000019257	noncoding	no	freshGreaterThanMarine	deletion
chrIV	24267800	24267859	mfCnv1253	ENSGACG00000019257	noncoding	no	freshGreaterThanMarine	deletion
chrIV	24271585	24271672	mfCnv1254	ENSGACG00000019257	noncoding	no	freshGreaterThanMarine	deletion
chrIV	24273285	24273332	mfCnv1255	ENSGACG00000019257	noncoding	no	freshGreaterThanMarine	deletion
chrIV	24285234	24285482	mfCnv1256	ENSGACG00000019257	noncoding	no	freshGreaterThanMarine	deletion
chrIV	24294512	24294600	mfCnv1257	ENSGACG00000019257	noncoding	no	freshGreaterThanMarine	deletion
chrIV	24295820	24295951	mfCnv1258	ENSGACG00000019257	noncoding	no	freshGreaterThanMarine	deletion
chrIV	24312308	24312420	mfCnv1259	ENSGACG00000019257	noncoding	no	freshGreaterThanMarine	deletion
chrIV	24331931	24332031	mfCnv1260	ENSGACG00000019257	noncoding	no	freshGreaterThanMarine	deletion
chrIV	24339445	24339518	mfCnv1261	ENSGACG00000019257	noncoding	no	freshGreaterThanMarine	deletion
chrIV	24342512	24342567	mfCnv1262	ENSGACG00000019257	noncoding	no	freshGreaterThanMarine	deletion
chrIV	24364044	24364200	mfCnv1263	ENSGACG00000019259	noncoding	no	freshGreaterThanMarine	deletion
chrIV	24378843	24378982	mfCnv1264	ENSGACG00000019259	noncoding	no	freshGreaterThanMarine	deletion
chrIV	24380252	24380350	mfCnv1265	ENSGACG00000019259	noncoding	no	freshGreaterThanMarine	deletion
chrIV	24381365	24381447	mfCnv1266	ENSGACG00000019259	noncoding	no	freshGreaterThanMarine	deletion
chrIV	24382140	24382231	mfCnv1267	ENSGACG00000019259	noncoding	no	freshGreaterThanMarine	deletion
chrIV	24385174	24385215	mfCnv1268	ENSGACG00000019259	noncoding	no	freshGreaterThanMarine	deletion
chrIV	24387905	24388032	mfCnv1269	ENSGACG00000019259	noncoding	no	freshGreaterThanMarine	deletion
chrIV	24388593	24388658	mfCnv1270	ENSGACG00000019259	noncoding	no	freshGreaterThanMarine	deletion
chrIV	24389587	24389661	mfCnv1271	ENSGACG00000019259	noncoding	no	freshGreaterThanMarine	deletion
chrIV	24392428	24392489	mfCnv1272	ENSGACG00000019259	noncoding	no	freshGreaterThanMarine	deletion
chrIV	24393954	24394012	mfCnv1273	ENSGACG00000019259	noncoding	no	freshGreaterThanMarine	deletion
chrIV	24396261	24396325	mfCnv1274	ENSGACG00000019259	noncoding	no	freshGreaterThanMarine	deletion
chrIV	24396581	24396651	mfCnv1275	ENSGACG00000019259	noncoding	no	freshGreaterThanMarine	deletion
chrIV	24396899	24397050	mfCnv1276	ENSGACG00000019259	noncoding	no	freshGreaterThanMarine	deletion
chrIV	24397287	24397352	mfCnv1277	ENSGACG00000019259	noncoding	no	freshGreaterThanMarine	deletion
chrIV	24397467	24397517	mfCnv1278	ENSGACG00000019259	noncoding	no	freshGreaterThanMarine	deletion
chrIV	24398866	24398947	mfCnv1279	ENSGACG00000019259	noncoding	yes	freshGreaterThanMarine	deletion
chrIV	24399877	24400110	mfCnv1280	ENSGACG00000019259	noncoding	no	freshGreaterThanMarine	deletion
chrIV	24415954	24415999	mfCnv1281	ENSGACG00000019264	noncoding	no	freshGreaterThanMarine	deletion
chrIV	24427048	24427107	mfCnv1282	ENSGACG00000019264	noncoding	no	freshGreaterThanMarine	deletion
chrIV	24428393	24428731	mfCnv1283	ENSGACG00000019264	noncoding	no	freshGreaterThanMarine	deletion
chrIV	24428886	24428979	mfCnv1284	ENSGACG00000019264	noncoding	no	freshGreaterThanMarine	deletion
chrIV	24429834	24429886	mfCnv1285	ENSGACG00000019264	noncoding	no	freshGreaterThanMarine	deletion
chrIV	24431956	24432241	mfCnv1286	ENSGACG00000019264	noncoding	no	freshGreaterThanMarine	deletion
chrIV	24432890	24433115	mfCnv1287	ENSGACG00000019264	noncoding	no	freshGreaterThanMarine	deletion
chrIV	24433343	24433484	mfCnv1288	ENSGACG00000019264	noncoding	no	freshGreaterThanMarine	deletion
chrIV	24433517	24433567	mfCnv1289	ENSGACG00000019264	noncoding	no	freshGreaterThanMarine	deletion
chrIV	24436267	24436323	mfCnv1290	ENSGACG00000019264	noncoding	no	freshGreaterThanMarine	deletion
chrIV	24442561	24442626	mfCnv1291	ENSGACG00000019264	noncoding	no	freshGreaterThanMarine	deletion
chrIV	24443017	24443090	mfCnv1292	ENSGACG00000019264	noncoding	no	freshGreaterThanMarine	deletion
chrIV	24443652	24443717	mfCnv1293	ENSGACG00000019264	noncoding	no	freshGreaterThanMarine	deletion
chrIV	24444279	24444327	mfCnv1294	ENSGACG00000019264	noncoding	no	freshGreaterThanMarine	deletion
chrIV	24453410	24453504	mfCnv1295	ENSGACG00000019264	noncoding	no	freshGreaterThanMarine	deletion
chrIV	24457961	24458211	mfCnv1296	ENSGACG00000019264	noncoding	no	freshGreaterThanMarine	deletion
chrIV	24464555	24464725	mfCnv1297	ENSGACG00000019264	noncoding	no	freshGreaterThanMarine	deletion
chrIV	24467814	24467909	mfCnv1298	ENSGACG00000019264	noncoding	no	freshGreaterThanMarine	deletion
chrIV	24470884	24471168	mfCnv1299	ENSGACG00000019264	noncoding	no	freshGreaterThanMarine	deletion
chrIV	24477726	24477788	mfCnv1300	ENSGACG00000019264	noncoding	no	freshGreaterThanMarine	deletion
chrIV	24480270	24480909	mfCnv1301	ENSGACG00000019264	noncoding	no	freshGreaterThanMarine	deletion
chrIV	24486770	24486823	mfCnv1302	ENSGACG00000019264	noncoding	no	freshGreaterThanMarine	deletion
chrIV	24488922	24489141	mfCnv1303	ENSGACG00000019264	noncoding	no	freshGreaterThanMarine	deletion
chrIV	24498425	24498529	mfCnv1304	ENSGACG00000019264	noncoding	no	freshGreaterThanMarine	deletion
chrIV	24504578	24504628	mfCnv1305	ENSGACG00000019264	noncoding	no	freshGreaterThanMarine	deletion
chrIV	24507514	24507703	mfCnv1306	ENSGACG00000019264	noncoding	no	freshGreaterThanMarine	deletion
chrIV	24508729	24508875	mfCnv1307	ENSGACG00000019264	noncoding	no	freshGreaterThanMarine	deletion
chrIV	24511462	24511517	mfCnv1308	ENSGACG00000019264	noncoding	no	freshGreaterThanMarine	deletion
chrIV	24513361	24513420	mfCnv1309	ENSGACG00000019264	noncoding	no	freshGreaterThanMarine	deletion
chrIV	24513715	24513790	mfCnv1310	ENSGACG00000019264	noncoding	no	freshGreaterThanMarine	deletion
chrIV	24513956	24514010	mfCnv1311	ENSGACG00000019264	noncoding	no	freshGreaterThanMarine	deletion
chrIV	24516821	24516882	mfCnv1312	ENSGACG00000019264	noncoding	no	freshGreaterThanMarine	deletion
chrIV	24517273	24517566	mfCnv1313	ENSGACG00000019264	noncoding	no	freshGreaterThanMarine	deletion
chrIV	24517743	24517828	mfCnv1314	ENSGACG00000019264	noncoding	no	freshGreaterThanMarine	deletion
chrIV	24519191	24519259	mfCnv1315	ENSGACG00000019264	noncoding	no	freshGreaterThanMarine	deletion
chrIV	24525216	24525259	mfCnv1316	ENSGACG00000019264	noncoding	no	freshGreaterThanMarine	deletion
chrIV	24539686	24539753	mfCnv1317	ENSGACG00000019264	noncoding	no	freshGreaterThanMarine	deletion
chrIV	24548755	24548832	mfCnv1318	ENSGACG00000019264	noncoding	no	freshGreaterThanMarine	deletion
chrIV	24552391	24552585	mfCnv1319	ENSGACG00000019264	noncoding	no	freshGreaterThanMarine	deletion
chrIV	24572206	24572366	mfCnv1320	ENSGACG00000019264	noncoding	no	freshGreaterThanMarine	deletion
chrIV	24572509	24572569	mfCnv1321	ENSGACG00000019264	noncoding	no	freshGreaterThanMarine	deletion
chrIV	24573332	24573387	mfCnv1322	ENSGACG00000019264	noncoding	no	freshGreaterThanMarine	deletion
chrIV	24573798	24574129	mfCnv1323	ENSGACG00000019264	noncoding	no	freshGreaterThanMarine	deletion
chrIV	24581046	24581192	mfCnv1324	ENSGACG00000019264	noncoding	no	freshGreaterThanMarine	deletion
chrIV	24583131	24583242	mfCnv1325	ENSGACG00000019264	noncoding	no	freshGreaterThanMarine	deletion
chrIV	24585944	24585989	mfCnv1326	ENSGACG00000019269	noncoding	no	freshGreaterThanMarine	deletion
chrIV	24592796	24592845	mfCnv1327	ENSGACG00000019269	noncoding	no	freshGreaterThanMarine	deletion
chrIV	24598596	24598640	mfCnv1328	ENSGACG00000019269	noncoding	no	freshGreaterThanMarine	deletion
chrIV	24599579	24599659	mfCnv1329	ENSGACG00000019269	noncoding	no	freshGreaterThanMarine	deletion
chrIV	24605752	24605948	mfCnv1330	ENSGACG00000019269	noncoding	no	freshGreaterThanMarine	deletion
chrIV	24608768	24608821	mfCnv1331	ENSGACG00000019269	noncoding	no	freshGreaterThanMarine	deletion
chrIV	24611495	24611614	mfCnv1332	ENSGACG00000019269	noncoding	yes	freshGreaterThanMarine	deletion
chrIV	24641686	24641958	mfCnv1333	ENSGACG00000019269	noncoding	no	freshGreaterThanMarine	deletion
chrIV	24659310	24659383	mfCnv1334	ENSGACG00000019269	noncoding	no	freshGreaterThanMarine	deletion
chrIV	24659470	24659901	mfCnv1335	ENSGACG00000019269	noncoding	no	freshGreaterThanMarine	deletion
chrIV	24661918	24661963	mfCnv1336	ENSGACG00000019269	noncoding	no	freshGreaterThanMarine	deletion
chrIV	24677725	24677786	mfCnv1337	ENSGACG00000019269	noncoding	no	freshGreaterThanMarine	deletion
chrIV	24678633	24678750	mfCnv1338	ENSGACG00000019269	noncoding	no	freshGreaterThanMarine	deletion
chrIV	24679155	24679823	mfCnv1339	ENSGACG00000019269	noncoding	no	freshGreaterThanMarine	deletion
chrIV	24681256	24681484	mfCnv1340	ENSGACG00000019269	noncoding	no	freshGreaterThanMarine	deletion
chrIV	24694995	24695037	mfCnv1341	ENSGACG00000019269	noncoding	yes	freshGreaterThanMarine	deletion
chrIV	24697523	24697667	mfCnv1342	ENSGACG00000019269	noncoding	no	freshGreaterThanMarine	deletion
chrIV	24703360	24703655	mfCnv1343	ENSGACG00000019269	noncoding	yes	freshGreaterThanMarine	deletion
chrIV	24715048	24715096	mfCnv1344	ENSGACG00000019269	noncoding	no	freshGreaterThanMarine	deletion
chrIV	24723808	24723887	mfCnv1345	ENSGACG00000019270	noncoding	no	freshGreaterThanMarine	deletion
chrIV	24735970	24736115	mfCnv1346	ENSGACG00000019270	noncoding	no	freshGreaterThanMarine	deletion
chrIV	24736509	24736694	mfCnv1347	ENSGACG00000019270	noncoding	no	freshGreaterThanMarine	deletion
chrIV	24739632	24739734	mfCnv1348	ENSGACG00000019270	noncoding	no	freshGreaterThanMarine	deletion
chrIV	24749250	24749477	mfCnv1349	ENSGACG00000019270	noncoding	no	freshGreaterThanMarine	deletion
chrIV	24749602	24749735	mfCnv1350	ENSGACG00000019270	noncoding	no	freshGreaterThanMarine	deletion
chrIV	24749900	24750586	mfCnv1351	ENSGACG00000019270	noncoding	no	freshGreaterThanMarine	deletion
chrIV	24750677	24751361	mfCnv1352	ENSGACG00000019270	noncoding	no	freshGreaterThanMarine	deletion
chrIV	24752454	24752520	mfCnv1353	ENSGACG00000019270	noncoding	no	freshGreaterThanMarine	deletion
chrIV	24752652	24752701	mfCnv1354	ENSGACG00000019270	noncoding	no	freshGreaterThanMarine	deletion
chrIV	24752807	24753297	mfCnv1355	ENSGACG00000019270	noncoding	no	freshGreaterThanMarine	deletion
chrIV	24753561	24753769	mfCnv1356	ENSGACG00000019270	noncoding	no	freshGreaterThanMarine	deletion
chrIV	24753889	24753966	mfCnv1357	ENSGACG00000019270	noncoding	no	freshGreaterThanMarine	deletion
chrIV	24754353	24754431	mfCnv1358	ENSGACG00000019270	noncoding	no	freshGreaterThanMarine	deletion
chrIV	24780415	24780515	mfCnv1359	ENSGACG00000019270	noncoding	no	freshGreaterThanMarine	deletion
chrIV	24783749	24783874	mfCnv1360	ENSGACG00000019270	noncoding	no	freshGreaterThanMarine	deletion
chrIV	24786246	24786303	mfCnv1361	ENSGACG00000019270	noncoding	no	freshGreaterThanMarine	deletion
chrIV	24788982	24789247	mfCnv1362	ENSGACG00000019270	noncoding	no	freshGreaterThanMarine	deletion
chrIV	24789764	24789920	mfCnv1363	ENSGACG00000019271	noncoding	no	freshGreaterThanMarine	deletion
chrIV	24800914	24800999	mfCnv1364	ENSGACG00000019271	noncoding	no	freshGreaterThanMarine	deletion
chrIV	24801693	24801734	mfCnv1365	ENSGACG00000019274	noncoding	no	freshGreaterThanMarine	deletion
chrIV	24811015	24811182	mfCnv1366	ENSGACG00000019287	noncoding	no	freshGreaterThanMarine	deletion
chrIV	24812821	24812878	mfCnv1367	ENSGACG00000019291	noncoding	no	freshGreaterThanMarine	deletion
chrIV	24813000	24813099	mfCnv1368	ENSGACG00000019291	noncoding	no	freshGreaterThanMarine	deletion
chrIV	24820796	24820844	mfCnv1369	ENSGACG00000019293	noncoding	no	freshGreaterThanMarine	deletion
chrIV	24823500	24823614	mfCnv1370	ENSGACG00000019293	noncoding	no	freshGreaterThanMarine	deletion
chrIV	24824042	24824109	mfCnv1371	ENSGACG00000019293	noncoding	no	freshGreaterThanMarine	deletion
chrIV	24869633	24870495	mfCnv1372	ENSGACG00000019313	noncoding	no	marineGreaterThanFresh	deletion
chrIV	24917204	24917785	mfCnv1373	ENSGACG00000019313	noncoding	no	marineGreaterThanFresh	deletion
chrIV	24922082	24922624	mfCnv1374	ENSGACG00000019313	noncoding	no	marineGreaterThanFresh	deletion
chrIV	24943840	24943893	mfCnv1375	ENSGACG00000019313	noncoding	no	freshGreaterThanMarine	deletion
chrIV	24945773	24945879	mfCnv1376	ENSGACG00000019313	noncoding	no	freshGreaterThanMarine	deletion
chrIV	24951413	24952068	mfCnv1377	ENSGACG00000019313	noncoding	no	freshGreaterThanMarine	deletion
chrIV	24953373	24953437	mfCnv1378	ENSGACG00000019320	noncoding	no	freshGreaterThanMarine	deletion
chrIV	24964111	24964201	mfCnv1379	ENSGACG00000019320	noncoding	no	freshGreaterThanMarine	deletion
chrIV	24983060	24983153	mfCnv1380	ENSGACG00000019323	noncoding	no	freshGreaterThanMarine	deletion
chrIV	24988442	24988500	mfCnv1381	ENSGACG00000019323	noncoding	no	freshGreaterThanMarine	deletion
chrIV	24989549	24989768	mfCnv1382	ENSGACG00000019323	noncoding	no	freshGreaterThanMarine	deletion
chrIV	24990075	24990313	mfCnv1383	ENSGACG00000019323	noncoding	no	freshGreaterThanMarine	deletion
chrIV	24996877	24996981	mfCnv1384	ENSGACG00000019323	noncoding	no	freshGreaterThanMarine	deletion
chrIV	24997912	24997968	mfCnv1385	ENSGACG00000019323	noncoding	yes	freshGreaterThanMarine	deletion
chrIV	24999723	24999865	mfCnv1386	ENSGACG00000019323	noncoding	yes	freshGreaterThanMarine	deletion
chrIV	25001816	25001896	mfCnv1387	ENSGACG00000019323	noncoding	yes	freshGreaterThanMarine	deletion
chrIV	25007758	25007811	mfCnv1388	ENSGACG00000019323	noncoding	no	freshGreaterThanMarine	deletion
chrIV	25008230	25008280	mfCnv1389	ENSGACG00000019323	noncoding	no	freshGreaterThanMarine	deletion
chrIV	25012005	25012279	mfCnv1390	ENSGACG00000019323	noncoding	no	freshGreaterThanMarine	deletion
chrIV	25019161	25019337	mfCnv1391	ENSGACG00000019323	noncoding	no	freshGreaterThanMarine	deletion
chrIV	25019734	25019814	mfCnv1392	ENSGACG00000019323	noncoding	no	freshGreaterThanMarine	deletion
chrIV	25020197	25020533	mfCnv1393	ENSGACG00000019323	noncoding	no	freshGreaterThanMarine	deletion
chrIV	25025901	25025953	mfCnv1394	ENSGACG00000019323	noncoding	no	freshGreaterThanMarine	deletion
chrIV	25029472	25029523	mfCnv1395	ENSGACG00000019323	noncoding	no	freshGreaterThanMarine	deletion
chrIV	25040193	25040255	mfCnv1396	ENSGACG00000019323	noncoding	no	freshGreaterThanMarine	deletion
chrIV	25043615	25043667	mfCnv1397	ENSGACG00000019323	noncoding	no	freshGreaterThanMarine	deletion
chrIV	25045513	25045580	mfCnv1398	ENSGACG00000019323	noncoding	no	freshGreaterThanMarine	deletion
chrIV	25046509	25046580	mfCnv1399	ENSGACG00000019323	noncoding	no	freshGreaterThanMarine	deletion
chrIV	25047123	25047209	mfCnv1400	ENSGACG00000019323	noncoding	no	freshGreaterThanMarine	deletion
chrIV	25049150	25049386	mfCnv1401	ENSGACG00000019323	noncoding	no	freshGreaterThanMarine	deletion
chrIV	25049528	25049598	mfCnv1402	ENSGACG00000019323	noncoding	no	freshGreaterThanMarine	deletion
chrIV	25049667	25049743	mfCnv1403	ENSGACG00000019323	noncoding	no	freshGreaterThanMarine	deletion
chrIV	25050699	25050765	mfCnv1404	ENSGACG00000019323	noncoding	no	freshGreaterThanMarine	deletion
chrIV	25062020	25062163	mfCnv1405	ENSGACG00000019323	noncoding	no	freshGreaterThanMarine	deletion
chrIV	25068326	25068380	mfCnv1406	ENSGACG00000019323	noncoding	no	freshGreaterThanMarine	deletion
chrIV	25083274	25083473	mfCnv1407	ENSGACG00000019323	noncoding	no	freshGreaterThanMarine	deletion
chrIV	25088480	25088541	mfCnv1408	ENSGACG00000019323	noncoding	no	freshGreaterThanMarine	deletion
chrIV	25089807	25089862	mfCnv1409	ENSGACG00000019323	noncoding	no	freshGreaterThanMarine	deletion
chrIV	25091723	25091787	mfCnv1410	ENSGACG00000019323	noncoding	no	freshGreaterThanMarine	deletion
chrIV	25104143	25104241	mfCnv1411	ENSGACG00000019325	noncoding	no	freshGreaterThanMarine	deletion
chrIV	25106967	25107062	mfCnv1412	ENSGACG00000019325	noncoding	no	freshGreaterThanMarine	deletion
chrIV	25112109	25112175	mfCnv1413	ENSGACG00000019325	noncoding	no	freshGreaterThanMarine	deletion
chrIV	25118496	25118554	mfCnv1414	ENSGACG00000019325	noncoding	no	freshGreaterThanMarine	deletion
chrIV	25119440	25119830	mfCnv1415	ENSGACG00000019325	noncoding	no	freshGreaterThanMarine	deletion
chrIV	25120958	25121015	mfCnv1416	ENSGACG00000019325	noncoding	no	freshGreaterThanMarine	deletion
chrIV	25132278	25132423	mfCnv1417	ENSGACG00000019325	noncoding	no	freshGreaterThanMarine	deletion
chrIV	25135231	25135361	mfCnv1418	ENSGACG00000019325	noncoding	no	freshGreaterThanMarine	deletion
chrIV	25137579	25137643	mfCnv1419	ENSGACG00000019325	noncoding	no	freshGreaterThanMarine	deletion
chrIV	25142047	25142107	mfCnv1420	ENSGACG00000019325	noncoding	no	freshGreaterThanMarine	deletion
chrIV	25143980	25144032	mfCnv1421	ENSGACG00000019325	noncoding	yes	freshGreaterThanMarine	deletion
chrIV	25162350	25162707	mfCnv1422	ENSGACG00000019325	noncoding	yes	freshGreaterThanMarine	deletion
chrIV	25166221	25166307	mfCnv1423	ENSGACG00000019325	noncoding	no	freshGreaterThanMarine	deletion
chrIV	25170981	25171087	mfCnv1424	ENSGACG00000019325	noncoding	no	freshGreaterThanMarine	deletion
chrIV	25176502	25176671	mfCnv1425	ENSGACG00000019325	noncoding	no	freshGreaterThanMarine	deletion
chrIV	25184111	25184171	mfCnv1426	ENSGACG00000019325	noncoding	no	freshGreaterThanMarine	deletion
chrIV	25190783	25191009	mfCnv1427	ENSGACG00000019330	noncoding	no	freshGreaterThanMarine	deletion
chrIV	25211526	25211650	mfCnv1428	ENSGACG00000019336	noncoding	no	freshGreaterThanMarine	deletion
chrIV	25217109	25217164	mfCnv1429	ENSGACG00000019336	noncoding	no	freshGreaterThanMarine	deletion
chrIV	25235456	25235535	mfCnv1430	ENSGACG00000019340	noncoding	no	freshGreaterThanMarine	deletion
chrIV	25237590	25237768	mfCnv1431	ENSGACG00000019340	noncoding	no	freshGreaterThanMarine	deletion
chrIV	25243775	25244060	mfCnv1432	ENSGACG00000019340	noncoding	no	freshGreaterThanMarine	deletion
chrIV	25269578	25269670	mfCnv1433	ENSGACG00000019340	noncoding	no	freshGreaterThanMarine	deletion
chrIV	25274305	25274354	mfCnv1434	ENSGACG00000019340	noncoding	no	freshGreaterThanMarine	deletion
chrIV	25280197	25280294	mfCnv1435	ENSGACG00000019341	noncoding	no	freshGreaterThanMarine	deletion
chrIV	25288613	25288686	mfCnv1436	ENSGACG00000019341	noncoding	no	freshGreaterThanMarine	deletion
chrIV	25292400	25292460	mfCnv1437	ENSGACG00000019341	noncoding	no	freshGreaterThanMarine	deletion
chrIV	25294469	25294515	mfCnv1438	ENSGACG00000019341	noncoding	no	freshGreaterThanMarine	deletion
chrIV	25303056	25303106	mfCnv1439	ENSGACG00000019341	noncoding	no	freshGreaterThanMarine	deletion
chrIV	25306846	25306954	mfCnv1440	ENSGACG00000019341	noncoding	no	freshGreaterThanMarine	deletion
chrIV	25307142	25307190	mfCnv1441	ENSGACG00000019341	noncoding	no	freshGreaterThanMarine	deletion
chrIV	25315920	25315984	mfCnv1442	ENSGACG00000019341	noncoding	no	freshGreaterThanMarine	deletion
chrIV	25321660	25321733	mfCnv1443	ENSGACG00000019341	noncoding	no	freshGreaterThanMarine	deletion
chrIV	25326832	25326903	mfCnv1444	ENSGACG00000019341	noncoding	yes	freshGreaterThanMarine	deletion
chrIV	25329272	25329417	mfCnv1445	ENSGACG00000019341	noncoding	no	freshGreaterThanMarine	deletion
chrIV	25452564	25452772	mfCnv1446	ENSGACG00000019346	noncoding	no	freshGreaterThanMarine	deletion
chrIV	25538097	25538623	mfCnv1447	ENSGACG00000019367	noncoding	no	marineGreaterThanFresh	both
chrIV	25549564	25550366	mfCnv1448	ENSGACG00000019367	noncoding	no	marineGreaterThanFresh	both
chrIV	25554599	25555834	mfCnv1449	ENSGACG00000019367	ENSGACG00000019508	no	marineGreaterThanFresh	duplication
chrIV	25555992	25557482	mfCnv1450	ENSGACG00000019367	ENSGACG00000019508	no	marineGreaterThanFresh	duplication
chrIV	25557850	25562316	mfCnv1451	ENSGACG00000019367	ENSGACG00000019508	no	marineGreaterThanFresh	duplication
chrIV	25563504	25567002	mfCnv1452	ENSGACG00000019367	noncoding	no	marineGreaterThanFresh	duplication
chrIV	25567387	25568944	mfCnv1453	ENSGACG00000019367	noncoding	no	marineGreaterThanFresh	duplication
chrIV	25572718	25573969	mfCnv1454	ENSGACG00000019367	noncoding	no	marineGreaterThanFresh	duplication
chrIV	25574401	25574840	mfCnv1455	ENSGACG00000019367	noncoding	no	marineGreaterThanFresh	duplication
chrIV	25575141	25575962	mfCnv1456	ENSGACG00000019367	noncoding	no	marineGreaterThanFresh	duplication
chrIV	25578243	25578301	mfCnv1457	ENSGACG00000019367	noncoding	no	marineGreaterThanFresh	deletion
chrIV	25578389	25579211	mfCnv1458	ENSGACG00000019367	noncoding	no	marineGreaterThanFresh	duplication
chrIV	25579618	25580351	mfCnv1459	ENSGACG00000019367	noncoding	no	marineGreaterThanFresh	duplication
chrIV	25582798	25583747	mfCnv1460	ENSGACG00000019367	noncoding	no	marineGreaterThanFresh	duplication
chrIV	25585717	25585912	mfCnv1461	ENSGACG00000019367	noncoding	no	marineGreaterThanFresh	duplication
chrIV	25595691	25596092	mfCnv1462	ENSGACG00000019373	noncoding	no	marineGreaterThanFresh	duplication
chrIV	25600075	25600461	mfCnv1463	ENSGACG00000019373	noncoding	no	marineGreaterThanFresh	duplication
chrIV	25601447	25602905	mfCnv1464	ENSGACG00000019373	noncoding	no	marineGreaterThanFresh	duplication
chrIV	25607247	25607733	mfCnv1465	ENSGACG00000019373	noncoding	no	marineGreaterThanFresh	duplication
chrIV	25609645	25609786	mfCnv1466	ENSGACG00000019373	noncoding	no	marineGreaterThanFresh	duplication
chrIV	25616310	25616816	mfCnv1467	ENSGACG00000019373	noncoding	no	marineGreaterThanFresh	duplication
chrIV	25623132	25624116	mfCnv1468	ENSGACG00000019386	noncoding	no	marineGreaterThanFresh	duplication
chrIV	25624347	25624965	mfCnv1469	ENSGACG00000019386	noncoding	no	marineGreaterThanFresh	duplication
chrIV	25634591	25634691	mfCnv1470	ENSGACG00000019386	noncoding	no	freshGreaterThanMarine	deletion
chrIV	25650939	25651012	mfCnv1471	ENSGACG00000019389	noncoding	no	freshGreaterThanMarine	deletion
chrIV	25654325	25654435	mfCnv1472	ENSGACG00000019389	noncoding	no	freshGreaterThanMarine	deletion
chrIV	25654714	25654864	mfCnv1473	ENSGACG00000019389	noncoding	no	freshGreaterThanMarine	deletion
chrIV	25658670	25658868	mfCnv1474	ENSGACG00000019389	noncoding	no	freshGreaterThanMarine	deletion
chrIV	25667144	25667361	mfCnv1475	ENSGACG00000019391	noncoding	no	marineGreaterThanFresh	duplication
chrIV	25695930	25696233	mfCnv1476	ENSGACG00000019404	noncoding	no	freshGreaterThanMarine	deletion
chrIV	25700236	25700399	mfCnv1477	ENSGACG00000019422	noncoding	no	freshGreaterThanMarine	deletion
chrIV	25791284	25791352	mfCnv1478	ENSGACG00000019441	noncoding	yes	freshGreaterThanMarine	deletion
chrIV	25792911	25793054	mfCnv1479	ENSGACG00000019441	noncoding	yes	freshGreaterThanMarine	deletion
chrIV	25803777	25803847	mfCnv1480	ENSGACG00000019441	noncoding	no	freshGreaterThanMarine	deletion
chrIV	25805543	25805596	mfCnv1481	ENSGACG00000019441	noncoding	no	freshGreaterThanMarine	deletion
chrIV	25814187	25814239	mfCnv1482	ENSGACG00000019445	noncoding	no	freshGreaterThanMarine	deletion
chrIV	25815001	25815124	mfCnv1483	ENSGACG00000019445	noncoding	no	freshGreaterThanMarine	deletion
chrIV	25821845	25821890	mfCnv1484	ENSGACG00000019445	noncoding	no	freshGreaterThanMarine	deletion
chrIV	25822902	25823018	mfCnv1485	ENSGACG00000019445	noncoding	no	freshGreaterThanMarine	deletion
chrIV	25828357	25828661	mfCnv1486	ENSGACG00000019445	noncoding	no	freshGreaterThanMarine	deletion
chrIV	25828819	25828908	mfCnv1487	ENSGACG00000019445	noncoding	no	freshGreaterThanMarine	deletion
chrIV	25846336	25846409	mfCnv1488	ENSGACG00000019455	noncoding	no	freshGreaterThanMarine	deletion
chrIV	25861304	25861464	mfCnv1489	ENSGACG00000019459	noncoding	no	freshGreaterThanMarine	deletion
chrIV	25868266	25868328	mfCnv1490	ENSGACG00000019459	noncoding	no	freshGreaterThanMarine	deletion
chrIV	25904291	25904347	mfCnv1491	ENSGACG00000019459	noncoding	no	freshGreaterThanMarine	deletion
chrIV	25928094	25928244	mfCnv1492	ENSGACG00000019459	noncoding	no	freshGreaterThanMarine	deletion
chrIV	25931511	25931613	mfCnv1493	ENSGACG00000019459	noncoding	no	freshGreaterThanMarine	deletion
chrIV	25937851	25938036	mfCnv1494	ENSGACG00000019459	noncoding	no	freshGreaterThanMarine	deletion
chrIV	25971558	25971604	mfCnv1495	ENSGACG00000019459	noncoding	no	freshGreaterThanMarine	deletion
chrIV	25980458	25980550	mfCnv1496	ENSGACG00000019461	noncoding	no	freshGreaterThanMarine	deletion
chrIV	25994603	25994667	mfCnv1497	ENSGACG00000019461	noncoding	no	freshGreaterThanMarine	deletion
chrIV	26005118	26005236	mfCnv1498	ENSGACG00000019461	noncoding	no	freshGreaterThanMarine	deletion
chrIV	26007436	26007618	mfCnv1499	ENSGACG00000019461	noncoding	no	freshGreaterThanMarine	deletion
chrIV	26045826	26047033	mfCnv1500	ENSGACG00000019463	noncoding	no	freshGreaterThanMarine	deletion
chrIV	26060283	26060466	mfCnv1501	ENSGACG00000019463	noncoding	no	freshGreaterThanMarine	deletion
chrIV	26062232	26062364	mfCnv1502	ENSGACG00000019467	noncoding	no	freshGreaterThanMarine	deletion
chrIV	26074190	26074717	mfCnv1503	ENSGACG00000019467	noncoding	no	freshGreaterThanMarine	deletion
chrIV	26077958	26078011	mfCnv1504	ENSGACG00000019467	noncoding	no	freshGreaterThanMarine	deletion
chrIV	26089665	26089849	mfCnv1505	ENSGACG00000019468	noncoding	no	freshGreaterThanMarine	deletion
chrIV	26090672	26091101	mfCnv1506	ENSGACG00000019468	noncoding	no	freshGreaterThanMarine	deletion
chrIV	26101485	26101772	mfCnv1507	ENSGACG00000019470	noncoding	no	freshGreaterThanMarine	deletion
chrIV	26104480	26104750	mfCnv1508	ENSGACG00000019470	noncoding	no	freshGreaterThanMarine	deletion
chrIV	26108519	26108593	mfCnv1509	ENSGACG00000019470	noncoding	no	freshGreaterThanMarine	deletion
chrIV	26123534	26123943	mfCnv1510	ENSGACG00000019472	noncoding	no	freshGreaterThanMarine	deletion
chrIV	26131640	26132130	mfCnv1511	ENSGACG00000019472	noncoding	no	freshGreaterThanMarine	deletion
chrIV	26148736	26148920	mfCnv1512	ENSGACG00000019472	noncoding	no	freshGreaterThanMarine	deletion
chrIV	26178137	26178205	mfCnv1513	ENSGACG00000019472	noncoding	no	freshGreaterThanMarine	deletion
chrIV	26201052	26201148	mfCnv1514	ENSGACG00000019472	noncoding	no	freshGreaterThanMarine	deletion
chrIV	26216331	26216394	mfCnv1515	ENSGACG00000019472	noncoding	no	freshGreaterThanMarine	deletion
chrIV	26221760	26221809	mfCnv1516	ENSGACG00000019472	noncoding	no	freshGreaterThanMarine	deletion
chrIV	26226952	26227016	mfCnv1517	ENSGACG00000019472	noncoding	no	freshGreaterThanMarine	deletion
chrIV	26228045	26228107	mfCnv1518	ENSGACG00000019472	noncoding	no	freshGreaterThanMarine	deletion
chrIV	26229347	26229419	mfCnv1519	ENSGACG00000019472	noncoding	no	freshGreaterThanMarine	deletion
chrIV	26229486	26229555	mfCnv1520	ENSGACG00000019472	noncoding	no	freshGreaterThanMarine	deletion
chrIV	26232901	26232973	mfCnv1521	ENSGACG00000019472	noncoding	no	freshGreaterThanMarine	deletion
chrIV	26235042	26235100	mfCnv1522	ENSGACG00000019472	noncoding	no	freshGreaterThanMarine	deletion
chrIV	26238100	26238266	mfCnv1523	ENSGACG00000019472	noncoding	no	freshGreaterThanMarine	deletion
chrIV	26238728	26238792	mfCnv1524	ENSGACG00000019472	noncoding	no	freshGreaterThanMarine	deletion
chrIV	26238863	26238900	mfCnv1525	ENSGACG00000019472	noncoding	no	freshGreaterThanMarine	both
chrIV	26247139	26247208	mfCnv1526	ENSGACG00000019472	noncoding	no	freshGreaterThanMarine	deletion
chrIV	26260949	26261006	mfCnv1527	ENSGACG00000019472	noncoding	no	freshGreaterThanMarine	deletion
chrIV	26264595	26264739	mfCnv1528	ENSGACG00000019472	noncoding	yes	freshGreaterThanMarine	deletion
chrIV	26271835	26271937	mfCnv1529	ENSGACG00000019472	noncoding	no	freshGreaterThanMarine	deletion
chrIV	26276241	26276294	mfCnv1530	ENSGACG00000019472	noncoding	no	freshGreaterThanMarine	deletion
chrIV	26280992	26281061	mfCnv1531	ENSGACG00000019472	noncoding	no	freshGreaterThanMarine	deletion
chrIV	26292277	26292334	mfCnv1532	ENSGACG00000019472	noncoding	no	freshGreaterThanMarine	deletion
chrIV	26297421	26297605	mfCnv1533	ENSGACG00000019472	noncoding	no	freshGreaterThanMarine	deletion
chrIV	26297857	26298369	mfCnv1534	ENSGACG00000019472	noncoding	no	freshGreaterThanMarine	deletion
chrIV	26298449	26299346	mfCnv1535	ENSGACG00000019472	noncoding	yes	freshGreaterThanMarine	deletion
chrIV	26301043	26301162	mfCnv1536	ENSGACG00000019472	noncoding	no	freshGreaterThanMarine	deletion
chrIV	26314113	26314172	mfCnv1537	ENSGACG00000019472	noncoding	no	freshGreaterThanMarine	deletion
chrIV	26316007	26316079	mfCnv1538	ENSGACG00000019472	noncoding	no	freshGreaterThanMarine	deletion
chrIV	26316458	26316832	mfCnv1539	ENSGACG00000019472	noncoding	no	freshGreaterThanMarine	deletion
chrIV	26416407	26416449	mfCnv1540	ENSGACG00000019481	noncoding	no	freshGreaterThanMarine	deletion
chrIV	26417218	26417280	mfCnv1541	ENSGACG00000019481	noncoding	no	freshGreaterThanMarine	deletion
chrIV	26423490	26423634	mfCnv1542	ENSGACG00000019481	noncoding	no	freshGreaterThanMarine	deletion
chrIV	26428595	26428640	mfCnv1543	ENSGACG00000019485	noncoding	no	freshGreaterThanMarine	deletion
chrIV	26428780	26429433	mfCnv1544	ENSGACG00000019485	noncoding	no	freshGreaterThanMarine	deletion
chrIV	26430036	26430091	mfCnv1545	ENSGACG00000019485	noncoding	no	freshGreaterThanMarine	deletion
chrIV	26431745	26431819	mfCnv1546	ENSGACG00000019485	noncoding	no	freshGreaterThanMarine	deletion
chrIV	26433388	26433449	mfCnv1547	ENSGACG00000019485	noncoding	no	freshGreaterThanMarine	deletion
chrIV	26435788	26436176	mfCnv1548	ENSGACG00000019485	noncoding	no	freshGreaterThanMarine	deletion
chrIV	26436234	26437058	mfCnv1549	ENSGACG00000019485	noncoding	no	freshGreaterThanMarine	deletion
chrIV	26437455	26437751	mfCnv1550	ENSGACG00000019485	noncoding	no	freshGreaterThanMarine	deletion
chrIV	26440647	26440782	mfCnv1551	ENSGACG00000019485	noncoding	no	freshGreaterThanMarine	deletion
chrIV	26443013	26443163	mfCnv1552	ENSGACG00000019485	noncoding	no	freshGreaterThanMarine	deletion
chrIV	26452506	26452701	mfCnv1553	ENSGACG00000019490	noncoding	no	freshGreaterThanMarine	deletion
chrIV	26469114	26469272	mfCnv1554	ENSGACG00000019490	noncoding	no	freshGreaterThanMarine	deletion
chrIV	26534290	26534343	mfCnv1555	ENSGACG00000019509	noncoding	no	freshGreaterThanMarine	deletion
chrIV	26543089	26543496	mfCnv1556	ENSGACG00000019509	noncoding	no	freshGreaterThanMarine	deletion
chrIV	26543550	26543932	mfCnv1557	ENSGACG00000019509	noncoding	no	freshGreaterThanMarine	deletion
chrIV	26543975	26544080	mfCnv1558	ENSGACG00000019509	noncoding	no	freshGreaterThanMarine	deletion
chrIV	26544215	26544346	mfCnv1559	ENSGACG00000019509	noncoding	no	freshGreaterThanMarine	deletion
chrIV	26544398	26544479	mfCnv1560	ENSGACG00000019509	noncoding	no	freshGreaterThanMarine	deletion
chrIV	26550632	26550727	mfCnv1561	ENSGACG00000019509	noncoding	no	freshGreaterThanMarine	deletion
chrIV	26668078	26668394	mfCnv1562	ENSGACG00000019518	noncoding	no	marineGreaterThanFresh	deletion
chrIV	26941494	26941786	mfCnv1563	ENSGACG00000019534	noncoding	no	marineGreaterThanFresh	both
chrIV	27499830	27499924	mfCnv1564	ENSGACG00000019610	noncoding	no	freshGreaterThanMarine	deletion
chrIV	27583199	27583254	mfCnv1565	ENSGACG00000019610	noncoding	no	freshGreaterThanMarine	deletion
chrIV	27598961	27599043	mfCnv1566	ENSGACG00000019610	noncoding	no	freshGreaterThanMarine	deletion
chrIV	27653486	27653850	mfCnv1567	ENSGACG00000019612	noncoding	no	marineGreaterThanFresh	deletion
chrIV	27728110	27728151	mfCnv1568	ENSGACG00000019612	noncoding	no	marineGreaterThanFresh	deletion
chrIV	28647176	28647220	mfCnv1569	ENSGACG00000019630	noncoding	no	marineGreaterThanFresh	deletion
chrIV	29897569	29897624	mfCnv1570	ENSGACG00000019697	noncoding	yes	marineGreaterThanFresh	deletion
chrIV	30620091	30620420	mfCnv1571	ENSGACG00000019742	noncoding	no	freshGreaterThanMarine	deletion
chrIV	30672518	30672780	mfCnv1572	ENSGACG00000019742	ENSGACG00000019835	no	freshGreaterThanMarine	deletion
chrIV	30681644	30681713	mfCnv1573	ENSGACG00000019742	noncoding	no	freshGreaterThanMarine	deletion
chrIV	30690600	30690726	mfCnv1574	ENSGACG00000019744	noncoding	no	freshGreaterThanMarine	deletion
chrIV	30954782	30954845	mfCnv1575	ENSGACG00000019785	noncoding	no	freshGreaterThanMarine	deletion
chrIV	31901097	31901245	mfCnv1576	ENSGACG00000019855	noncoding	no	freshGreaterThanMarine	deletion
chrIV	31915978	31916121	mfCnv1577	ENSGACG00000019857	noncoding	no	freshGreaterThanMarine	deletion
chrIV	31968710	31968758	mfCnv1578	ENSGACG00000019869	noncoding	no	marineGreaterThanFresh	deletion
chrIV	32176503	32176677	mfCnv1579	ENSGACG00000019955	noncoding	yes	marineGreaterThanFresh	deletion
chrIX	1004197	1004257	mfCnv1580	ENSGACG00000015888	noncoding	no	freshGreaterThanMarine	deletion
chrIX	1082877	1083252	mfCnv1581	ENSGACG00000015901	noncoding	no	freshGreaterThanMarine	deletion
chrIX	1083894	1084111	mfCnv1582	ENSGACG00000015901	noncoding	no	freshGreaterThanMarine	deletion
chrIX	2194402	2194535	mfCnv1583	ENSGACG00000016046	noncoding	no	marineGreaterThanFresh	deletion
chrIX	2244869	2245013	mfCnv1584	ENSGACG00000016047	noncoding	no	marineGreaterThanFresh	deletion
chrIX	2494770	2494894	mfCnv1585	ENSGACG00000016112	noncoding	no	freshGreaterThanMarine	deletion
chrIX	3066008	3066731	mfCnv1586	ENSGACG00000016232	noncoding	no	marineGreaterThanFresh	deletion
chrIX	3203292	3203521	mfCnv1587	ENSGACG00000016266	noncoding	no	freshGreaterThanMarine	deletion
chrIX	4541734	4541832	mfCnv1588	ENSGACG00000016390	noncoding	no	marineGreaterThanFresh	deletion
chrIX	4873108	4874165	mfCnv1589	ENSGACG00000016400	ENSGACG00000016669	yes	marineGreaterThanFresh	deletion
chrIX	5206408	5206446	mfCnv1590	ENSGACG00000016475	noncoding	no	marineGreaterThanFresh	deletion
chrIX	5401903	5401958	mfCnv1591	ENSGACG00000016508	noncoding	no	marineGreaterThanFresh	deletion
chrIX	6446810	6446868	mfCnv1592	ENSGACG00000016846	noncoding	yes	freshGreaterThanMarine	deletion
chrIX	6548508	6548563	mfCnv1593	ENSGACG00000016874	noncoding	yes	freshGreaterThanMarine	deletion
chrIX	6552347	6552422	mfCnv1594	ENSGACG00000016874	noncoding	no	freshGreaterThanMarine	deletion
chrIX	6563828	6564165	mfCnv1595	ENSGACG00000016880	noncoding	no	freshGreaterThanMarine	deletion
chrIX	6593763	6593837	mfCnv1596	ENSGACG00000016880	noncoding	no	freshGreaterThanMarine	deletion
chrIX	6915748	6915823	mfCnv1597	ENSGACG00000016964	noncoding	yes	freshGreaterThanMarine	deletion
chrIX	7050097	7050147	mfCnv1598	ENSGACG00000017044	noncoding	no	marineGreaterThanFresh	deletion
chrIX	7161012	7161068	mfCnv1599	ENSGACG00000017143	noncoding	no	freshGreaterThanMarine	deletion
chrIX	7295615	7295683	mfCnv1600	ENSGACG00000017164	noncoding	no	freshGreaterThanMarine	deletion
chrIX	8066400	8066578	mfCnv1601	ENSGACG00000017238	noncoding	yes	freshGreaterThanMarine	deletion
chrIX	8140626	8140805	mfCnv1602	ENSGACG00000017271	noncoding	no	freshGreaterThanMarine	deletion
chrIX	8363886	8364068	mfCnv1603	ENSGACG00000017308	noncoding	no	freshGreaterThanMarine	deletion
chrIX	8364148	8364296	mfCnv1604	ENSGACG00000017308	noncoding	no	freshGreaterThanMarine	deletion
chrIX	8385490	8385616	mfCnv1605	ENSGACG00000017317	noncoding	no	freshGreaterThanMarine	deletion
chrIX	8514322	8514373	mfCnv1606	ENSGACG00000017385	noncoding	no	freshGreaterThanMarine	deletion
chrIX	8517402	8517473	mfCnv1607	ENSGACG00000017385	noncoding	no	freshGreaterThanMarine	deletion
chrIX	8520208	8520330	mfCnv1608	ENSGACG00000017385	noncoding	no	freshGreaterThanMarine	deletion
chrIX	8568059	8568164	mfCnv1609	ENSGACG00000017387	noncoding	no	freshGreaterThanMarine	deletion
chrIX	8580488	8580571	mfCnv1610	ENSGACG00000017398	noncoding	no	freshGreaterThanMarine	deletion
chrIX	8586321	8586367	mfCnv1611	ENSGACG00000017398	noncoding	no	freshGreaterThanMarine	deletion
chrIX	8586563	8586613	mfCnv1612	ENSGACG00000017398	noncoding	yes	freshGreaterThanMarine	deletion
chrIX	8589464	8589551	mfCnv1613	ENSGACG00000017398	noncoding	no	freshGreaterThanMarine	deletion
chrIX	8591132	8591211	mfCnv1614	ENSGACG00000017398	noncoding	no	freshGreaterThanMarine	deletion
chrIX	8592096	8592316	mfCnv1615	ENSGACG00000017398	noncoding	no	freshGreaterThanMarine	deletion
chrIX	8593143	8593178	mfCnv1616	ENSGACG00000017398	noncoding	no	freshGreaterThanMarine	both
chrIX	8593400	8593466	mfCnv1617	ENSGACG00000017398	noncoding	no	freshGreaterThanMarine	deletion
chrIX	8595197	8595286	mfCnv1618	ENSGACG00000017398	noncoding	no	freshGreaterThanMarine	deletion
chrIX	8595924	8595990	mfCnv1619	ENSGACG00000017398	noncoding	no	freshGreaterThanMarine	deletion
chrIX	8620703	8620888	mfCnv1620	ENSGACG00000017398	noncoding	no	freshGreaterThanMarine	deletion
chrIX	8621485	8621539	mfCnv1621	ENSGACG00000017398	noncoding	no	freshGreaterThanMarine	deletion
chrIX	8655829	8656027	mfCnv1622	ENSGACG00000017398	noncoding	no	freshGreaterThanMarine	deletion
chrIX	8661078	8661136	mfCnv1623	ENSGACG00000017398	noncoding	no	freshGreaterThanMarine	deletion
chrIX	8665839	8665911	mfCnv1624	ENSGACG00000017398	noncoding	no	freshGreaterThanMarine	deletion
chrIX	8692089	8692216	mfCnv1625	ENSGACG00000017398	noncoding	no	freshGreaterThanMarine	deletion
chrIX	8735102	8735146	mfCnv1626	ENSGACG00000017398	noncoding	no	freshGreaterThanMarine	deletion
chrIX	8759481	8759531	mfCnv1627	ENSGACG00000017398	noncoding	no	freshGreaterThanMarine	deletion
chrIX	8807520	8807572	mfCnv1628	ENSGACG00000017439	noncoding	no	freshGreaterThanMarine	deletion
chrIX	8810428	8810494	mfCnv1629	ENSGACG00000017439	noncoding	no	freshGreaterThanMarine	deletion
chrIX	8829492	8829575	mfCnv1630	ENSGACG00000017439	noncoding	no	freshGreaterThanMarine	deletion
chrIX	8831077	8831136	mfCnv1631	ENSGACG00000017439	noncoding	no	freshGreaterThanMarine	deletion
chrIX	8832798	8832879	mfCnv1632	ENSGACG00000017439	noncoding	no	freshGreaterThanMarine	deletion
chrIX	8833916	8833961	mfCnv1633	ENSGACG00000017439	noncoding	no	freshGreaterThanMarine	deletion
chrIX	8837142	8837404	mfCnv1634	ENSGACG00000017439	noncoding	no	freshGreaterThanMarine	deletion
chrIX	8846199	8846350	mfCnv1635	ENSGACG00000017439	noncoding	no	freshGreaterThanMarine	deletion
chrIX	8847542	8847600	mfCnv1636	ENSGACG00000017439	noncoding	no	freshGreaterThanMarine	deletion
chrIX	8848801	8848855	mfCnv1637	ENSGACG00000017439	noncoding	no	freshGreaterThanMarine	deletion
chrIX	8849254	8849306	mfCnv1638	ENSGACG00000017439	noncoding	no	freshGreaterThanMarine	deletion
chrIX	8849463	8849579	mfCnv1639	ENSGACG00000017439	noncoding	no	freshGreaterThanMarine	deletion
chrIX	8879519	8879589	mfCnv1640	ENSGACG00000017439	noncoding	no	freshGreaterThanMarine	deletion
chrIX	8884238	8884291	mfCnv1641	ENSGACG00000017439	noncoding	no	freshGreaterThanMarine	deletion
chrIX	8887263	8887308	mfCnv1642	ENSGACG00000017439	noncoding	no	freshGreaterThanMarine	deletion
chrIX	8888246	8888316	mfCnv1643	ENSGACG00000017439	noncoding	no	freshGreaterThanMarine	deletion
chrIX	8891459	8891524	mfCnv1644	ENSGACG00000017439	noncoding	no	freshGreaterThanMarine	deletion
chrIX	8903276	8903654	mfCnv1645	ENSGACG00000017439	noncoding	no	freshGreaterThanMarine	deletion
chrIX	8907553	8907667	mfCnv1646	ENSGACG00000017439	noncoding	no	freshGreaterThanMarine	deletion
chrIX	8910849	8910913	mfCnv1647	ENSGACG00000017439	noncoding	yes	freshGreaterThanMarine	deletion
chrIX	9182479	9182763	mfCnv1648	ENSGACG00000017536	noncoding	no	freshGreaterThanMarine	deletion
chrIX	9189083	9189186	mfCnv1649	ENSGACG00000017536	noncoding	no	freshGreaterThanMarine	deletion
chrIX	9203709	9203775	mfCnv1650	ENSGACG00000017536	noncoding	no	freshGreaterThanMarine	deletion
chrIX	9205235	9205452	mfCnv1651	ENSGACG00000017536	noncoding	no	freshGreaterThanMarine	deletion
chrIX	9280600	9280861	mfCnv1652	ENSGACG00000017558	noncoding	no	freshGreaterThanMarine	deletion
chrIX	9310022	9310214	mfCnv1653	ENSGACG00000017558	noncoding	no	freshGreaterThanMarine	deletion
chrIX	9461184	9462126	mfCnv1654	ENSGACG00000017615	noncoding	no	freshGreaterThanMarine	duplication
chrIX	9474638	9475085	mfCnv1655	ENSGACG00000017615	noncoding	no	freshGreaterThanMarine	deletion
chrIX	9521784	9521863	mfCnv1656	ENSGACG00000017626	noncoding	no	freshGreaterThanMarine	deletion
chrIX	9522571	9522696	mfCnv1657	ENSGACG00000017626	noncoding	no	freshGreaterThanMarine	deletion
chrIX	9848895	9848994	mfCnv1658	ENSGACG00000017900	noncoding	no	freshGreaterThanMarine	deletion
chrIX	10105027	10105214	mfCnv1659	ENSGACG00000017985	noncoding	no	marineGreaterThanFresh	deletion
chrIX	10214234	10214279	mfCnv1660	ENSGACG00000017985	noncoding	no	freshGreaterThanMarine	deletion
chrIX	10215617	10216050	mfCnv1661	ENSGACG00000017985	noncoding	no	freshGreaterThanMarine	deletion
chrIX	10224204	10224852	mfCnv1662	ENSGACG00000017985	noncoding	no	freshGreaterThanMarine	deletion
chrIX	10231839	10231910	mfCnv1663	ENSGACG00000017985	noncoding	no	freshGreaterThanMarine	deletion
chrIX	10235592	10235643	mfCnv1664	ENSGACG00000017985	noncoding	no	freshGreaterThanMarine	deletion
chrIX	10302798	10302849	mfCnv1665	ENSGACG00000017985	noncoding	no	freshGreaterThanMarine	deletion
chrIX	10360853	10360933	mfCnv1666	ENSGACG00000017994	noncoding	no	freshGreaterThanMarine	deletion
chrIX	10414559	10414612	mfCnv1667	ENSGACG00000017996	noncoding	yes	freshGreaterThanMarine	deletion
chrIX	10690498	10691087	mfCnv1668	ENSGACG00000018034	noncoding	no	freshGreaterThanMarine	duplication
chrIX	10691087	10691368	mfCnv1669	ENSGACG00000018034	noncoding	no	freshGreaterThanMarine	both
chrIX	10692261	10692528	mfCnv1670	ENSGACG00000018034	noncoding	no	freshGreaterThanMarine	duplication
chrIX	10692567	10692787	mfCnv1671	ENSGACG00000018034	noncoding	no	freshGreaterThanMarine	both
chrIX	10693574	10695956	mfCnv1672	ENSGACG00000018034	noncoding	no	freshGreaterThanMarine	both
chrIX	10696077	10696369	mfCnv1673	ENSGACG00000018034	noncoding	no	freshGreaterThanMarine	both
chrIX	10696628	10697007	mfCnv1674	ENSGACG00000018034	noncoding	no	freshGreaterThanMarine	deletion
chrIX	10697105	10697529	mfCnv1675	ENSGACG00000018034	noncoding	no	freshGreaterThanMarine	deletion
chrIX	10697872	10698742	mfCnv1676	ENSGACG00000018034	noncoding	no	freshGreaterThanMarine	both
chrIX	10698742	10699242	mfCnv1677	ENSGACG00000018034	noncoding	no	freshGreaterThanMarine	deletion
chrIX	10699713	10700347	mfCnv1678	ENSGACG00000018034	noncoding	no	freshGreaterThanMarine	both
chrIX	10701546	10702984	mfCnv1679	ENSGACG00000018034	noncoding	no	freshGreaterThanMarine	both
chrIX	10703792	10703857	mfCnv1680	ENSGACG00000018034	noncoding	no	freshGreaterThanMarine	deletion
chrIX	10706121	10706443	mfCnv1681	ENSGACG00000018034	noncoding	no	freshGreaterThanMarine	both
chrIX	10710822	10710882	mfCnv1682	ENSGACG00000018034	noncoding	yes	freshGreaterThanMarine	deletion
chrIX	10955525	10955578	mfCnv1683	ENSGACG00000018104	noncoding	no	freshGreaterThanMarine	deletion
chrIX	10957968	10958010	mfCnv1684	ENSGACG00000018104	noncoding	no	freshGreaterThanMarine	deletion
chrIX	10960834	10960905	mfCnv1685	ENSGACG00000018104	noncoding	no	freshGreaterThanMarine	deletion
chrIX	10962331	10962384	mfCnv1686	ENSGACG00000018104	noncoding	no	freshGreaterThanMarine	deletion
chrIX	10963557	10963628	mfCnv1687	ENSGACG00000018104	noncoding	no	freshGreaterThanMarine	deletion
chrIX	10965233	10965292	mfCnv1688	ENSGACG00000018104	noncoding	no	freshGreaterThanMarine	deletion
chrIX	11192813	11193069	mfCnv1689	ENSGACG00000018163	ENSGACG00000018358	no	freshGreaterThanMarine	deletion
chrIX	11206390	11206610	mfCnv1690	ENSGACG00000018170	noncoding	no	freshGreaterThanMarine	deletion
chrIX	11215842	11215904	mfCnv1691	ENSGACG00000018178	noncoding	no	freshGreaterThanMarine	deletion
chrIX	11234089	11234142	mfCnv1692	ENSGACG00000018185	noncoding	no	freshGreaterThanMarine	deletion
chrIX	11293226	11293636	mfCnv1693	ENSGACG00000018193	noncoding	no	freshGreaterThanMarine	deletion
chrIX	11294653	11294771	mfCnv1694	ENSGACG00000018193	noncoding	no	freshGreaterThanMarine	deletion
chrIX	11302701	11302756	mfCnv1695	ENSGACG00000018193	noncoding	no	freshGreaterThanMarine	deletion
chrIX	12126897	12126957	mfCnv1696	ENSGACG00000018356	noncoding	no	freshGreaterThanMarine	deletion
chrIX	12214181	12214259	mfCnv1697	ENSGACG00000018364	noncoding	no	freshGreaterThanMarine	deletion
chrIX	12214313	12214415	mfCnv1698	ENSGACG00000018364	noncoding	no	freshGreaterThanMarine	deletion
chrIX	12214589	12215118	mfCnv1699	ENSGACG00000018364	noncoding	no	freshGreaterThanMarine	deletion
chrIX	12215960	12216206	mfCnv1700	ENSGACG00000018364	noncoding	no	freshGreaterThanMarine	deletion
chrIX	12239566	12239643	mfCnv1701	ENSGACG00000018364	noncoding	no	freshGreaterThanMarine	deletion
chrIX	12268170	12268223	mfCnv1702	ENSGACG00000018365	noncoding	no	freshGreaterThanMarine	deletion
chrIX	12272681	12272825	mfCnv1703	ENSGACG00000018365	noncoding	no	freshGreaterThanMarine	deletion
chrIX	12457881	12458009	mfCnv1704	ENSGACG00000018400	noncoding	no	freshGreaterThanMarine	deletion
chrIX	12480745	12480811	mfCnv1705	ENSGACG00000018409	noncoding	no	freshGreaterThanMarine	deletion
chrIX	12481575	12481747	mfCnv1706	ENSGACG00000018409	noncoding	no	freshGreaterThanMarine	deletion
chrIX	12702486	12702679	mfCnv1707	ENSGACG00000018410	noncoding	no	freshGreaterThanMarine	deletion
chrIX	12749787	12749831	mfCnv1708	ENSGACG00000018410	noncoding	no	freshGreaterThanMarine	deletion
chrIX	12827854	12827899	mfCnv1709	ENSGACG00000018410	noncoding	no	freshGreaterThanMarine	deletion
chrIX	12858507	12858585	mfCnv1710	ENSGACG00000018410	noncoding	no	freshGreaterThanMarine	deletion
chrIX	12860669	12860733	mfCnv1711	ENSGACG00000018410	noncoding	no	freshGreaterThanMarine	deletion
chrIX	12885295	12885405	mfCnv1712	ENSGACG00000018415	noncoding	no	freshGreaterThanMarine	deletion
chrIX	12903219	12903711	mfCnv1713	ENSGACG00000018415	noncoding	yes	freshGreaterThanMarine	deletion
chrIX	12910676	12910984	mfCnv1714	ENSGACG00000018415	noncoding	no	freshGreaterThanMarine	deletion
chrIX	12916072	12916132	mfCnv1715	ENSGACG00000018415	noncoding	no	freshGreaterThanMarine	deletion
chrIX	13001973	13002030	mfCnv1716	ENSGACG00000018415	noncoding	no	freshGreaterThanMarine	deletion
chrIX	13006268	13006424	mfCnv1717	ENSGACG00000018415	noncoding	no	freshGreaterThanMarine	deletion
chrIX	13075646	13075880	mfCnv1718	ENSGACG00000018415	noncoding	no	freshGreaterThanMarine	deletion
chrIX	13076430	13076898	mfCnv1719	ENSGACG00000018415	noncoding	no	freshGreaterThanMarine	deletion
chrIX	13079144	13079535	mfCnv1720	ENSGACG00000018415	noncoding	no	freshGreaterThanMarine	deletion
chrIX	13079535	13081284	mfCnv1721	ENSGACG00000018415	noncoding	no	freshGreaterThanMarine	deletion
chrIX	13252406	13252465	mfCnv1722	ENSGACG00000018454	noncoding	no	freshGreaterThanMarine	deletion
chrIX	13253868	13253953	mfCnv1723	ENSGACG00000018454	noncoding	no	freshGreaterThanMarine	deletion
chrIX	13280340	13280473	mfCnv1724	ENSGACG00000018463	noncoding	no	freshGreaterThanMarine	deletion
chrIX	13391636	13391703	mfCnv1725	ENSGACG00000018479	noncoding	no	freshGreaterThanMarine	deletion
chrIX	13425802	13425871	mfCnv1726	ENSGACG00000018479	noncoding	no	freshGreaterThanMarine	deletion
chrIX	13641797	13642090	mfCnv1727	ENSGACG00000018506	noncoding	yes	marineGreaterThanFresh	both
chrIX	13656375	13656536	mfCnv1728	ENSGACG00000018506	noncoding	no	freshGreaterThanMarine	deletion
chrIX	13657058	13657777	mfCnv1729	ENSGACG00000018506	noncoding	no	freshGreaterThanMarine	deletion
chrIX	13760195	13760242	mfCnv1730	ENSGACG00000018519	noncoding	no	marineGreaterThanFresh	deletion
chrIX	13820024	13820143	mfCnv1731	ENSGACG00000018521	noncoding	no	freshGreaterThanMarine	deletion
chrIX	13864164	13864228	mfCnv1732	ENSGACG00000018521	noncoding	no	freshGreaterThanMarine	deletion
chrIX	13870269	13870324	mfCnv1733	ENSGACG00000018521	noncoding	no	freshGreaterThanMarine	deletion
chrIX	13979636	13979690	mfCnv1734	ENSGACG00000018563	noncoding	no	freshGreaterThanMarine	deletion
chrIX	14041300	14041355	mfCnv1735	ENSGACG00000018568	noncoding	no	freshGreaterThanMarine	deletion
chrIX	14072952	14072999	mfCnv1736	ENSGACG00000018576	noncoding	no	freshGreaterThanMarine	deletion
chrIX	14120193	14120329	mfCnv1737	ENSGACG00000018576	noncoding	no	marineGreaterThanFresh	deletion
chrIX	14628819	14628931	mfCnv1738	ENSGACG00000018604	noncoding	no	marineGreaterThanFresh	deletion
chrIX	14634746	14634877	mfCnv1739	ENSGACG00000018609	noncoding	no	marineGreaterThanFresh	deletion
chrIX	14635245	14635306	mfCnv1740	ENSGACG00000018609	noncoding	no	marineGreaterThanFresh	deletion
chrIX	14637196	14637459	mfCnv1741	ENSGACG00000018609	noncoding	no	marineGreaterThanFresh	deletion
chrIX	14639447	14639675	mfCnv1742	ENSGACG00000018612	noncoding	no	marineGreaterThanFresh	deletion
chrIX	14670641	14671765	mfCnv1743	ENSGACG00000018621	ENSGACG00000018848	yes	freshGreaterThanMarine	deletion
chrIX	14672132	14672368	mfCnv1744	ENSGACG00000018621	ENSGACG00000018848	yes	freshGreaterThanMarine	deletion
chrIX	14672617	14672854	mfCnv1745	ENSGACG00000018621	noncoding	no	freshGreaterThanMarine	deletion
chrIX	14952681	14954682	mfCnv1746	ENSGACG00000018708	ENSGACG00000018944	yes	marineGreaterThanFresh	duplication
chrIX	15159304	15159801	mfCnv1747	ENSGACG00000018732	noncoding	no	marineGreaterThanFresh	duplication
chrIX	16181168	16181217	mfCnv1748	ENSGACG00000019015	noncoding	no	freshGreaterThanMarine	deletion
chrIX	16428345	16429154	mfCnv1749	ENSGACG00000019103	noncoding	no	freshGreaterThanMarine	duplication
chrIX	16542737	16542776	mfCnv1750	ENSGACG00000019146	noncoding	no	marineGreaterThanFresh	deletion
chrIX	16593583	16593635	mfCnv1751	ENSGACG00000019164	noncoding	no	freshGreaterThanMarine	deletion
chrIX	16596121	16596173	mfCnv1752	ENSGACG00000019168	noncoding	no	freshGreaterThanMarine	deletion
chrIX	17016040	17016091	mfCnv1753	ENSGACG00000019222	noncoding	no	freshGreaterThanMarine	deletion
chrIX	17031149	17031314	mfCnv1754	ENSGACG00000019222	noncoding	no	freshGreaterThanMarine	deletion
chrIX	17039422	17039489	mfCnv1755	ENSGACG00000019222	noncoding	no	freshGreaterThanMarine	deletion
chrIX	17045724	17045776	mfCnv1756	ENSGACG00000019228	noncoding	no	freshGreaterThanMarine	deletion
chrIX	17048077	17048185	mfCnv1757	ENSGACG00000019228	noncoding	no	freshGreaterThanMarine	deletion
chrIX	17051799	17052049	mfCnv1758	ENSGACG00000019228	noncoding	no	freshGreaterThanMarine	deletion
chrIX	17057174	17057338	mfCnv1759	ENSGACG00000019228	noncoding	yes	freshGreaterThanMarine	deletion
chrIX	17062248	17062306	mfCnv1760	ENSGACG00000019228	noncoding	no	freshGreaterThanMarine	deletion
chrIX	17063224	17063404	mfCnv1761	ENSGACG00000019228	noncoding	no	freshGreaterThanMarine	deletion
chrIX	17071028	17071098	mfCnv1762	ENSGACG00000019231	noncoding	no	freshGreaterThanMarine	deletion
chrIX	17076779	17076833	mfCnv1763	ENSGACG00000019237	noncoding	no	freshGreaterThanMarine	deletion
chrIX	17078625	17078672	mfCnv1764	ENSGACG00000019237	noncoding	no	freshGreaterThanMarine	deletion
chrIX	17108337	17108641	mfCnv1765	ENSGACG00000019246	noncoding	no	freshGreaterThanMarine	deletion
chrIX	17113076	17113183	mfCnv1766	ENSGACG00000019254	noncoding	no	freshGreaterThanMarine	deletion
chrIX	17113709	17113775	mfCnv1767	ENSGACG00000019254	noncoding	no	freshGreaterThanMarine	deletion
chrIX	17114573	17115154	mfCnv1768	ENSGACG00000019254	noncoding	no	freshGreaterThanMarine	deletion
chrIX	17116636	17116822	mfCnv1769	ENSGACG00000019254	noncoding	no	freshGreaterThanMarine	deletion
chrIX	17118292	17118334	mfCnv1770	ENSGACG00000019254	noncoding	no	freshGreaterThanMarine	deletion
chrIX	17120034	17120127	mfCnv1771	ENSGACG00000019254	noncoding	no	freshGreaterThanMarine	deletion
chrIX	17122432	17122475	mfCnv1772	ENSGACG00000019254	noncoding	no	freshGreaterThanMarine	deletion
chrIX	17199343	17199385	mfCnv1773	ENSGACG00000019276	noncoding	no	marineGreaterThanFresh	deletion
chrIX	17698962	17699011	mfCnv1774	ENSGACG00000019357	noncoding	no	marineGreaterThanFresh	deletion
chrIX	18542548	18543031	mfCnv1775	ENSGACG00000019448	noncoding	no	freshGreaterThanMarine	deletion
chrIX	18623481	18623558	mfCnv1776	ENSGACG00000019454	noncoding	no	freshGreaterThanMarine	deletion
chrIX	18628705	18628828	mfCnv1777	ENSGACG00000019462	ENSGACG00000019635	no	freshGreaterThanMarine	deletion
chrIX	18644150	18644309	mfCnv1778	ENSGACG00000019462	ENSGACG00000019636	no	freshGreaterThanMarine	deletion
chrIX	18977520	18977995	mfCnv1779	ENSGACG00000019523	noncoding	no	freshGreaterThanMarine	deletion
chrIX	18980303	18980377	mfCnv1780	ENSGACG00000019523	noncoding	no	freshGreaterThanMarine	deletion
chrIX	19156567	19156662	mfCnv1781	ENSGACG00000019556	noncoding	no	marineGreaterThanFresh	deletion
chrIX	19162309	19162515	mfCnv1782	ENSGACG00000019556	noncoding	no	freshGreaterThanMarine	deletion
chrIX	19162779	19162976	mfCnv1783	ENSGACG00000019556	noncoding	no	freshGreaterThanMarine	deletion
chrIX	19163226	19163410	mfCnv1784	ENSGACG00000019556	noncoding	no	freshGreaterThanMarine	deletion
chrIX	19165366	19165956	mfCnv1785	ENSGACG00000019556	noncoding	no	freshGreaterThanMarine	deletion
chrIX	19219566	19219695	mfCnv1786	ENSGACG00000019559	noncoding	no	freshGreaterThanMarine	deletion
chrIX	19220427	19220600	mfCnv1787	ENSGACG00000019562	noncoding	no	freshGreaterThanMarine	deletion
chrIX	19220639	19220881	mfCnv1788	ENSGACG00000019562	noncoding	no	freshGreaterThanMarine	both
chrIX	19358070	19358626	mfCnv1789	ENSGACG00000019581	noncoding	no	freshGreaterThanMarine	duplication
chrIX	19358707	19358766	mfCnv1790	ENSGACG00000019582	noncoding	no	freshGreaterThanMarine	deletion
chrIX	19393861	19394189	mfCnv1791	ENSGACG00000019589	noncoding	no	freshGreaterThanMarine	both
chrIX	19400196	19400269	mfCnv1792	ENSGACG00000019589	noncoding	yes	freshGreaterThanMarine	deletion
chrIX	19435641	19435804	mfCnv1793	ENSGACG00000019600	noncoding	no	freshGreaterThanMarine	deletion
chrIX	19466654	19466732	mfCnv1794	ENSGACG00000019600	noncoding	no	freshGreaterThanMarine	deletion
chrIX	19644655	19644775	mfCnv1795	ENSGACG00000019637	noncoding	no	freshGreaterThanMarine	deletion
chrIX	19674538	19674713	mfCnv1796	ENSGACG00000019642	noncoding	no	freshGreaterThanMarine	deletion
chrIX	19675905	19676475	mfCnv1797	ENSGACG00000019642	noncoding	no	freshGreaterThanMarine	deletion
chrIX	19678562	19678993	mfCnv1798	ENSGACG00000019661	noncoding	no	freshGreaterThanMarine	deletion
chrUn	155377	156357	mfCnv1799	ENSGACG00000000302	noncoding	no	freshGreaterThanMarine	deletion
chrUn	2357026	2357323	mfCnv1800	ENSGACG00000000614	ENSGACG00000000833	yes	marineGreaterThanFresh	deletion
chrUn	4145566	4145675	mfCnv1801	ENSGACG00000001085	noncoding	no	freshGreaterThanMarine	deletion
chrUn	4145922	4145973	mfCnv1802	ENSGACG00000001085	noncoding	no	freshGreaterThanMarine	deletion
chrUn	4158327	4158781	mfCnv1803	ENSGACG00000001085	noncoding	no	marineGreaterThanFresh	deletion
chrUn	4178098	4178238	mfCnv1804	ENSGACG00000001089	noncoding	no	freshGreaterThanMarine	deletion
chrUn	4622506	4622562	mfCnv1805	ENSGACG00000001303	noncoding	no	freshGreaterThanMarine	deletion
chrUn	4926634	4926704	mfCnv1806	ENSGACG00000001373	noncoding	no	freshGreaterThanMarine	deletion
chrUn	4962497	4962556	mfCnv1807	ENSGACG00000001373	noncoding	yes	freshGreaterThanMarine	deletion
chrUn	5114183	5114309	mfCnv1808	ENSGACG00000001392	noncoding	no	freshGreaterThanMarine	deletion
chrUn	5123527	5123948	mfCnv1809	ENSGACG00000001392	noncoding	no	freshGreaterThanMarine	deletion
chrUn	5125385	5125466	mfCnv1810	ENSGACG00000001392	noncoding	no	freshGreaterThanMarine	deletion
chrUn	5126167	5126249	mfCnv1811	ENSGACG00000001392	noncoding	no	freshGreaterThanMarine	deletion
chrUn	5126605	5126720	mfCnv1812	ENSGACG00000001392	noncoding	no	freshGreaterThanMarine	deletion
chrUn	5126790	5126935	mfCnv1813	ENSGACG00000001392	noncoding	no	freshGreaterThanMarine	deletion
chrUn	5127409	5127545	mfCnv1814	ENSGACG00000001392	noncoding	no	freshGreaterThanMarine	deletion
chrUn	5129121	5129235	mfCnv1815	ENSGACG00000001392	noncoding	no	freshGreaterThanMarine	deletion
chrUn	5137954	5138054	mfCnv1816	ENSGACG00000001392	noncoding	no	freshGreaterThanMarine	deletion
chrUn	5138368	5138458	mfCnv1817	ENSGACG00000001392	noncoding	no	freshGreaterThanMarine	deletion
chrUn	5141094	5141141	mfCnv1818	ENSGACG00000001398	noncoding	no	freshGreaterThanMarine	deletion
chrUn	5141736	5141795	mfCnv1819	ENSGACG00000001398	noncoding	no	freshGreaterThanMarine	deletion
chrUn	5145090	5145385	mfCnv1820	ENSGACG00000001398	noncoding	no	freshGreaterThanMarine	deletion
chrUn	5146133	5146189	mfCnv1821	ENSGACG00000001398	noncoding	no	freshGreaterThanMarine	deletion
chrUn	5148448	5148653	mfCnv1822	ENSGACG00000001434	noncoding	no	freshGreaterThanMarine	deletion
chrUn	5150716	5150835	mfCnv1823	ENSGACG00000001434	noncoding	no	freshGreaterThanMarine	deletion
chrUn	5153216	5153308	mfCnv1824	ENSGACG00000001434	noncoding	no	freshGreaterThanMarine	deletion
chrUn	5163886	5164046	mfCnv1825	ENSGACG00000001437	noncoding	no	freshGreaterThanMarine	deletion
chrUn	5165732	5165822	mfCnv1826	ENSGACG00000001437	noncoding	no	freshGreaterThanMarine	deletion
chrUn	5168366	5168465	mfCnv1827	ENSGACG00000001437	noncoding	no	freshGreaterThanMarine	deletion
chrUn	5168551	5168691	mfCnv1828	ENSGACG00000001437	noncoding	no	freshGreaterThanMarine	deletion
chrUn	5168890	5169188	mfCnv1829	ENSGACG00000001437	noncoding	no	freshGreaterThanMarine	deletion
chrUn	5169403	5169710	mfCnv1830	ENSGACG00000001437	noncoding	no	freshGreaterThanMarine	deletion
chrUn	5170120	5170206	mfCnv1831	ENSGACG00000001437	noncoding	no	freshGreaterThanMarine	deletion
chrUn	5179387	5179465	mfCnv1832	ENSGACG00000001466	noncoding	no	freshGreaterThanMarine	deletion
chrUn	5180583	5180668	mfCnv1833	ENSGACG00000001466	noncoding	no	freshGreaterThanMarine	deletion
chrUn	5185808	5185896	mfCnv1834	ENSGACG00000001466	noncoding	no	freshGreaterThanMarine	deletion
chrUn	5190726	5190783	mfCnv1835	ENSGACG00000001466	noncoding	no	freshGreaterThanMarine	deletion
chrUn	5191118	5191174	mfCnv1836	ENSGACG00000001466	noncoding	no	freshGreaterThanMarine	deletion
chrUn	5197857	5197993	mfCnv1837	ENSGACG00000001473	noncoding	no	freshGreaterThanMarine	deletion
chrUn	5201126	5201186	mfCnv1838	ENSGACG00000001473	noncoding	no	freshGreaterThanMarine	deletion
chrUn	5202636	5202827	mfCnv1839	ENSGACG00000001473	noncoding	no	freshGreaterThanMarine	deletion
chrUn	5203026	5203108	mfCnv1840	ENSGACG00000001473	noncoding	no	freshGreaterThanMarine	deletion
chrUn	5213321	5213388	mfCnv1841	ENSGACG00000001475	noncoding	no	freshGreaterThanMarine	deletion
chrUn	5248607	5248681	mfCnv1842	ENSGACG00000001483	noncoding	no	freshGreaterThanMarine	deletion
chrUn	5254621	5254675	mfCnv1843	ENSGACG00000001483	noncoding	no	freshGreaterThanMarine	deletion
chrUn	5258757	5258957	mfCnv1844	ENSGACG00000001483	noncoding	no	freshGreaterThanMarine	deletion
chrUn	5272119	5272318	mfCnv1845	ENSGACG00000001497	noncoding	no	freshGreaterThanMarine	deletion
chrUn	5273242	5273338	mfCnv1846	ENSGACG00000001497	noncoding	no	freshGreaterThanMarine	deletion
chrUn	5273897	5273941	mfCnv1847	ENSGACG00000001497	noncoding	no	freshGreaterThanMarine	deletion
chrUn	5275394	5275514	mfCnv1848	ENSGACG00000001497	noncoding	no	freshGreaterThanMarine	deletion
chrUn	5276017	5276320	mfCnv1849	ENSGACG00000001497	noncoding	no	freshGreaterThanMarine	deletion
chrUn	5278590	5278962	mfCnv1850	ENSGACG00000001497	noncoding	no	freshGreaterThanMarine	both
chrUn	5282580	5282630	mfCnv1851	ENSGACG00000001497	noncoding	no	freshGreaterThanMarine	deletion
chrUn	5282854	5282914	mfCnv1852	ENSGACG00000001497	noncoding	no	freshGreaterThanMarine	deletion
chrUn	5285919	5286008	mfCnv1853	ENSGACG00000001497	noncoding	no	freshGreaterThanMarine	deletion
chrUn	5286134	5286221	mfCnv1854	ENSGACG00000001497	noncoding	no	freshGreaterThanMarine	deletion
chrUn	5294549	5294617	mfCnv1855	ENSGACG00000001500	noncoding	no	freshGreaterThanMarine	deletion
chrUn	5297706	5297816	mfCnv1856	ENSGACG00000001503	noncoding	no	freshGreaterThanMarine	deletion
chrUn	5305999	5306048	mfCnv1857	ENSGACG00000001503	noncoding	no	freshGreaterThanMarine	deletion
chrUn	5310357	5310427	mfCnv1858	ENSGACG00000001503	noncoding	no	freshGreaterThanMarine	deletion
chrUn	5311528	5311585	mfCnv1859	ENSGACG00000001503	noncoding	no	freshGreaterThanMarine	deletion
chrUn	5316933	5317329	mfCnv1860	ENSGACG00000001503	noncoding	no	freshGreaterThanMarine	deletion
chrUn	5321973	5322035	mfCnv1861	ENSGACG00000001503	noncoding	no	freshGreaterThanMarine	deletion
chrUn	5329399	5329510	mfCnv1862	ENSGACG00000001503	noncoding	no	freshGreaterThanMarine	deletion
chrUn	5334548	5334651	mfCnv1863	ENSGACG00000001503	noncoding	no	freshGreaterThanMarine	deletion
chrUn	5340326	5340471	mfCnv1864	ENSGACG00000001503	noncoding	no	freshGreaterThanMarine	deletion
chrUn	5350017	5350187	mfCnv1865	ENSGACG00000001510	noncoding	no	freshGreaterThanMarine	deletion
chrUn	5350619	5350731	mfCnv1866	ENSGACG00000001510	noncoding	no	freshGreaterThanMarine	deletion
chrUn	5356252	5356337	mfCnv1867	ENSGACG00000001513	noncoding	no	freshGreaterThanMarine	deletion
chrUn	5367010	5367154	mfCnv1868	ENSGACG00000001513	noncoding	no	freshGreaterThanMarine	deletion
chrUn	5381670	5381732	mfCnv1869	ENSGACG00000001520	noncoding	no	freshGreaterThanMarine	deletion
chrUn	5382446	5382492	mfCnv1870	ENSGACG00000001520	noncoding	no	freshGreaterThanMarine	deletion
chrUn	5389016	5389283	mfCnv1871	ENSGACG00000001520	noncoding	no	freshGreaterThanMarine	deletion
chrUn	5394573	5394705	mfCnv1872	ENSGACG00000001522	noncoding	no	freshGreaterThanMarine	deletion
chrUn	5397684	5397787	mfCnv1873	ENSGACG00000001522	noncoding	no	freshGreaterThanMarine	deletion
chrUn	5403261	5403331	mfCnv1874	ENSGACG00000001522	noncoding	no	freshGreaterThanMarine	deletion
chrUn	5406279	5406560	mfCnv1875	ENSGACG00000001528	noncoding	no	freshGreaterThanMarine	deletion
chrUn	5407476	5407755	mfCnv1876	ENSGACG00000001528	noncoding	no	freshGreaterThanMarine	deletion
chrUn	5416810	5416919	mfCnv1877	ENSGACG00000001528	noncoding	no	freshGreaterThanMarine	deletion
chrUn	5418491	5418667	mfCnv1878	ENSGACG00000001528	noncoding	no	freshGreaterThanMarine	deletion
chrUn	5419607	5419662	mfCnv1879	ENSGACG00000001528	noncoding	no	freshGreaterThanMarine	deletion
chrUn	5425848	5425916	mfCnv1880	ENSGACG00000001544	noncoding	no	freshGreaterThanMarine	deletion
chrUn	5427730	5427777	mfCnv1881	ENSGACG00000001544	noncoding	no	freshGreaterThanMarine	deletion
chrUn	5428032	5428137	mfCnv1882	ENSGACG00000001544	noncoding	no	freshGreaterThanMarine	deletion
chrUn	5430779	5430876	mfCnv1883	ENSGACG00000001544	noncoding	no	freshGreaterThanMarine	deletion
chrUn	5437949	5438010	mfCnv1884	ENSGACG00000001544	noncoding	no	freshGreaterThanMarine	deletion
chrUn	5442234	5442326	mfCnv1885	ENSGACG00000001544	noncoding	no	freshGreaterThanMarine	deletion
chrUn	5445293	5446154	mfCnv1886	ENSGACG00000001544	noncoding	no	freshGreaterThanMarine	deletion
chrUn	5450365	5450775	mfCnv1887	ENSGACG00000001544	noncoding	no	freshGreaterThanMarine	deletion
chrUn	5454384	5454563	mfCnv1888	ENSGACG00000001544	noncoding	no	freshGreaterThanMarine	deletion
chrUn	5457149	5457239	mfCnv1889	ENSGACG00000001544	noncoding	no	freshGreaterThanMarine	deletion
chrUn	5457420	5457496	mfCnv1890	ENSGACG00000001544	noncoding	no	freshGreaterThanMarine	deletion
chrUn	5459218	5459348	mfCnv1891	ENSGACG00000001544	noncoding	no	freshGreaterThanMarine	deletion
chrUn	5460383	5460504	mfCnv1892	ENSGACG00000001544	noncoding	no	freshGreaterThanMarine	deletion
chrUn	5461785	5461852	mfCnv1893	ENSGACG00000001544	noncoding	no	freshGreaterThanMarine	deletion
chrUn	5473952	5474051	mfCnv1894	ENSGACG00000001553	noncoding	no	freshGreaterThanMarine	deletion
chrUn	5475451	5475501	mfCnv1895	ENSGACG00000001553	noncoding	no	freshGreaterThanMarine	deletion
chrUn	5477443	5477597	mfCnv1896	ENSGACG00000001553	noncoding	no	freshGreaterThanMarine	deletion
chrUn	5484243	5484359	mfCnv1897	ENSGACG00000001555	noncoding	no	freshGreaterThanMarine	deletion
chrUn	5491319	5491440	mfCnv1898	ENSGACG00000001557	noncoding	no	freshGreaterThanMarine	deletion
chrUn	5499501	5499569	mfCnv1899	ENSGACG00000001558	noncoding	no	freshGreaterThanMarine	deletion
chrUn	5501675	5501807	mfCnv1900	ENSGACG00000001558	noncoding	no	freshGreaterThanMarine	deletion
chrUn	5501936	5502123	mfCnv1901	ENSGACG00000001558	noncoding	no	freshGreaterThanMarine	deletion
chrUn	5508415	5508490	mfCnv1902	ENSGACG00000001561	noncoding	no	freshGreaterThanMarine	deletion
chrUn	5510422	5510657	mfCnv1903	ENSGACG00000001561	noncoding	no	freshGreaterThanMarine	deletion
chrUn	5510778	5510938	mfCnv1904	ENSGACG00000001561	noncoding	no	freshGreaterThanMarine	deletion
chrUn	5521958	5522020	mfCnv1905	ENSGACG00000001567	noncoding	no	freshGreaterThanMarine	deletion
chrUn	5523319	5523422	mfCnv1906	ENSGACG00000001567	noncoding	no	freshGreaterThanMarine	deletion
chrUn	5530015	5530091	mfCnv1907	ENSGACG00000001567	noncoding	no	freshGreaterThanMarine	deletion
chrUn	5539104	5539157	mfCnv1908	ENSGACG00000001567	noncoding	no	freshGreaterThanMarine	deletion
chrUn	5542611	5542668	mfCnv1909	ENSGACG00000001567	noncoding	no	freshGreaterThanMarine	deletion
chrUn	5545040	5545189	mfCnv1910	ENSGACG00000001567	noncoding	no	freshGreaterThanMarine	deletion
chrUn	5545408	5545617	mfCnv1911	ENSGACG00000001567	noncoding	no	freshGreaterThanMarine	deletion
chrUn	5546478	5546724	mfCnv1912	ENSGACG00000001567	noncoding	no	freshGreaterThanMarine	deletion
chrUn	5550219	5550321	mfCnv1913	ENSGACG00000001567	noncoding	no	freshGreaterThanMarine	deletion
chrUn	5553438	5553815	mfCnv1914	ENSGACG00000001567	noncoding	no	freshGreaterThanMarine	deletion
chrUn	5554988	5555211	mfCnv1915	ENSGACG00000001567	noncoding	no	freshGreaterThanMarine	deletion
chrUn	5555556	5555694	mfCnv1916	ENSGACG00000001567	noncoding	no	freshGreaterThanMarine	deletion
chrUn	5556169	5556297	mfCnv1917	ENSGACG00000001567	noncoding	no	freshGreaterThanMarine	deletion
chrUn	5556507	5557132	mfCnv1918	ENSGACG00000001567	noncoding	no	freshGreaterThanMarine	deletion
chrUn	5558076	5558235	mfCnv1919	ENSGACG00000001567	noncoding	no	freshGreaterThanMarine	deletion
chrUn	5559238	5559373	mfCnv1920	ENSGACG00000001567	noncoding	no	freshGreaterThanMarine	deletion
chrUn	5560129	5560367	mfCnv1921	ENSGACG00000001567	noncoding	no	freshGreaterThanMarine	deletion
chrUn	5560413	5560482	mfCnv1922	ENSGACG00000001567	noncoding	no	freshGreaterThanMarine	deletion
chrUn	5561257	5561481	mfCnv1923	ENSGACG00000001567	noncoding	no	freshGreaterThanMarine	deletion
chrUn	5563618	5563719	mfCnv1924	ENSGACG00000001567	noncoding	no	freshGreaterThanMarine	deletion
chrUn	5574582	5574663	mfCnv1925	ENSGACG00000001567	noncoding	no	freshGreaterThanMarine	both
chrUn	5577974	5578413	mfCnv1926	ENSGACG00000001567	noncoding	no	freshGreaterThanMarine	deletion
chrUn	5585428	5585547	mfCnv1927	ENSGACG00000001567	noncoding	no	freshGreaterThanMarine	deletion
chrUn	5589968	5590059	mfCnv1928	ENSGACG00000001567	noncoding	no	freshGreaterThanMarine	deletion
chrUn	5599594	5600151	mfCnv1929	ENSGACG00000001567	noncoding	no	freshGreaterThanMarine	deletion
chrUn	5600219	5600447	mfCnv1930	ENSGACG00000001567	noncoding	no	freshGreaterThanMarine	deletion
chrUn	5601444	5601620	mfCnv1931	ENSGACG00000001567	noncoding	no	freshGreaterThanMarine	deletion
chrUn	5602356	5602720	mfCnv1932	ENSGACG00000001567	noncoding	no	freshGreaterThanMarine	deletion
chrUn	5606893	5607124	mfCnv1933	ENSGACG00000001573	noncoding	no	freshGreaterThanMarine	deletion
chrUn	5607264	5607359	mfCnv1934	ENSGACG00000001573	noncoding	no	freshGreaterThanMarine	deletion
chrUn	5635545	5635744	mfCnv1935	ENSGACG00000001586	noncoding	no	freshGreaterThanMarine	deletion
chrUn	5641530	5641728	mfCnv1936	ENSGACG00000001586	noncoding	no	freshGreaterThanMarine	deletion
chrUn	5642375	5642517	mfCnv1937	ENSGACG00000001586	noncoding	no	freshGreaterThanMarine	deletion
chrUn	5643685	5644300	mfCnv1938	ENSGACG00000001586	ENSGACG00000000873	no	freshGreaterThanMarine	deletion
chrUn	5647280	5647379	mfCnv1939	ENSGACG00000001586	noncoding	no	freshGreaterThanMarine	deletion
chrUn	5651153	5652372	mfCnv1940	ENSGACG00000001586	noncoding	no	freshGreaterThanMarine	deletion
chrUn	5653439	5654647	mfCnv1941	ENSGACG00000001586	noncoding	no	freshGreaterThanMarine	deletion
chrUn	5655052	5655140	mfCnv1942	ENSGACG00000001586	noncoding	no	freshGreaterThanMarine	both
chrUn	5655452	5655975	mfCnv1943	ENSGACG00000001586	noncoding	no	freshGreaterThanMarine	deletion
chrUn	5657994	5658049	mfCnv1944	ENSGACG00000001586	noncoding	no	freshGreaterThanMarine	deletion
chrUn	5658296	5658924	mfCnv1945	ENSGACG00000001586	noncoding	no	freshGreaterThanMarine	deletion
chrUn	5660385	5660454	mfCnv1946	ENSGACG00000001586	noncoding	no	freshGreaterThanMarine	deletion
chrUn	5662190	5662365	mfCnv1947	ENSGACG00000001588	noncoding	no	freshGreaterThanMarine	deletion
chrUn	5668116	5668291	mfCnv1948	ENSGACG00000001589	noncoding	no	freshGreaterThanMarine	deletion
chrUn	5668538	5668839	mfCnv1949	ENSGACG00000001589	noncoding	no	freshGreaterThanMarine	deletion
chrUn	5669553	5670634	mfCnv1950	ENSGACG00000001589	noncoding	no	freshGreaterThanMarine	deletion
chrUn	5704844	5705284	mfCnv1951	ENSGACG00000001610	noncoding	no	freshGreaterThanMarine	deletion
chrUn	5705784	5705872	mfCnv1952	ENSGACG00000001610	noncoding	no	freshGreaterThanMarine	deletion
chrUn	5706179	5706353	mfCnv1953	ENSGACG00000001610	noncoding	no	freshGreaterThanMarine	deletion
chrUn	5706526	5706655	mfCnv1954	ENSGACG00000001610	noncoding	no	freshGreaterThanMarine	deletion
chrUn	5707107	5707609	mfCnv1955	ENSGACG00000001610	noncoding	no	freshGreaterThanMarine	deletion
chrUn	5707784	5707839	mfCnv1956	ENSGACG00000001610	noncoding	no	freshGreaterThanMarine	deletion
chrUn	5708088	5708235	mfCnv1957	ENSGACG00000001610	noncoding	no	freshGreaterThanMarine	deletion
chrUn	5713265	5713420	mfCnv1958	ENSGACG00000001610	noncoding	no	freshGreaterThanMarine	deletion
chrUn	5713627	5713767	mfCnv1959	ENSGACG00000001610	noncoding	no	freshGreaterThanMarine	deletion
chrUn	5769954	5770055	mfCnv1960	ENSGACG00000001643	noncoding	no	freshGreaterThanMarine	deletion
chrUn	5836530	5836577	mfCnv1961	ENSGACG00000001665	noncoding	no	freshGreaterThanMarine	deletion
chrUn	5939435	5940071	mfCnv1962	ENSGACG00000001693	noncoding	no	marineGreaterThanFresh	both
chrUn	5940171	5940384	mfCnv1963	ENSGACG00000001693	noncoding	no	marineGreaterThanFresh	deletion
chrUn	6043961	6044392	mfCnv1964	ENSGACG00000001703	noncoding	no	freshGreaterThanMarine	deletion
chrUn	6047919	6048081	mfCnv1965	ENSGACG00000001703	noncoding	no	freshGreaterThanMarine	deletion
chrUn	6048244	6048688	mfCnv1966	ENSGACG00000001703	noncoding	no	freshGreaterThanMarine	deletion
chrUn	6049645	6049855	mfCnv1967	ENSGACG00000001703	noncoding	no	freshGreaterThanMarine	deletion
chrUn	6049954	6050072	mfCnv1968	ENSGACG00000001703	noncoding	no	freshGreaterThanMarine	deletion
chrUn	6053408	6053906	mfCnv1969	ENSGACG00000001703	noncoding	no	freshGreaterThanMarine	deletion
chrUn	6061247	6061373	mfCnv1970	ENSGACG00000001703	noncoding	no	freshGreaterThanMarine	deletion
chrUn	6062913	6063288	mfCnv1971	ENSGACG00000001703	noncoding	no	freshGreaterThanMarine	deletion
chrUn	6063429	6063506	mfCnv1972	ENSGACG00000001703	noncoding	no	freshGreaterThanMarine	deletion
chrUn	6064156	6064251	mfCnv1973	ENSGACG00000001703	noncoding	no	freshGreaterThanMarine	deletion
chrUn	6064717	6065629	mfCnv1974	ENSGACG00000001703	noncoding	no	freshGreaterThanMarine	deletion
chrUn	6065801	6066088	mfCnv1975	ENSGACG00000001703	noncoding	no	freshGreaterThanMarine	deletion
chrUn	6066722	6066993	mfCnv1976	ENSGACG00000001703	noncoding	no	freshGreaterThanMarine	deletion
chrUn	6067029	6067374	mfCnv1977	ENSGACG00000001703	noncoding	no	freshGreaterThanMarine	deletion
chrUn	6068610	6068703	mfCnv1978	ENSGACG00000001703	noncoding	no	freshGreaterThanMarine	deletion
chrUn	6068871	6069129	mfCnv1979	ENSGACG00000001703	noncoding	no	freshGreaterThanMarine	deletion
chrUn	6070514	6070749	mfCnv1980	ENSGACG00000001703	noncoding	no	freshGreaterThanMarine	deletion
chrUn	6147773	6147845	mfCnv1981	ENSGACG00000000861	noncoding	no	freshGreaterThanMarine	deletion
chrUn	6319227	6319718	mfCnv1982	ENSGACG00000000861	noncoding	no	marineGreaterThanFresh	deletion
chrUn	6345122	6345547	mfCnv1983	ENSGACG00000000861	noncoding	no	marineGreaterThanFresh	deletion
chrUn	6446210	6446339	mfCnv1984	ENSGACG00000000871	noncoding	no	freshGreaterThanMarine	deletion
chrUn	6458721	6458865	mfCnv1985	ENSGACG00000000871	noncoding	no	freshGreaterThanMarine	deletion
chrUn	6481812	6481889	mfCnv1986	ENSGACG00000000871	noncoding	no	freshGreaterThanMarine	deletion
chrUn	6513364	6513447	mfCnv1987	ENSGACG00000000871	noncoding	no	freshGreaterThanMarine	deletion
chrUn	6515030	6515348	mfCnv1988	ENSGACG00000000871	noncoding	no	freshGreaterThanMarine	deletion
chrUn	6515449	6515518	mfCnv1989	ENSGACG00000000871	noncoding	no	freshGreaterThanMarine	deletion
chrUn	6517890	6517981	mfCnv1990	ENSGACG00000000871	noncoding	no	freshGreaterThanMarine	deletion
chrUn	6518849	6518948	mfCnv1991	ENSGACG00000000871	noncoding	no	freshGreaterThanMarine	deletion
chrUn	6553740	6553852	mfCnv1992	ENSGACG00000000871	noncoding	no	freshGreaterThanMarine	deletion
chrUn	6554777	6554951	mfCnv1993	ENSGACG00000000871	noncoding	no	freshGreaterThanMarine	deletion
chrUn	6558977	6559064	mfCnv1994	ENSGACG00000000871	noncoding	no	freshGreaterThanMarine	deletion
chrUn	6559183	6559324	mfCnv1995	ENSGACG00000000871	noncoding	no	freshGreaterThanMarine	deletion
chrUn	6560776	6560856	mfCnv1996	ENSGACG00000000871	noncoding	no	freshGreaterThanMarine	deletion
chrUn	6561017	6561080	mfCnv1997	ENSGACG00000000871	noncoding	no	freshGreaterThanMarine	deletion
chrUn	6564983	6565043	mfCnv1998	ENSGACG00000000871	noncoding	no	freshGreaterThanMarine	deletion
chrUn	6566141	6566378	mfCnv1999	ENSGACG00000000871	noncoding	no	freshGreaterThanMarine	deletion
[truncated: 4,665 more rows]

## Sheet: tableS5_proteinCodingDels
Ensembl ID	Related Symbol	Ecotype with higher copy number
ENSGACG00000010678	ACSF2	fresh
ENSGACG00000014701	ADAMTSL2	fresh
ENSGACG00000014379	ADAMTSL3	marine
ENSGACG00000020327	AIFM1	fresh
ENSGACG00000013378	ALKBH1	marine
ENSGACG00000008819	APCS	fresh
ENSGACG00000014556	APOL4	fresh
ENSGACG00000010804	ARHGAP44	marine
ENSGACG00000004374	ARHGEF28	marine
ENSGACG00000014691	ART5	fresh
ENSGACG00000014420	ASTL	fresh
ENSGACG00000002968	ATP2C1	marine
ENSGACG00000019282	B2M	fresh
ENSGACG00000018848	C3	fresh
ENSGACG00000002008	CACNG6A	marine
ENSGACG00000001335	CCR1	fresh
ENSGACG00000008301	CD209	fresh
ENSGACG00000004982	CDK13	fresh
ENSGACG00000018130	CEL	fresh
ENSGACG00000005883	CFH	fresh
ENSGACG00000014567	CLEC4C	fresh
ENSGACG00000007065	COL14A1	marine
ENSGACG00000018098	COL23A1	fresh
ENSGACG00000000833	COL7A1	marine
ENSGACG00000017590	CREMA	marine
ENSGACG00000008828	CRP	fresh
ENSGACG00000016669	CYP3A65	marine
ENSGACG00000016295	DDIAS	fresh
ENSGACG00000008925	DENND3	marine
ENSGACG00000015574	DESMB	fresh
ENSGACG00000012250	DLK2	marine
ENSGACG00000018358	DOK7	fresh
ENSGACG00000013124	EPB41L2	marine
ENSGACG00000018984	EPM2AIP1	fresh
ENSGACG00000002144	FAM160A2	both
ENSGACG00000018964	FBLN1	fresh
ENSGACG00000008686	FCER1A	fresh
ENSGACG00000020878	FNIP1	marine
ENSGACG00000019835	FUT9	fresh
ENSGACG00000014246	G2E3	fresh
ENSGACG00000018725	GAPDH	marine
ENSGACG00000013107	GIMAP4	fresh
ENSGACG00000018058	GIMAP4	fresh
ENSGACG00000001202	GIMAP7	fresh
ENSGACG00000018973	GIMAP7	fresh
ENSGACG00000018976	GIMAP7	fresh
ENSGACG00000018977	GIMAP7	fresh
ENSGACG00000018978	GIMAP7	fresh
ENSGACG00000018003	GIMAP8	fresh
ENSGACG00000005246	GPX7	fresh
ENSGACG00000009862	GRIK5	marine
ENSGACG00000005458	GTF2IRD2B	fresh
ENSGACG00000017700	GTF2IRD2B	marine
ENSGACG00000012617	GTPBP1	fresh
ENSGACG00000001976	HLA-B	fresh
ENSGACG00000000344	HLA-DPA1	fresh
ENSGACG00000020238	HPDA	marine
ENSGACG00000003113	HTR3A	marine
ENSGACG00000006713	IFI27	marine
ENSGACG00000009508	IGKV6D-21	fresh
ENSGACG00000016298	IL4R	fresh
ENSGACG00000014296	INHA	fresh
ENSGACG00000007750	ITGAM	fresh
ENSGACG00000007288	IVNS1ABPB	fresh
ENSGACG00000019033	KIF21A	fresh
ENSGACG00000012935	KLK13	fresh
ENSGACG00000020303	KSR1	fresh
ENSGACG00000012609	LGALS1	fresh
ENSGACG00000019115	LRIG3	fresh
ENSGACG00000001705	MAG	fresh
ENSGACG00000020200	MAP6A	fresh
ENSGACG00000020145	MMP13A	fresh
ENSGACG00000017073	MPPED2A	marine
ENSGACG00000001910	MR1	fresh
ENSGACG00000001913	MR1	fresh
ENSGACG00000001919	MR1	fresh
ENSGACG00000001978	MR1	fresh
ENSGACG00000014758	MRC1L1	fresh
ENSGACG00000019063	MUC19	fresh
ENSGACG00000014095	MUC5AC	fresh
ENSGACG00000018748	MXRA5	fresh
ENSGACG00000002902	MYH1	fresh
ENSGACG00000002933	MYH1	fresh
ENSGACG00000002955	MYH1	fresh
ENSGACG00000003003	MYH1	fresh
ENSGACG00000005438	MYO1C	marine
ENSGACG00000016365	NFATC3	fresh
ENSGACG00000000935	NLRC3	fresh
ENSGACG00000002886	NLRC5	fresh
ENSGACG00000010445	NLRP3	fresh
ENSGACG00000012027	NLRP3	fresh
ENSGACG00000013520	NLRP3	marine
ENSGACG00000010362	NPR1A	marine
ENSGACG00000003786	NSFB	marine
ENSGACG00000005821	OR101-1	marine
ENSGACG00000006948	OR10C1	fresh
ENSGACG00000002214	OR13C4	marine
ENSGACG00000014854	OR2G6	marine
ENSGACG00000002212	OR51E1	marine
ENSGACG00000006971	OR52D1	fresh
ENSGACG00000002215	OR7C1	marine
ENSGACG00000005437	ORC1	fresh
ENSGACG00000002512	PDIA4	fresh
ENSGACG00000005694	PSMC6	fresh
ENSGACG00000011025	PTPN22	marine
ENSGACG00000019636	RNF39	fresh
ENSGACG00000003709	RYK	marine
ENSGACG00000014964	SCTR	fresh
ENSGACG00000002670	SEMA5A	fresh
ENSGACG00000005513	SERPINB1	fresh
ENSGACG00000005532	SERPINB1	fresh
ENSGACG00000005748	SESN2	marine
ENSGACG00000006248	SI:CH73-265H17.4	fresh
ENSGACG00000007546	SI:CH73-380L3.1	fresh
ENSGACG00000002005	SI:DKEY-14O18.2	marine
ENSGACG00000000122	SI:DKEY-187K19.2	fresh
ENSGACG00000000873	SI:DKEY-225N22.4	fresh
ENSGACG00000017688	SLAMF6	fresh
ENSGACG00000002255	SLC16A5	marine
ENSGACG00000017837	SLC43A3B	fresh
ENSGACG00000010917	SLC47A1	fresh
ENSGACG00000019037	SPG1	fresh
ENSGACG00000019061	SPG4	fresh
ENSGACG00000010298	SRMS	fresh
ENSGACG00000000238	ST3GAL1	marine
ENSGACG00000000240	ST3GAL1	marine
ENSGACG00000008831	ST3GAL1	fresh
ENSGACG00000009269	ST8SIA6	marine
ENSGACG00000014289	STK11IP	fresh
ENSGACG00000008551	TAAR15	fresh
ENSGACG00000006525	TAS1R1	fresh
ENSGACG00000006534	TAS1R1	fresh
ENSGACG00000006536	TAS1R1	fresh
ENSGACG00000003766	THRA	fresh
ENSGACG00000006690	TNFRSF11B	fresh
ENSGACG00000009659	TNFRSF11B	marine
ENSGACG00000014268	TNS1	fresh
ENSGACG00000008869	TRIM21	marine
ENSGACG00000018850	TRIM39	fresh
ENSGACG00000019635	TRIM39	fresh
ENSGACG00000007901	TRPM4	fresh
ENSGACG00000000321	TTC28	fresh
ENSGACG00000014413	TTPA	marine
ENSGACG00000000018	UNKNOWN	marine
ENSGACG00000002712	UNKNOWN	fresh
ENSGACG00000006861	UNKNOWN	marine
ENSGACG00000007079	UNKNOWN	fresh
ENSGACG00000008242	UNKNOWN	marine
ENSGACG00000008250	UNKNOWN	fresh
ENSGACG00000008253	UNKNOWN	marine
ENSGACG00000009919	UNKNOWN	fresh
ENSGACG00000009920	UNKNOWN	fresh
ENSGACG00000012133	UNKNOWN	fresh
ENSGACG00000012441	UNKNOWN	marine
ENSGACG00000012456	UNKNOWN	marine
ENSGACG00000013125	UNKNOWN	fresh
ENSGACG00000014371	UNKNOWN	fresh
ENSGACG00000015045	UNKNOWN	marine
ENSGACG00000018849	UNKNOWN	fresh
ENSGACG00000018947	UNKNOWN	fresh
ENSGACG00000019210	UNKNOWN	fresh
ENSGACG00000007447	URGCP	marine
ENSGACG00000007451	URGCP	fresh
ENSGACG00000007454	URGCP	fresh
ENSGACG00000007511	URGCP	fresh
ENSGACG00000005496	USP22	marine
ENSGACG00000020304	VEZF1A	fresh
ENSGACG00000001107	VWA5A	fresh
ENSGACG00000006236	VWA5A	fresh
ENSGACG00000006254	VWA5A	fresh
ENSGACG00000012505	XRCC1	fresh
ENSGACG00000000704	ZAN	fresh
ENSGACG00000008377	ZGC:113411	fresh
ENSGACG00000020063	ZGC:158564	fresh
ENSGACG00000014022	ZGC:171759	marine
ENSGACG00000002254	ZMYM1	marine
ENSGACG00000020225	ZZEF1	fresh

## Sheet: tableS6_proteinCodingDups
Ensembl ID	Related Symbol	Ecotype with higher copy number
ENSGACG00000005067	A2ML1	marine
ENSGACG00000017484	ANXA3B	fresh
ENSGACG00000014553	APOL3	fresh
ENSGACG00000014556	APOL4	fresh
ENSGACG00000012565	C19orf12	marine
ENSGACG00000003379	C19orf44	marine
ENSGACG00000018765	CASP3B	marine
ENSGACG00000008301	CD209	fresh
ENSGACG00000011122	CDKN2C	marine
ENSGACG00000014567	CLEC4C	fresh
ENSGACG00000008534	CLEC4E	fresh
ENSGACG00000007065	COL14A1	marine
ENSGACG00000017590	CREMA	marine
ENSGACG00000011268	CYP2W1	marine
ENSGACG00000009676	DNASE2	marine
ENSGACG00000018690	EPS8L2	fresh
ENSGACG00000006916	EXT1	fresh
ENSGACG00000005442	FADS2	fresh
ENSGACG00000000537	GBGT1	marine
ENSGACG00000005246	GPX7	fresh
ENSGACG00000017700	GTF2IRD2B	marine
ENSGACG00000017481	GTPBP4	marine
ENSGACG00000005313	HSPB9	marine
ENSGACG00000006713	IFI27	marine
ENSGACG00000007750	ITGAM	fresh
ENSGACG00000004168	KRIT1	marine
ENSGACG00000002240	LCT	marine
ENSGACG00000015099	LSM14B	fresh
ENSGACG00000001919	MR1	fresh
ENSGACG00000014095	MUC5AC	fresh
ENSGACG00000002902	MYH1	fresh
ENSGACG00000002933	MYH1	fresh
ENSGACG00000002955	MYH1	fresh
ENSGACG00000003003	MYH1	fresh
ENSGACG00000003122	NOP16	marine
ENSGACG00000019508	NXPE3	marine
ENSGACG00000002215	OR7C1	marine
ENSGACG00000005694	PSMC6	fresh
ENSGACG00000003709	RYK	fresh
ENSGACG00000005748	SESN2	marine
ENSGACG00000009610	SI:CH211-195M9.3	fresh
ENSGACG00000006248	SI:CH73-265H17.4	fresh
ENSGACG00000014699	SI:DKEYP-70F9.7	marine
ENSGACG00000004193	SI:RP71-17I16.5	marine
ENSGACG00000002255	SLC16A5	marine
ENSGACG00000004577	SPIRE1	marine
ENSGACG00000018944	SSTR5	marine
ENSGACG00000008831	ST3GAL1	fresh
ENSGACG00000014547	SULT3ST1	fresh
ENSGACG00000008305	TAAR15	marine
ENSGACG00000006534	TAS1R1	fresh
ENSGACG00000014526	TPCN2	marine
ENSGACG00000018850	TRIM39	fresh
ENSGACG00000006882	TRIM67	fresh
ENSGACG00000003374	Unknown	marine
ENSGACG00000006048	Unknown	marine
ENSGACG00000008242	Unknown	marine
ENSGACG00000008250	Unknown	marine
ENSGACG00000008253	Unknown	marine
ENSGACG00000008825	Unknown	marine
ENSGACG00000009919	Unknown	fresh
ENSGACG00000009920	Unknown	fresh
ENSGACG00000012441	Unknown	marine
ENSGACG00000012456	Unknown	marine
ENSGACG00000015045	Unknown	marine
ENSGACG00000018849	Unknown	fresh
ENSGACG00000001107	VWA5A	fresh
ENSGACG00000006236	VWA5A	fresh
ENSGACG00000006254	VWA5A	fresh
ENSGACG00000000704	ZAN	fresh
ENSGACG00000008377	ZGC:113411	fresh
ENSGACG00000002251	ZMYM1	marine

## Sheet: tableS7_proteinCodingDelEnrichm
Gene Ontology ID	P-value (corrected)	Gene Ontology Term	Genes contributing to enrichment
GO:0050778	8.31688e-09	positive regulation of immune response	ENSGACG00000016298,ENSGACG00000003003,ENSGACG00000002955,ENSGACG00000002933,ENSGACG00000002902,ENSGACG00000001978,ENSGACG00000001976,ENSGACG00000001919,ENSGACG00000001913,ENSGACG00000001910,ENSGACG00000001335,ENSGACG00000000344,ENSGACG00000000122,ENSGACG00000019282
GO:0002822	6.41289e-08	regulation of adaptive immune response based on somatic recombination of immune receptors built from immunoglobulin superfamily domains	ENSGACG00000016298,ENSGACG00000001978,ENSGACG00000001976,ENSGACG00000001919,ENSGACG00000001913,ENSGACG00000001910,ENSGACG00000007901,ENSGACG00000001335,ENSGACG00000000122,ENSGACG00000019282
GO:0050776	9.01346e-08	regulation of immune response	ENSGACG00000016298,ENSGACG00000003003,ENSGACG00000002955,ENSGACG00000002933,ENSGACG00000002902,ENSGACG00000001978,ENSGACG00000001976,ENSGACG00000001919,ENSGACG00000001913,ENSGACG00000001910,ENSGACG00000007901,ENSGACG00000001335,ENSGACG00000000344,ENSGACG00000000122,ENSGACG00000019282
GO:0002819	1.53713e-07	regulation of adaptive immune response	ENSGACG00000016298,ENSGACG00000001978,ENSGACG00000001976,ENSGACG00000001919,ENSGACG00000001913,ENSGACG00000001910,ENSGACG00000007901,ENSGACG00000001335,ENSGACG00000000122,ENSGACG00000019282
GO:0042612	3.41117e-07	MHC class I protein complex	ENSGACG00000019282,ENSGACG00000001978,ENSGACG00000001976,ENSGACG00000001919,ENSGACG00000001913,ENSGACG00000001910,ENSGACG00000000344,ENSGACG00000000122
GO:0002684	1.27531e-06	positive regulation of immune system process	ENSGACG00000016298,ENSGACG00000003003,ENSGACG00000002955,ENSGACG00000002933,ENSGACG00000002902,ENSGACG00000001978,ENSGACG00000001976,ENSGACG00000001919,ENSGACG00000001913,ENSGACG00000001910,ENSGACG00000001335,ENSGACG00000000344,ENSGACG00000000122,ENSGACG00000019282
GO:0002682	1.43674e-06	regulation of immune system process	ENSGACG00000014296,ENSGACG00000003003,ENSGACG00000002955,ENSGACG00000002933,ENSGACG00000002902,ENSGACG00000001978,ENSGACG00000001976,ENSGACG00000001919,ENSGACG00000001913,ENSGACG00000001910,ENSGACG00000007901,ENSGACG00000001335,ENSGACG00000000344,ENSGACG00000000122,ENSGACG00000019282,ENSGACG00000016298
GO:0042611	2.19915e-06	MHC protein complex	ENSGACG00000019282,ENSGACG00000001978,ENSGACG00000001976,ENSGACG00000001919,ENSGACG00000001913,ENSGACG00000001910,ENSGACG00000000344,ENSGACG00000000122
GO:0042605	2.88198e-06	peptide antigen binding	ENSGACG00000019282,ENSGACG00000001978,ENSGACG00000001976,ENSGACG00000001919,ENSGACG00000001913,ENSGACG00000001910,ENSGACG00000000344,ENSGACG00000000122
GO:0002709	2.88198e-06	regulation of T cell mediated immunity	ENSGACG00000019282,ENSGACG00000001978,ENSGACG00000001976,ENSGACG00000001919,ENSGACG00000001913,ENSGACG00000001910,ENSGACG00000007901,ENSGACG00000000122
GO:0002474	3.7416e-06	antigen processing and presentation of peptide antigen via MHC class I	ENSGACG00000019282,ENSGACG00000001978,ENSGACG00000001976,ENSGACG00000001919,ENSGACG00000001913,ENSGACG00000001910,ENSGACG00000000344,ENSGACG00000000122
GO:0002699	4.52248e-06	positive regulation of immune effector process	ENSGACG00000016298,ENSGACG00000001978,ENSGACG00000001976,ENSGACG00000001919,ENSGACG00000001913,ENSGACG00000001910,ENSGACG00000001335,ENSGACG00000000122,ENSGACG00000019282
GO:0048002	4.81529e-06	antigen processing and presentation of peptide antigen	ENSGACG00000019282,ENSGACG00000001978,ENSGACG00000001976,ENSGACG00000001919,ENSGACG00000001913,ENSGACG00000001910,ENSGACG00000000344,ENSGACG00000000122
GO:0048584	6.93636e-06	positive regulation of response to stimulus	ENSGACG00000014296,ENSGACG00000003003,ENSGACG00000002955,ENSGACG00000002933,ENSGACG00000002902,ENSGACG00000001978,ENSGACG00000001976,ENSGACG00000001919,ENSGACG00000001913,ENSGACG00000001910,ENSGACG00000020145,ENSGACG00000001335,ENSGACG00000000344,ENSGACG00000000122,ENSGACG00000019282,ENSGACG00000016298
GO:0002703	7.73503e-06	regulation of leukocyte mediated immunity	ENSGACG00000019282,ENSGACG00000001978,ENSGACG00000001976,ENSGACG00000001919,ENSGACG00000001913,ENSGACG00000001910,ENSGACG00000007901,ENSGACG00000001335,ENSGACG00000000122
GO:0002706	1.51759e-05	regulation of lymphocyte mediated immunity	ENSGACG00000019282,ENSGACG00000001978,ENSGACG00000001976,ENSGACG00000001919,ENSGACG00000001913,ENSGACG00000001910,ENSGACG00000007901,ENSGACG00000000122
GO:0002824	1.87191e-05	positive regulation of adaptive immune response based on somatic recombination of immune receptors built from immunoglobulin superfamily domains	ENSGACG00000019282,ENSGACG00000001978,ENSGACG00000001976,ENSGACG00000001919,ENSGACG00000001913,ENSGACG00000001910,ENSGACG00000001335,ENSGACG00000000122
GO:0001916	2.33954e-05	positive regulation of T cell mediated cytotoxicity	ENSGACG00000019282,ENSGACG00000001978,ENSGACG00000001976,ENSGACG00000001919,ENSGACG00000001913,ENSGACG00000001910,ENSGACG00000000122
GO:0002711	3.09709e-05	positive regulation of T cell mediated immunity	ENSGACG00000019282,ENSGACG00000001978,ENSGACG00000001976,ENSGACG00000001919,ENSGACG00000001913,ENSGACG00000001910,ENSGACG00000000122
GO:0001914	3.09709e-05	regulation of T cell mediated cytotoxicity	ENSGACG00000019282,ENSGACG00000001978,ENSGACG00000001976,ENSGACG00000001919,ENSGACG00000001913,ENSGACG00000001910,ENSGACG00000000122
GO:0002821	4.10265e-05	positive regulation of adaptive immune response	ENSGACG00000019282,ENSGACG00000001978,ENSGACG00000001976,ENSGACG00000001919,ENSGACG00000001913,ENSGACG00000001910,ENSGACG00000001335,ENSGACG00000000122
GO:0002697	5.18272e-05	regulation of immune effector process	ENSGACG00000016298,ENSGACG00000001978,ENSGACG00000001976,ENSGACG00000001919,ENSGACG00000001913,ENSGACG00000001910,ENSGACG00000007901,ENSGACG00000001335,ENSGACG00000000122,ENSGACG00000019282
GO:0001912	5.24919e-05	positive regulation of leukocyte mediated cytotoxicity	ENSGACG00000019282,ENSGACG00000001978,ENSGACG00000001976,ENSGACG00000001919,ENSGACG00000001913,ENSGACG00000001910,ENSGACG00000000122
GO:0031343	6.73175e-05	positive regulation of cell killing	ENSGACG00000019282,ENSGACG00000001978,ENSGACG00000001976,ENSGACG00000001919,ENSGACG00000001913,ENSGACG00000001910,ENSGACG00000000122
GO:0006955	0.000129557	immune response	ENSGACG00000019282,ENSGACG00000003003,ENSGACG00000002955,ENSGACG00000002933,ENSGACG00000002902,ENSGACG00000014691,ENSGACG00000008377,ENSGACG00000001978,ENSGACG00000001976,ENSGACG00000001919,ENSGACG00000001913,ENSGACG00000001910,ENSGACG00000012935,ENSGACG00000001335,ENSGACG00000000344,ENSGACG00000000122
GO:0002708	0.000167281	positive regulation of lymphocyte mediated immunity	ENSGACG00000019282,ENSGACG00000001978,ENSGACG00000001976,ENSGACG00000001919,ENSGACG00000001913,ENSGACG00000001910,ENSGACG00000000122
GO:0002376	0.000195073	immune system process	ENSGACG00000014296,ENSGACG00000003003,ENSGACG00000002955,ENSGACG00000002933,ENSGACG00000002902,ENSGACG00000014691,ENSGACG00000008377,ENSGACG00000001978,ENSGACG00000001976,ENSGACG00000001919,ENSGACG00000001913,ENSGACG00000001910,ENSGACG00000012935,ENSGACG00000020145,ENSGACG00000001335,ENSGACG00000000344,ENSGACG00000000122,ENSGACG00000019282
GO:0001910	0.000206175	regulation of leukocyte mediated cytotoxicity	ENSGACG00000019282,ENSGACG00000001978,ENSGACG00000001976,ENSGACG00000001919,ENSGACG00000001913,ENSGACG00000001910,ENSGACG00000000122
GO:0019882	0.00021559	antigen processing and presentation	ENSGACG00000019282,ENSGACG00000001978,ENSGACG00000001976,ENSGACG00000001919,ENSGACG00000001913,ENSGACG00000001910,ENSGACG00000000344,ENSGACG00000000122
GO:0031341	0.000252466	regulation of cell killing	ENSGACG00000019282,ENSGACG00000001978,ENSGACG00000001976,ENSGACG00000001919,ENSGACG00000001913,ENSGACG00000001910,ENSGACG00000000122
GO:0048741	0.000262512	skeletal muscle fiber development	ENSGACG00000002902,ENSGACG00000003003,ENSGACG00000002955,ENSGACG00000002933
GO:0014904	0.000262512	myotube cell development	ENSGACG00000002902,ENSGACG00000003003,ENSGACG00000002955,ENSGACG00000002933
GO:0007379	0.000262512	segment specification	ENSGACG00000002902,ENSGACG00000003003,ENSGACG00000002955,ENSGACG00000002933
GO:0001757	0.000262512	somite specification	ENSGACG00000002902,ENSGACG00000003003,ENSGACG00000002955,ENSGACG00000002933
GO:0003823	0.00038146	antigen binding	ENSGACG00000019282,ENSGACG00000001978,ENSGACG00000001976,ENSGACG00000001919,ENSGACG00000001913,ENSGACG00000001910,ENSGACG00000000344,ENSGACG00000000122
GO:0002705	0.000447451	positive regulation of leukocyte mediated immunity	ENSGACG00000019282,ENSGACG00000001978,ENSGACG00000001976,ENSGACG00000001919,ENSGACG00000001913,ENSGACG00000001910,ENSGACG00000000122
GO:0061053	0.000782254	somite development	ENSGACG00000002902,ENSGACG00000003003,ENSGACG00000002955,ENSGACG00000002933
GO:0001756	0.000782254	somitogenesis	ENSGACG00000002902,ENSGACG00000003003,ENSGACG00000002955,ENSGACG00000002933
GO:0048583	0.000942415	regulation of response to stimulus	ENSGACG00000014296,ENSGACG00000007065,ENSGACG00000003003,ENSGACG00000002955,ENSGACG00000002933,ENSGACG00000002902,ENSGACG00000008377,ENSGACG00000005748,ENSGACG00000001978,ENSGACG00000001976,ENSGACG00000001919,ENSGACG00000001913,ENSGACG00000001910,ENSGACG00000020145,ENSGACG00000007901,ENSGACG00000001335,ENSGACG00000000344,ENSGACG00000000122,ENSGACG00000019282,ENSGACG00000016298

## Sheet: tableS8_proteinCodingDupEnrichm
Gene Ontology ID	P-value (corrected)	Gene Ontology Term	Genes contributing to enrichment
GO:0048741	2.65503e-06	skeletal muscle fiber development	ENSGACG00000002902,ENSGACG00000003003,ENSGACG00000002955,ENSGACG00000002933
GO:0014904	2.65503e-06	myotube cell development	ENSGACG00000002902,ENSGACG00000003003,ENSGACG00000002955,ENSGACG00000002933
GO:0007379	2.65503e-06	segment specification	ENSGACG00000002902,ENSGACG00000003003,ENSGACG00000002955,ENSGACG00000002933
GO:0001757	2.65503e-06	somite specification	ENSGACG00000002902,ENSGACG00000003003,ENSGACG00000002955,ENSGACG00000002933
GO:0061053	7.94892e-06	somite development	ENSGACG00000002902,ENSGACG00000003003,ENSGACG00000002955,ENSGACG00000002933
GO:0001756	7.94892e-06	somitogenesis	ENSGACG00000002902,ENSGACG00000003003,ENSGACG00000002955,ENSGACG00000002933
GO:0035282	1.85098e-05	segmentation	ENSGACG00000002902,ENSGACG00000003003,ENSGACG00000002955,ENSGACG00000002933
GO:0070938	3.69445e-05	contractile ring	ENSGACG00000002902,ENSGACG00000003003,ENSGACG00000002955,ENSGACG00000002933
GO:0048747	3.69445e-05	muscle fiber development	ENSGACG00000002902,ENSGACG00000003003,ENSGACG00000002955,ENSGACG00000002933
GO:0032982	3.69445e-05	myosin filament	ENSGACG00000002902,ENSGACG00000003003,ENSGACG00000002955,ENSGACG00000002933
GO:0032027	3.69445e-05	myosin light chain binding	ENSGACG00000002902,ENSGACG00000003003,ENSGACG00000002955,ENSGACG00000002933
GO:0016460	3.69445e-05	myosin II complex	ENSGACG00000002902,ENSGACG00000003003,ENSGACG00000002955,ENSGACG00000002933
GO:0014902	3.69445e-05	myotube differentiation	ENSGACG00000002902,ENSGACG00000003003,ENSGACG00000002955,ENSGACG00000002933
GO:0005859	3.69445e-05	muscle myosin complex	ENSGACG00000002902,ENSGACG00000003003,ENSGACG00000002955,ENSGACG00000002933
GO:0005826	3.69445e-05	actomyosin contractile ring	ENSGACG00000002902,ENSGACG00000003003,ENSGACG00000002955,ENSGACG00000002933
GO:0000146	3.69445e-05	microfilament motor activity	ENSGACG00000002902,ENSGACG00000003003,ENSGACG00000002955,ENSGACG00000002933
GO:0070252	6.63652e-05	actin-mediated cell contraction	ENSGACG00000002902,ENSGACG00000003003,ENSGACG00000002955,ENSGACG00000002933
GO:0033275	6.63652e-05	actin-myosin filament sliding	ENSGACG00000002902,ENSGACG00000003003,ENSGACG00000002955,ENSGACG00000002933
GO:0031672	6.63652e-05	A band	ENSGACG00000002902,ENSGACG00000003003,ENSGACG00000002955,ENSGACG00000002933
GO:0031034	6.63652e-05	myosin filament assembly	ENSGACG00000002902,ENSGACG00000003003,ENSGACG00000002955,ENSGACG00000002933
GO:0031033	6.63652e-05	myosin filament organization	ENSGACG00000002902,ENSGACG00000003003,ENSGACG00000002955,ENSGACG00000002933
GO:0030049	6.63652e-05	muscle filament sliding	ENSGACG00000002902,ENSGACG00000003003,ENSGACG00000002955,ENSGACG00000002933
GO:0009880	6.63652e-05	embryonic pattern specification	ENSGACG00000002902,ENSGACG00000003003,ENSGACG00000002955,ENSGACG00000002933
GO:0008307	6.63652e-05	structural constituent of muscle	ENSGACG00000002902,ENSGACG00000003003,ENSGACG00000002955,ENSGACG00000002933
GO:0006200	6.63652e-05	obsolete ATP catabolic process	ENSGACG00000002902,ENSGACG00000003003,ENSGACG00000002955,ENSGACG00000002933
GO:0050881	0.000110384	musculoskeletal movement	ENSGACG00000002902,ENSGACG00000003003,ENSGACG00000002955,ENSGACG00000002933
GO:0050879	0.000110384	multicellular organismal movement	ENSGACG00000002902,ENSGACG00000003003,ENSGACG00000002955,ENSGACG00000002933
GO:0032155	0.000110384	cell division site part	ENSGACG00000002902,ENSGACG00000003003,ENSGACG00000002955,ENSGACG00000002933
GO:0032153	0.000110384	cell division site	ENSGACG00000002902,ENSGACG00000003003,ENSGACG00000002955,ENSGACG00000002933
GO:0003009	0.000110384	skeletal muscle contraction	ENSGACG00000002902,ENSGACG00000003003,ENSGACG00000002955,ENSGACG00000002933
GO:0001778	0.000110384	plasma membrane repair	ENSGACG00000002902,ENSGACG00000003003,ENSGACG00000002955,ENSGACG00000002933
GO:0060325	0.000173109	face morphogenesis	ENSGACG00000002902,ENSGACG00000003003,ENSGACG00000002955,ENSGACG00000002933
GO:0060324	0.000173109	face development	ENSGACG00000002902,ENSGACG00000003003,ENSGACG00000002955,ENSGACG00000002933
GO:0060323	0.000173109	head morphogenesis	ENSGACG00000002902,ENSGACG00000003003,ENSGACG00000002955,ENSGACG00000002933
GO:0030048	0.000173109	actin filament-based movement	ENSGACG00000002902,ENSGACG00000003003,ENSGACG00000002955,ENSGACG00000002933
GO:0060537	0.000257181	muscle tissue development	ENSGACG00000002902,ENSGACG00000007065,ENSGACG00000003003,ENSGACG00000002955,ENSGACG00000002933
GO:0014706	0.000257181	striated muscle tissue development	ENSGACG00000002902,ENSGACG00000007065,ENSGACG00000003003,ENSGACG00000002955,ENSGACG00000002933
GO:0045214	0.000259136	sarcomere organization	ENSGACG00000002902,ENSGACG00000003003,ENSGACG00000002955,ENSGACG00000002933
GO:0017022	0.000259136	myosin binding	ENSGACG00000002902,ENSGACG00000003003,ENSGACG00000002955,ENSGACG00000002933
GO:0014823	0.000259136	response to activity	ENSGACG00000002902,ENSGACG00000003003,ENSGACG00000002955,ENSGACG00000002933
GO:0005516	0.000259136	calmodulin binding	ENSGACG00000002902,ENSGACG00000003003,ENSGACG00000002955,ENSGACG00000002933
GO:0044291	0.000373548	cell-cell contact zone	ENSGACG00000002902,ENSGACG00000003003,ENSGACG00000002955,ENSGACG00000002933
GO:0038096	0.000373548	Fc-gamma receptor signaling pathway involved in phagocytosis	ENSGACG00000002902,ENSGACG00000003003,ENSGACG00000002955,ENSGACG00000002933
GO:0038094	0.000373548	Fc-gamma receptor signaling pathway	ENSGACG00000002902,ENSGACG00000003003,ENSGACG00000002955,ENSGACG00000002933
GO:0036464	0.000373548	cytoplasmic ribonucleoprotein granule	ENSGACG00000002902,ENSGACG00000003003,ENSGACG00000002955,ENSGACG00000002933
GO:0035770	0.000373548	ribonucleoprotein granule	ENSGACG00000002902,ENSGACG00000003003,ENSGACG00000002955,ENSGACG00000002933
GO:0014704	0.000373548	intercalated disc	ENSGACG00000002902,ENSGACG00000003003,ENSGACG00000002955,ENSGACG00000002933
GO:0007519	0.000373548	skeletal muscle tissue development	ENSGACG00000002902,ENSGACG00000003003,ENSGACG00000002955,ENSGACG00000002933
GO:0002433	0.000373548	immune response-regulating cell surface receptor signaling pathway involved in phagocytosis	ENSGACG00000002902,ENSGACG00000003003,ENSGACG00000002955,ENSGACG00000002933
GO:0002431	0.000373548	Fc receptor mediated stimulatory signaling pathway	ENSGACG00000002902,ENSGACG00000003003,ENSGACG00000002955,ENSGACG00000002933
GO:0060538	0.000521906	skeletal muscle organ development	ENSGACG00000002902,ENSGACG00000003003,ENSGACG00000002955,ENSGACG00000002933
GO:0010171	0.000521906	body morphogenesis	ENSGACG00000002902,ENSGACG00000003003,ENSGACG00000002955,ENSGACG00000002933
GO:0009952	0.000521906	anterior/posterior pattern specification	ENSGACG00000002902,ENSGACG00000003003,ENSGACG00000002955,ENSGACG00000002933
GO:0006941	0.000521906	striated muscle contraction	ENSGACG00000002902,ENSGACG00000003003,ENSGACG00000002955,ENSGACG00000002933
GO:0006936	0.000633172	muscle contraction	ENSGACG00000014526,ENSGACG00000003003,ENSGACG00000002955,ENSGACG00000002933,ENSGACG00000002902
GO:0035108	0.000945073	limb morphogenesis	ENSGACG00000002902,ENSGACG00000003003,ENSGACG00000002955,ENSGACG00000002933
GO:0030326	0.000945073	embryonic limb morphogenesis	ENSGACG00000002902,ENSGACG00000003003,ENSGACG00000002955,ENSGACG00000002933

## Sheet: tableS9_noncodingEnrichment
Gene Ontology ID	P-value (corrected)	Gene Ontology Term	Genes contributing to enrichment
GO:0002824	3.57321e-07	positive regulation of adaptive immune response based on somatic recombination of immune receptors built from immunoglobulin superfamily domains	ENSGACG00000010170,ENSGACG00000002708,ENSGACG00000002708,ENSGACG00000002708,ENSGACG00000006455,ENSGACG00000003582,ENSGACG00000014611,ENSGACG00000012783,ENSGACG00000001978,ENSGACG00000001976,ENSGACG00000001973,ENSGACG00000001941,ENSGACG00000001941,ENSGACG00000001937,ENSGACG00000001935,ENSGACG00000001935,ENSGACG00000001932,ENSGACG00000001932,ENSGACG00000001919,ENSGACG00000001913,ENSGACG00000001910,…
GO:0002821	3.85842e-07	positive regulation of adaptive immune response	ENSGACG00000010170,ENSGACG00000002708,ENSGACG00000002708,ENSGACG00000002708,ENSGACG00000012351,ENSGACG00000006455,ENSGACG00000003582,ENSGACG00000014611,ENSGACG00000012783,ENSGACG00000001978,ENSGACG00000001976,ENSGACG00000001973,ENSGACG00000001941,ENSGACG00000001941,ENSGACG00000001937,ENSGACG00000001935,ENSGACG00000001935,ENSGACG00000001932,ENSGACG00000001932,ENSGACG00000001919,ENSGACG00000001913,…
GO:0002699	4.09757e-07	positive regulation of immune effector process	ENSGACG00000010170,ENSGACG00000002708,ENSGACG00000002708,ENSGACG00000002708,ENSGACG00000006455,ENSGACG00000014611,ENSGACG00000012783,ENSGACG00000001978,ENSGACG00000001976,ENSGACG00000001973,ENSGACG00000001941,ENSGACG00000001941,ENSGACG00000001937,ENSGACG00000001935,ENSGACG00000001935,ENSGACG00000001932,ENSGACG00000001932,ENSGACG00000001919,ENSGACG00000001913,ENSGACG00000001910,ENSGACG00000001910,…
GO:0002697	1.17561e-06	regulation of immune effector process	ENSGACG00000010170,ENSGACG00000002708,ENSGACG00000002708,ENSGACG00000002708,ENSGACG00000012351,ENSGACG00000006455,ENSGACG00000014611,ENSGACG00000012783,ENSGACG00000001978,ENSGACG00000001976,ENSGACG00000001973,ENSGACG00000001941,ENSGACG00000001941,ENSGACG00000001937,ENSGACG00000001935,ENSGACG00000001935,ENSGACG00000001932,ENSGACG00000001932,ENSGACG00000001919,ENSGACG00000001913,ENSGACG00000001910,…
GO:0002703	1.29834e-06	regulation of leukocyte mediated immunity	ENSGACG00000010170,ENSGACG00000002708,ENSGACG00000002708,ENSGACG00000002708,ENSGACG00000006455,ENSGACG00000014611,ENSGACG00000012783,ENSGACG00000001978,ENSGACG00000001976,ENSGACG00000001973,ENSGACG00000001941,ENSGACG00000001941,ENSGACG00000001937,ENSGACG00000001935,ENSGACG00000001935,ENSGACG00000001932,ENSGACG00000001932,ENSGACG00000001919,ENSGACG00000001913,ENSGACG00000001910,ENSGACG00000001910,…
GO:0002822	1.60031e-06	regulation of adaptive immune response based on somatic recombination of immune receptors built from immunoglobulin superfamily domains	ENSGACG00000010170,ENSGACG00000002708,ENSGACG00000002708,ENSGACG00000002708,ENSGACG00000006455,ENSGACG00000003582,ENSGACG00000014611,ENSGACG00000012783,ENSGACG00000001978,ENSGACG00000001976,ENSGACG00000001973,ENSGACG00000001941,ENSGACG00000001941,ENSGACG00000001937,ENSGACG00000001935,ENSGACG00000001935,ENSGACG00000001932,ENSGACG00000001932,ENSGACG00000001919,ENSGACG00000001913,ENSGACG00000001910,…
GO:0002819	1.62046e-06	regulation of adaptive immune response	ENSGACG00000010170,ENSGACG00000002708,ENSGACG00000002708,ENSGACG00000002708,ENSGACG00000012351,ENSGACG00000006455,ENSGACG00000003582,ENSGACG00000014611,ENSGACG00000012783,ENSGACG00000001978,ENSGACG00000001976,ENSGACG00000001973,ENSGACG00000001941,ENSGACG00000001941,ENSGACG00000001937,ENSGACG00000001935,ENSGACG00000001935,ENSGACG00000001932,ENSGACG00000001932,ENSGACG00000001919,ENSGACG00000001913,…
GO:0050778	7.24328e-06	positive regulation of immune response	ENSGACG00000010170,ENSGACG00000002708,ENSGACG00000002708,ENSGACG00000002708,ENSGACG00000012351,ENSGACG00000006455,ENSGACG00000003820,ENSGACG00000003582,ENSGACG00000003003,ENSGACG00000002955,ENSGACG00000002933,ENSGACG00000002902,ENSGACG00000014611,ENSGACG00000012783,ENSGACG00000001978,ENSGACG00000001976,ENSGACG00000001973,ENSGACG00000001941,ENSGACG00000001941,ENSGACG00000001937,ENSGACG00000001935,…
GO:0004930	1.16649e-05	G-protein coupled receptor activity	ENSGACG00000004599,ENSGACG00000014218,ENSGACG00000010215,ENSGACG00000008943,ENSGACG00000008943,ENSGACG00000007493,ENSGACG00000006455,ENSGACG00000003006,ENSGACG00000003006,ENSGACG00000003006,ENSGACG00000012333,ENSGACG00000004287,ENSGACG00000004284,ENSGACG00000008561,ENSGACG00000008556,ENSGACG00000008556,ENSGACG00000008554,ENSGACG00000008551,ENSGACG00000008547,ENSGACG00000008540,ENSGACG00000008324,…
GO:0002708	3.04013e-05	positive regulation of lymphocyte mediated immunity	ENSGACG00000010170,ENSGACG00000002708,ENSGACG00000002708,ENSGACG00000002708,ENSGACG00000014611,ENSGACG00000012783,ENSGACG00000001978,ENSGACG00000001976,ENSGACG00000001973,ENSGACG00000001941,ENSGACG00000001941,ENSGACG00000001937,ENSGACG00000001935,ENSGACG00000001935,ENSGACG00000001932,ENSGACG00000001932,ENSGACG00000001919,ENSGACG00000001913,ENSGACG00000001910,ENSGACG00000001910,ENSGACG00000020455,…
GO:0002705	3.17009e-05	positive regulation of leukocyte mediated immunity	ENSGACG00000010170,ENSGACG00000002708,ENSGACG00000002708,ENSGACG00000002708,ENSGACG00000014611,ENSGACG00000012783,ENSGACG00000001978,ENSGACG00000001976,ENSGACG00000001973,ENSGACG00000001941,ENSGACG00000001941,ENSGACG00000001937,ENSGACG00000001935,ENSGACG00000001935,ENSGACG00000001932,ENSGACG00000001932,ENSGACG00000001919,ENSGACG00000001913,ENSGACG00000001910,ENSGACG00000001910,ENSGACG00000020455,…
GO:0001912	6.03126e-05	positive regulation of leukocyte mediated cytotoxicity	ENSGACG00000010170,ENSGACG00000002708,ENSGACG00000002708,ENSGACG00000002708,ENSGACG00000001978,ENSGACG00000001976,ENSGACG00000001973,ENSGACG00000001941,ENSGACG00000001941,ENSGACG00000001937,ENSGACG00000001935,ENSGACG00000001935,ENSGACG00000001932,ENSGACG00000001932,ENSGACG00000001919,ENSGACG00000001913,ENSGACG00000001910,ENSGACG00000001910,ENSGACG00000020455,ENSGACG00000020069,ENSGACG00000002179,…
GO:0006955	7.60498e-05	immune response	ENSGACG00000010170,ENSGACG00000012473,ENSGACG00000012351,ENSGACG00000009412,ENSGACG00000006455,ENSGACG00000010950,ENSGACG00000003820,ENSGACG00000003582,ENSGACG00000003003,ENSGACG00000002955,ENSGACG00000002933,ENSGACG00000002902,ENSGACG00000014611,ENSGACG00000014553,ENSGACG00000012783,ENSGACG00000010888,ENSGACG00000010531,ENSGACG00000010396,ENSGACG00000008377,ENSGACG00000001978,ENSGACG00000001976,…
GO:0002684	7.88156e-05	positive regulation of immune system process	ENSGACG00000010170,ENSGACG00000002708,ENSGACG00000002708,ENSGACG00000002708,ENSGACG00000012473,ENSGACG00000012351,ENSGACG00000006455,ENSGACG00000008295,ENSGACG00000003820,ENSGACG00000003582,ENSGACG00000003003,ENSGACG00000002955,ENSGACG00000002933,ENSGACG00000002902,ENSGACG00000018290,ENSGACG00000014611,ENSGACG00000012783,ENSGACG00000001978,ENSGACG00000001976,ENSGACG00000001973,ENSGACG00000001941,…
GO:0031343	0.000105388	positive regulation of cell killing	ENSGACG00000010170,ENSGACG00000002708,ENSGACG00000002708,ENSGACG00000002708,ENSGACG00000001978,ENSGACG00000001976,ENSGACG00000001973,ENSGACG00000001941,ENSGACG00000001941,ENSGACG00000001937,ENSGACG00000001935,ENSGACG00000001935,ENSGACG00000001932,ENSGACG00000001932,ENSGACG00000001919,ENSGACG00000001913,ENSGACG00000001910,ENSGACG00000001910,ENSGACG00000020455,ENSGACG00000020069,ENSGACG00000002179,…
GO:0002711	0.00017725	positive regulation of T cell mediated immunity	ENSGACG00000010170,ENSGACG00000014611,ENSGACG00000001978,ENSGACG00000001976,ENSGACG00000001973,ENSGACG00000001941,ENSGACG00000001941,ENSGACG00000001937,ENSGACG00000001935,ENSGACG00000001935,ENSGACG00000001932,ENSGACG00000001932,ENSGACG00000001919,ENSGACG00000001913,ENSGACG00000001910,ENSGACG00000001910,ENSGACG00000020455,ENSGACG00000020069,ENSGACG00000002179,ENSGACG00000002179,ENSGACG00000001288,…
GO:0002682	0.000206122	regulation of immune system process	ENSGACG00000010170,ENSGACG00000002708,ENSGACG00000002708,ENSGACG00000002708,ENSGACG00000012473,ENSGACG00000012351,ENSGACG00000006455,ENSGACG00000008295,ENSGACG00000003820,ENSGACG00000003582,ENSGACG00000009039,ENSGACG00000003003,ENSGACG00000002955,ENSGACG00000002933,ENSGACG00000002902,ENSGACG00000018290,ENSGACG00000014611,ENSGACG00000012783,ENSGACG00000001978,ENSGACG00000001976,ENSGACG00000001973,…
GO:0001910	0.000256333	regulation of leukocyte mediated cytotoxicity	ENSGACG00000010170,ENSGACG00000002708,ENSGACG00000002708,ENSGACG00000002708,ENSGACG00000001978,ENSGACG00000001976,ENSGACG00000001973,ENSGACG00000001941,ENSGACG00000001941,ENSGACG00000001937,ENSGACG00000001935,ENSGACG00000001935,ENSGACG00000001932,ENSGACG00000001932,ENSGACG00000001919,ENSGACG00000001913,ENSGACG00000001910,ENSGACG00000001910,ENSGACG00000020455,ENSGACG00000020069,ENSGACG00000002179,…
GO:0002706	0.00028502	regulation of lymphocyte mediated immunity	ENSGACG00000010170,ENSGACG00000002708,ENSGACG00000002708,ENSGACG00000002708,ENSGACG00000014611,ENSGACG00000012783,ENSGACG00000001978,ENSGACG00000001976,ENSGACG00000001973,ENSGACG00000001941,ENSGACG00000001941,ENSGACG00000001937,ENSGACG00000001935,ENSGACG00000001935,ENSGACG00000001932,ENSGACG00000001932,ENSGACG00000001919,ENSGACG00000001913,ENSGACG00000001910,ENSGACG00000001910,ENSGACG00000020455,…
GO:0002696	0.000309008	positive regulation of leukocyte activation	ENSGACG00000010170,ENSGACG00000002708,ENSGACG00000002708,ENSGACG00000002708,ENSGACG00000012473,ENSGACG00000012351,ENSGACG00000006455,ENSGACG00000008295,ENSGACG00000003582,ENSGACG00000018290,ENSGACG00000014611,ENSGACG00000012783,ENSGACG00000020455,ENSGACG00000020069,ENSGACG00000020003,ENSGACG00000008985,ENSGACG00000008985,ENSGACG00000000339,ENSGACG00000000339,ENSGACG00000000339,ENSGACG00000000339,…
GO:0001916	0.000416067	positive regulation of T cell mediated cytotoxicity	ENSGACG00000010170,ENSGACG00000001978,ENSGACG00000001976,ENSGACG00000001973,ENSGACG00000001941,ENSGACG00000001941,ENSGACG00000001937,ENSGACG00000001935,ENSGACG00000001935,ENSGACG00000001932,ENSGACG00000001932,ENSGACG00000001919,ENSGACG00000001913,ENSGACG00000001910,ENSGACG00000001910,ENSGACG00000020455,ENSGACG00000020069,ENSGACG00000002179,ENSGACG00000002179,ENSGACG00000001288,ENSGACG00000000141,…
GO:0031341	0.000426144	regulation of cell killing	ENSGACG00000010170,ENSGACG00000002708,ENSGACG00000002708,ENSGACG00000002708,ENSGACG00000001978,ENSGACG00000001976,ENSGACG00000001973,ENSGACG00000001941,ENSGACG00000001941,ENSGACG00000001937,ENSGACG00000001935,ENSGACG00000001935,ENSGACG00000001932,ENSGACG00000001932,ENSGACG00000001919,ENSGACG00000001913,ENSGACG00000001910,ENSGACG00000001910,ENSGACG00000020455,ENSGACG00000020069,ENSGACG00000002179,…
GO:0050896	0.000456956	response to stimulus	ENSGACG00000004826,ENSGACG00000003066,ENSGACG00000002974,ENSGACG00000002971,ENSGACG00000002845,ENSGACG00000002845,ENSGACG00000002845,ENSGACG00000002708,ENSGACG00000002708,ENSGACG00000002698,ENSGACG00000002698,ENSGACG00000002698,ENSGACG00000002698,ENSGACG00000002698,ENSGACG00000002244,ENSGACG00000002244,ENSGACG00000002244,ENSGACG00000002244,ENSGACG00000002244,ENSGACG00000002155,ENSGACG00000002106,…
GO:0001914	0.000500666	regulation of T cell mediated cytotoxicity	ENSGACG00000010170,ENSGACG00000001978,ENSGACG00000001976,ENSGACG00000001973,ENSGACG00000001941,ENSGACG00000001941,ENSGACG00000001937,ENSGACG00000001935,ENSGACG00000001935,ENSGACG00000001932,ENSGACG00000001932,ENSGACG00000001919,ENSGACG00000001913,ENSGACG00000001910,ENSGACG00000001910,ENSGACG00000020455,ENSGACG00000020069,ENSGACG00000002179,ENSGACG00000002179,ENSGACG00000001288,ENSGACG00000000141,…
GO:0050776	0.000578729	regulation of immune response	ENSGACG00000010170,ENSGACG00000002708,ENSGACG00000002708,ENSGACG00000002708,ENSGACG00000012351,ENSGACG00000006455,ENSGACG00000003820,ENSGACG00000003582,ENSGACG00000003003,ENSGACG00000002955,ENSGACG00000002933,ENSGACG00000002902,ENSGACG00000014611,ENSGACG00000012783,ENSGACG00000001978,ENSGACG00000001976,ENSGACG00000001973,ENSGACG00000001941,ENSGACG00000001941,ENSGACG00000001937,ENSGACG00000001935,…
GO:0002376	0.000593183	immune system process	ENSGACG00000010170,ENSGACG00000001656,ENSGACG00000012473,ENSGACG00000012351,ENSGACG00000009412,ENSGACG00000007562,ENSGACG00000007562,ENSGACG00000007557,ENSGACG00000006455,ENSGACG00000010950,ENSGACG00000008295,ENSGACG00000007282,ENSGACG00000003820,ENSGACG00000003582,ENSGACG00000011461,ENSGACG00000009039,ENSGACG00000003003,ENSGACG00000002955,ENSGACG00000002933,ENSGACG00000002902,ENSGACG00000018290,…
GO:0002694	0.000660831	regulation of leukocyte activation	ENSGACG00000010170,ENSGACG00000002708,ENSGACG00000002708,ENSGACG00000002708,ENSGACG00000012473,ENSGACG00000012351,ENSGACG00000006455,ENSGACG00000008295,ENSGACG00000003582,ENSGACG00000018290,ENSGACG00000014611,ENSGACG00000012783,ENSGACG00000008445,ENSGACG00000008445,ENSGACG00000020455,ENSGACG00000020069,ENSGACG00000020003,ENSGACG00000008985,ENSGACG00000008985,ENSGACG00000000339,ENSGACG00000000339,…
GO:0003823	0.000932792	antigen binding	ENSGACG00000000116,ENSGACG00000012806,ENSGACG00000012783,ENSGACG00000010888,ENSGACG00000001978,ENSGACG00000001976,ENSGACG00000001973,ENSGACG00000001941,ENSGACG00000001941,ENSGACG00000001937,ENSGACG00000001935,ENSGACG00000001935,ENSGACG00000001932,ENSGACG00000001932,ENSGACG00000001919,ENSGACG00000001913,ENSGACG00000001910,ENSGACG00000001910,ENSGACG00000001698,ENSGACG00000001698,ENSGACG00000001698,…
GO:0050865	0.0009597	regulation of cell activation	ENSGACG00000010170,ENSGACG00000002708,ENSGACG00000002708,ENSGACG00000002708,ENSGACG00000012473,ENSGACG00000012351,ENSGACG00000006455,ENSGACG00000008295,ENSGACG00000003582,ENSGACG00000018290,ENSGACG00000014611,ENSGACG00000012783,ENSGACG00000008445,ENSGACG00000008445,ENSGACG00000005701,ENSGACG00000005688,ENSGACG00000020455,ENSGACG00000020069,ENSGACG00000020003,ENSGACG00000008985,ENSGACG00000008985,…
GO:0050867	0.000975719	positive regulation of cell activation	ENSGACG00000010170,ENSGACG00000002708,ENSGACG00000002708,ENSGACG00000002708,ENSGACG00000012473,ENSGACG00000012351,ENSGACG00000006455,ENSGACG00000008295,ENSGACG00000003582,ENSGACG00000018290,ENSGACG00000014611,ENSGACG00000012783,ENSGACG00000020455,ENSGACG00000020069,ENSGACG00000020003,ENSGACG00000008985,ENSGACG00000008985,ENSGACG00000000339,ENSGACG00000000339,ENSGACG00000000339,ENSGACG00000000339,…

## Sheet: tableS11_overlapWithCon
chrom (gasAcu1)	start (zero-based closed)	end (zero-based open)
chrI	1958594	1958647
chrI	2193957	2194001
chrI	2941613	2942023
chrI	2945857	2948960
chrI	2949318	2950362
chrI	7829292	7829355
chrI	7872537	7872656
chrI	8318984	8319125
chrI	8581333	8581417
chrI	8591972	8592046
chrI	8732017	8732076
chrI	8871887	8871967
chrI	9405145	9405192
chrI	9405522	9405576
chrI	9470616	9471212
chrI	13821378	13822292
chrI	20373248	20373323
chrI	21400460	21400506
chrI	21547590	21547649
chrI	21549768	21550015
chrI	21571941	21572020
chrI	21629027	21629432
chrI	21710520	21710693
chrI	21721160	21721215
chrI	21721659	21721766
chrI	21761410	21761478
chrI	25342420	25342527
chrII	384694	384764
chrII	3869830	3869918
chrII	3928045	3928142
chrII	12913186	12913258
chrII	14544041	14544755
chrII	14556746	14556826
chrII	14562625	14563076
chrII	16369520	16369771
chrII	16370086	16370238
chrII	16384487	16386731
chrII	16399128	16399469
chrII	16418041	16419641
chrII	17408142	17408214
chrII	18664071	18664142
chrII	22157529	22157593
chrII	22917244	22917315
chrIII	116506	116637
chrIII	250416	250506
chrIII	373910	373958
chrIII	4705270	4705334
chrIII	11648857	11648975
chrIII	12812745	12812803
chrIII	14408154	14408219
chrIII	14613034	14614276
chrIII	14615115	14616952
chrIII	14623359	14624443
chrIII	14628537	14630222
chrIII	14710581	14712927
chrIII	14713080	14713366
chrIII	14713520	14713817
chrIII	14715690	14716929
chrIII	14717031	14718072
chrIII	14719265	14719700
chrIII	14723084	14723550
chrIV	643164	643207
chrIV	3243650	3243752
chrIV	7778621	7778997
chrIV	7855273	7855317
chrIV	7992162	7992212
chrIV	8342060	8342315
chrIV	9262753	9262814
chrIV	10716436	10718008
chrIV	11915520	11915571
chrIV	11943438	11943497
chrIV	12806079	12806139
chrIV	12916088	12916138
chrIV	14065917	14066224
chrIV	14945824	14945978
chrIV	15736526	15736575
chrIV	15862010	15862404
chrIV	15937866	15937940
chrIV	16403649	16404181
chrIV	19475415	19475556
chrIV	19960340	19960525
chrIV	19984306	19984364
chrIV	20033649	20033704
chrIV	20160865	20160927
chrIV	21140181	21140291
chrIV	21142576	21142692
chrIV	21646762	21646846
chrIV	22828809	22829057
chrIV	24398866	24398947
chrIV	24611495	24611614
chrIV	24694995	24695037
chrIV	24703360	24703655
chrIV	24997912	24997968
chrIV	24999723	24999865
chrIV	25001816	25001896
chrIV	25143980	25144032
chrIV	25162350	25162707
chrIV	25326832	25326903
chrIV	25791284	25791352
chrIV	25792911	25793054
chrIV	26264595	26264739
chrIV	26298449	26299346
chrIV	29897569	29897624
chrIV	32176503	32176677
chrIX	6446810	6446868
chrIX	6548508	6548563
chrIX	6915748	6915823
chrIX	8066400	8066578
chrIX	8586563	8586613
chrIX	8910849	8910913
chrIX	10414559	10414612
chrIX	10710822	10710882
chrIX	12903219	12903711
chrIX	13641797	13642090
chrIX	17057174	17057338
chrIX	19400196	19400269
chrUn	4962497	4962556
chrUn	7287243	7287284
chrUn	7805242	7805693
chrUn	7813729	7814272
chrUn	17206360	17206508
chrUn	17416687	17417034
chrUn	30226764	30226829
chrUn	32015855	32016613
chrUn	32050890	32052199
chrUn	34769214	34769292
chrUn	38227959	38229489
chrUn	38888888	38889530
chrUn	38889684	38890126
chrUn	38892234	38892511
chrUn	39480213	39480892
chrUn	44825804	44826554
chrUn	46916075	46916507
chrUn	50930253	50930511
chrUn	53967203	53967291
chrV	69297	69359
chrV	225835	225947
chrV	2182929	2183701
chrV	2349175	2349365
chrV	3151916	3151974
chrV	6334178	6334312
chrV	11153364	11153470
chrV	11153997	11154048
chrVI	2115851	2115904
chrVI	2637254	2637303
chrVI	6300932	6301098
chrVI	16019954	16020019
chrVII	55570	55675
chrVII	1924481	1925031
chrVII	1987023	1987156
chrVII	1992941	1993135
chrVII	2039286	2039477
chrVII	3000222	3000626
chrVII	3000930	3001099
chrVII	3002782	3003544
chrVII	3008201	3009028
chrVII	3016699	3017043
chrVII	3017470	3018333
chrVII	3023016	3023170
chrVII	3030268	3030848
chrVII	6301241	6301287
chrVII	7048070	7048132
chrVII	7709443	7709529
chrVII	8807910	8808019
chrVII	10270378	10270656
chrVII	13532494	13532544
chrVII	13538212	13538258
chrVII	14140064	14140127
chrVII	14141045	14141236
chrVII	14183814	14183860
chrVII	14237844	14237894
chrVII	14346407	14346463
chrVII	14669247	14669332
chrVII	14783965	14784425
chrVII	15157070	15157572
chrVII	15305166	15305223
chrVII	15704712	15704784
chrVII	16118366	16118457
chrVII	16835454	16835566
chrVII	16861496	16861664
chrVII	17413079	17413167
chrVII	17744360	17744543
chrVII	17874100	17874146
chrVII	17968846	17968891
chrVII	18023295	18023343
chrVII	18324539	18324646
chrVII	19088515	19088602
chrVII	19465746	19465789
chrVII	20006875	20006912
chrVII	20101737	20101796
chrVII	20323684	20323736
chrVII	20933575	20933781
chrVII	21444610	21444712
chrVIII	5094435	5095512
chrVIII	5095758	5096882
chrVIII	5097149	5097876
chrVIII	5812825	5813195
chrVIII	5980684	5981139
chrVIII	6954133	6954205
chrVIII	7086357	7086406
chrVIII	8311893	8311958
chrVIII	8421662	8421719
chrVIII	8423543	8423599
chrVIII	8503302	8503546
chrVIII	8581585	8581639
chrVIII	10051899	10052394
chrVIII	11670321	11672448
chrVIII	11672911	11673802
chrVIII	11674169	11675052
chrVIII	11675914	11676204
chrVIII	11679213	11679523
chrVIII	11796805	11796940
chrVIII	11798482	11798595
chrVIII	13146923	13146967
chrVIII	13878631	13879406
chrVIII	15253396	15253491
chrVIII	17643899	17643988
chrX	6474025	6474463
chrX	6477252	6477789
chrX	6478242	6478915
chrX	6485732	6486429
chrX	9237727	9239588
chrX	10141540	10141599
chrX	14184787	14184847
chrXI	2416649	2416935
chrXI	4449719	4449936
chrXI	4450221	4450465
chrXI	4500091	4500592
chrXI	5238190	5239300
chrXI	5447909	5448524
chrXI	5490970	5491145
chrXI	5550702	5550797
chrXI	5848017	5848080
chrXI	5931645	5931700
chrXI	9737062	9737147
chrXI	9943663	9943711
chrXI	10191766	10191888
chrXI	10879567	10879662
chrXI	12069711	12069884
chrXI	12380024	12380987
chrXI	12411583	12412232
chrXI	15611260	15611883
chrXI	15613490	15614249
chrXII	745442	745501
chrXII	921387	921881
chrXII	956752	956992
chrXII	958617	959283
chrXII	980603	982993
chrXII	983094	984211
chrXII	2968650	2968911
chrXII	3672928	3674468
chrXII	7692288	7692354
chrXII	8060476	8060982
chrXII	10795801	10796276
chrXII	12151981	12152058
chrXII	12182816	12182877
chrXII	12603698	12603775
chrXII	12628275	12628367
chrXII	12654998	12655059
chrXII	12798197	12798271
chrXIII	5498442	5498497
chrXIII	7953192	7953255
chrXIII	8766936	8766978
chrXIII	9216884	9216933
chrXIII	9253212	9253318
chrXIII	11700191	11700287
chrXIII	11788012	11788126
chrXIII	11788742	11789109
chrXIII	11839532	11839606
chrXIII	12209878	12209927
chrXIII	18580653	18580989
chrXIV	1026570	1026694
chrXIV	4088446	4088498
chrXIV	8011695	8011751
chrXIX	1197638	1197698
chrXIX	2468933	2469272
chrXIX	2483552	2484494
chrXIX	2489111	2489348
chrXIX	2499767	2500377
chrXIX	2512395	2512577
chrXIX	2528776	2529372
chrXIX	2529372	2530569
chrXIX	2540873	2542115
chrXIX	2543356	2544478
chrXIX	2544504	2545392
chrXIX	7875940	7876001
chrXIX	13075139	13075215
chrXIX	13502404	13502492
chrXIX	14771730	14771996
chrXIX	14773064	14773582
chrXIX	14797893	14797936
chrXIX	14859685	14859793
chrXIX	16928647	16928737
chrXV	1494661	1494727
chrXV	2116708	2116761
chrXV	2125309	2125498
chrXV	2457363	2457435
chrXV	2563724	2563786
chrXV	9333047	9333086
chrXV	11683540	11683582
chrXVI	4276732	4278191
chrXVI	13873785	13874065
chrXVI	15249010	15249081
chrXVI	16525246	16525302
chrXVI	16555122	16555188
chrXVI	16631949	16632007
chrXVI	16773964	16774073
chrXVI	16892288	16892482
chrXVI	16901655	16901811
chrXVI	17663139	17663205
chrXVII	11102371	11102430
chrXVII	11147717	11147827
chrXVII	11510744	11510812
chrXVIII	5533857	5537266
chrXVIII	5545449	5546783
chrXVIII	8875230	8875330
chrXVIII	8884227	8884326
chrXVIII	9933267	9933345
chrXVIII	9984437	9984479
chrXVIII	10569144	10569189
chrXVIII	10981936	10982020
chrXVIII	12879487	12880123
chrXVIII	13723955	13724010
chrXVIII	14921716	14921872
chrXX	3607774	3608103
chrXX	6214223	6214484
chrXX	6238415	6238716
chrXX	7034678	7034771
chrXX	7982752	7983141
chrXX	8467060	8467639
chrXX	8818417	8818551
chrXX	8849704	8849854
chrXX	8850116	8850694
chrXX	9063379	9063446
chrXX	9134391	9134437
chrXX	9342456	9342529
chrXX	9354261	9354531
chrXX	9528304	9528357
chrXX	9751695	9751995
chrXX	10188317	10188372
chrXX	10956316	10957258
chrXX	11272975	11273074
chrXX	11332846	11332893
chrXX	12546627	12547006
chrXX	12606714	12606755
chrXX	13510277	13510372
chrXX	16615244	16615300
chrXXI	768623	768778
chrXXI	2010748	2011083
chrXXI	2544002	2544093
chrXXI	3465359	3465959
chrXXI	3589354	3589618
chrXXI	3989531	3989581
chrXXI	4054082	4054162
chrXXI	4560870	4560929
chrXXI	4571908	4571969
chrXXI	4947791	4947846
chrXXI	5159260	5159319
chrXXI	5838607	5838738
chrXXI	5895352	5895412
chrXXI	5962232	5962329
chrXXI	5966064	5966167
chrXXI	5989031	5989090
chrXXI	6063706	6063982
chrXXI	6108586	6108846
chrXXI	6108880	6108961
chrXXI	6128494	6128543
chrXXI	6130161	6130232
chrXXI	6132194	6132252
chrXXI	6585653	6585726
chrXXI	6648817	6648947
chrXXI	6690564	6690683
chrXXI	6870101	6870162
chrXXI	6906721	6906787
chrXXI	6963024	6963126
chrXXI	6996516	6996594
chrXXI	7019221	7019272
chrXXI	7096226	7096483
chrXXI	7112586	7112752
chrXXI	7153182	7153295
chrXXI	7161962	7162014
chrXXI	7162500	7162748
chrXXI	7173073	7173472
chrXXI	7180926	7181035
chrXXI	7207137	7207261
chrXXI	7230437	7230529
chrXXI	7255698	7255874
chrXXI	7257401	7257460
chrXXI	7417011	7417081
chrXXI	7525314	7525364
chrXXI	7977934	7978088
chrXXI	7981143	7981251

## Sheet: tableS12_fwRemoveCon
chrom (gasAcu1)	start (zero-based closed)	end (zero-based open)
chrUn	32015855	32016613
chrUn	32050890	32052199
chrUn	32059213	32060293
chrUn	39806180	39807386
chrUn	46916075	46916507
chrI	13821378	13822292
chrVII	14786697	14789182
chrXIII	1813562	1813629
chrXX	10319927	10320713
chrXVI	4276732	4278191
chrXVI	4293259	4296674
chrXVI	4302322	4304656
chrV	2182929	2183701
chrV	3151916	3151974

## Sheet: tableS13_maRemoveCon
chrom (gasAcu1)	start (zero-based closed)	end (zero-based open)
chrVIII	5095758	5096882
chrVIII	5097149	5097876
chrVIII	10051899	10052394
chrVIII	11670321	11672448
chrVIII	11672911	11673802
chrVIII	11674169	11675052
chrVIII	11675914	11676204
chrVIII	11679213	11679523
chrUn	14577268	14579527
chrUn	44825804	44826554
chrI	9405522	9405576
chrI	9470616	9471212
chrI	21561142	21561637
chrI	21602807	21603535
chrI	21629027	21629432
chrI	21915759	21916634
chrXIX	2464083	2465796
chrXIX	2486933	2487166
chrXIX	2489111	2489348
chrXIX	2499767	2500377
chrXIX	2505290	2506179
chrXIX	2511741	2511981
chrXIX	2512395	2512577
chrXIX	2534741	2535201
chrXIX	2535328	2535821
chrXIX	14771730	14771996
chrXIX	14773064	14773582
chrVII	1878257	1878544
chrVII	1924481	1925031
chrVII	3000222	3000626
chrVII	3002782	3003544
chrVII	3008201	3009028
chrVII	3016699	3017043
chrVII	3017470	3018333
chrVII	3030268	3030848
chrVII	10270378	10270656
chrVII	14141045	14141236
chrVII	16835454	16835566
chrVII	17413079	17413167
chrVII	20933575	20933781
chrVII	21444610	21444712
chrII	3869830	3869918
chrII	14544041	14544755
chrII	14562625	14563076
chrII	14567906	14568362
chrII	16384487	16386731
chrXI	2416649	2416935
chrXI	4450221	4450465
chrXI	4501988	4502174
chrXI	4503848	4503961
chrXI	4573311	4574658
chrXI	5238190	5239300
chrXI	5447909	5448524
chrXI	12068708	12069435
chrXI	12411583	12412232
chrXXI	3589354	3589618
chrXXI	4560870	4560929
chrXXI	5838607	5838738
chrXXI	6063706	6063982
chrXXI	6108586	6108846
chrXXI	6130161	6130232
chrXXI	6648817	6648947
chrXXI	7173073	7173472
chrXXI	7417011	7417081
chrXII	983094	984211
chrXII	8060476	8060982
chrXII	8096079	8096331
chrXII	10795801	10796276
chrXIII	11788742	11789109
chrXX	6214223	6214484
chrXX	8818417	8818551
chrXX	8849704	8849854
chrXX	10956316	10957258
chrXX	12546627	12547006
chrXVI	16901655	16901811
chrIV	7992162	7992212
chrIV	8342060	8342315
chrIV	9262753	9262814
chrIV	19475415	19475556
chrIV	21140432	21140603
chrIV	22828809	22829057
chrIV	25162350	25162707
chrIV	26298449	26299346
chrX	9237727	9239588
chrIX	14670641	14671765
chrIX	14672132	14672368

## Sheet: tableS14_maRemoveConEnrichment
Gene Ontology ID	P-value (corrected)	Gene Ontology Term	Genes contributing to enrichment
GO:0071496	5.65904e-06	cellular response to external stimulus	ENSGACG00000019470,ENSGACG00000007562,ENSGACG00000007557,ENSGACG00000003003,ENSGACG00000002955,ENSGACG00000002933,ENSGACG00000002902
GO:0030048	9.66394e-06	actin filament-based movement	ENSGACG00000002902,ENSGACG00000002551,ENSGACG00000003003,ENSGACG00000002955,ENSGACG00000002933
GO:0017022	1.65055e-05	myosin binding	ENSGACG00000002902,ENSGACG00000002551,ENSGACG00000003003,ENSGACG00000002955,ENSGACG00000002933
GO:0005516	1.65055e-05	calmodulin binding	ENSGACG00000018929,ENSGACG00000003003,ENSGACG00000002955,ENSGACG00000002933,ENSGACG00000002902
GO:0048741	2.36218e-05	skeletal muscle fiber development	ENSGACG00000002902,ENSGACG00000003003,ENSGACG00000002955,ENSGACG00000002933
GO:0014904	2.36218e-05	myotube cell development	ENSGACG00000002902,ENSGACG00000003003,ENSGACG00000002955,ENSGACG00000002933
GO:0007379	2.36218e-05	segment specification	ENSGACG00000002902,ENSGACG00000003003,ENSGACG00000002955,ENSGACG00000002933
GO:0001757	2.36218e-05	somite specification	ENSGACG00000002902,ENSGACG00000003003,ENSGACG00000002955,ENSGACG00000002933
GO:0061053	7.06097e-05	somite development	ENSGACG00000002902,ENSGACG00000003003,ENSGACG00000002955,ENSGACG00000002933
GO:0001756	7.06097e-05	somitogenesis	ENSGACG00000002902,ENSGACG00000003003,ENSGACG00000002955,ENSGACG00000002933
GO:0035282	0.000164161	segmentation	ENSGACG00000002902,ENSGACG00000003003,ENSGACG00000002955,ENSGACG00000002933
GO:0003779	0.000165302	actin binding	ENSGACG00000018929,ENSGACG00000002551,ENSGACG00000003003,ENSGACG00000002955,ENSGACG00000002933,ENSGACG00000002902
GO:0008092	0.000165915	cytoskeletal protein binding	ENSGACG00000018929,ENSGACG00000002551,ENSGACG00000003003,ENSGACG00000002955,ENSGACG00000002933,ENSGACG00000002902,ENSGACG00000020599
GO:0030864	0.000174633	cortical actin cytoskeleton	ENSGACG00000018929,ENSGACG00000003003,ENSGACG00000002955,ENSGACG00000002933,ENSGACG00000002902
GO:0009267	0.000174633	cellular response to starvation	ENSGACG00000019470,ENSGACG00000003003,ENSGACG00000002955,ENSGACG00000002933,ENSGACG00000002902
GO:0044448	0.000320897	cell cortex part	ENSGACG00000018929,ENSGACG00000002551,ENSGACG00000003003,ENSGACG00000002955,ENSGACG00000002933,ENSGACG00000002902
GO:0070938	0.000327138	contractile ring	ENSGACG00000002902,ENSGACG00000003003,ENSGACG00000002955,ENSGACG00000002933
GO:0048747	0.000327138	muscle fiber development	ENSGACG00000002902,ENSGACG00000003003,ENSGACG00000002955,ENSGACG00000002933
GO:0032982	0.000327138	myosin filament	ENSGACG00000002902,ENSGACG00000003003,ENSGACG00000002955,ENSGACG00000002933
GO:0032027	0.000327138	myosin light chain binding	ENSGACG00000002902,ENSGACG00000003003,ENSGACG00000002955,ENSGACG00000002933
GO:0016460	0.000327138	myosin II complex	ENSGACG00000002902,ENSGACG00000003003,ENSGACG00000002955,ENSGACG00000002933
GO:0014902	0.000327138	myotube differentiation	ENSGACG00000002902,ENSGACG00000003003,ENSGACG00000002955,ENSGACG00000002933
GO:0005859	0.000327138	muscle myosin complex	ENSGACG00000002902,ENSGACG00000003003,ENSGACG00000002955,ENSGACG00000002933
GO:0005826	0.000327138	actomyosin contractile ring	ENSGACG00000002902,ENSGACG00000003003,ENSGACG00000002955,ENSGACG00000002933
GO:0000146	0.000327138	microfilament motor activity	ENSGACG00000002902,ENSGACG00000003003,ENSGACG00000002955,ENSGACG00000002933
GO:0030863	0.000410168	cortical cytoskeleton	ENSGACG00000018929,ENSGACG00000003003,ENSGACG00000002955,ENSGACG00000002933,ENSGACG00000002902
GO:0070252	0.000586725	actin-mediated cell contraction	ENSGACG00000002902,ENSGACG00000003003,ENSGACG00000002955,ENSGACG00000002933
GO:0033275	0.000586725	actin-myosin filament sliding	ENSGACG00000002902,ENSGACG00000003003,ENSGACG00000002955,ENSGACG00000002933
GO:0031672	0.000586725	A band	ENSGACG00000002902,ENSGACG00000003003,ENSGACG00000002955,ENSGACG00000002933
GO:0031034	0.000586725	myosin filament assembly	ENSGACG00000002902,ENSGACG00000003003,ENSGACG00000002955,ENSGACG00000002933
GO:0031033	0.000586725	myosin filament organization	ENSGACG00000002902,ENSGACG00000003003,ENSGACG00000002955,ENSGACG00000002933
GO:0030049	0.000586725	muscle filament sliding	ENSGACG00000002902,ENSGACG00000003003,ENSGACG00000002955,ENSGACG00000002933
GO:0009880	0.000586725	embryonic pattern specification	ENSGACG00000002902,ENSGACG00000003003,ENSGACG00000002955,ENSGACG00000002933
GO:0008307	0.000586725	structural constituent of muscle	ENSGACG00000002902,ENSGACG00000003003,ENSGACG00000002955,ENSGACG00000002933
GO:0006200	0.000586725	obsolete ATP catabolic process	ENSGACG00000002902,ENSGACG00000003003,ENSGACG00000002955,ENSGACG00000002933

[truncated: 1 more sheets: tableS17_noOverlapWithAnnotatio]
